# Supplementary material for: DFT mechanistic insights into the formation of the metal-dioxygen complex [Co(12-TMC)O2]+ using H2O2 as an [O2] unit source
Source: Royal Society of Chemistry journal article supplement (doi:10.1039/d4dt02233e), 2024-01-01
Supplement: d4dt02233e1.pdf [file d4dt02233e1.pdf]

## Supporting Information

### DFT Mechanistic Insights into the Formation of Metal-dioxygen Complex [Co(12-TMC)O<sub>2</sub>]<sup>+</sup> using H<sub>2</sub>O<sub>2</sub> as [O<sub>2</sub>] unit source

Ruihua Zhao<sup>a,b</sup>, Zhi-Xiang Wang<sup>\*d</sup>, Mian Guo<sup>\*c</sup> and Jia Li<sup>\*a,b</sup>

<sup>a</sup>Guangzhou HKUST Fok Ying Tung Research Institute, Science and Technology Building, Nansha Information Technology Park, No.2 Huan Shi Avenue South, Nansha District, Guangzhou, 511462, China.

<sup>b</sup>Guangdong-Hong Kong Joint Laboratory for Carbon Neutrality, Jiangmen Laboratory of Carbon Science and Technology, Jiangmen 529199, Guangdong Province, China.

<sup>c</sup>College of Chemistry and Molecular Sciences, Wuhan University, Wuhan, Hubei 430072, P. R. China.

<sup>d</sup>School of Chemical Sciences, University of Chinese Academy of Sciences. Jia #19, Yuquan Road, Beijing, 100039, China.

Corresponding Author: \*E-mail: Captureready@gmail.com ; \*E-mail: whguomian@whu.edu.cn ; \*E-mail: zxwang@ucas.ac.cn

#### Contents:

|                                                                                                                          |         |
|--------------------------------------------------------------------------------------------------------------------------|---------|
| <b>SI1:</b> Results of other DFT levels (Table S1).....                                                                  | S2      |
| <b>SI2:</b> Possibilities of H <sub>2</sub> O <sub>2</sub> and NEt <sub>3</sub> forming N-oxide (Figure S1).....         | S3      |
| <b>SI3:</b> IRC result from <sup>2</sup> TS1 to <sup>2</sup> IM2 (Figure S2).....                                        | S3      |
| <b>SI4:</b> Geometric changes from <sup>2</sup> [Co <sup>II</sup> ] <sup>2+</sup> to <sup>2,4</sup> IM2 (Figure S3)..... | S4      |
| <b>SI5:</b> Mechanism feasibility verification (Table S2).....                                                           | S4      |
| <b>SI6:</b> Cartesian coordinates, SCF energies, and free energies of all optimized structures.....                      | S5~S137 |

## SI1: Results of other DFT levels

**Table S1:** Geometric and energetic results at M06(SMD, Solvent=CH<sub>3</sub>CN)/6-311++G\*\*//B3LYP(SMD, Solvent=CH<sub>3</sub>CN)/6-31G\*\* and energetic results at B3LYP-D3(SMD, Solvent=CH<sub>3</sub>CN)/6-311++G\*\*//B3LYP(SMD, Solvent=CH<sub>3</sub>CN)/6-31G\*\*.

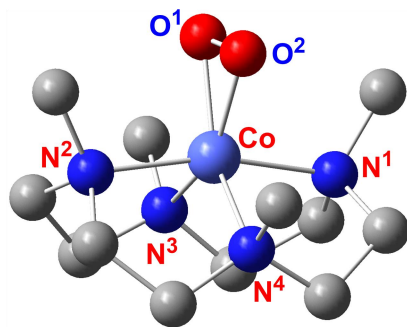

Co(12-TMC)O<sub>2</sub><sup>+</sup>

|                      | O <sup>1</sup> -O <sup>2</sup> | Co-O <sup>1</sup><br>Co-O <sup>2</sup> | Co-N <sup>1</sup><br>Co-N <sup>2</sup> | Co-N <sup>3</sup><br>Co-N <sup>4</sup> | ∠O-Co-O | Mulliken Spin      | ΔG   | ΔG <sup>a</sup> |
|----------------------|--------------------------------|----------------------------------------|----------------------------------------|----------------------------------------|---------|--------------------|------|-----------------|
| Exptl. (S=0)         | 1.439                          | 1.874<br>1.858                         | 2.016<br>2.025                         | 2.000<br>1.997                         | 45.36   |                    |      |                 |
| Closed shell singlet | 1.435                          | 1.842<br>1.841                         | 2.046<br>2.046                         | 2.030<br>2.031                         | 45.86   |                    | 0.0  | 0.0             |
| Triplet              | 1.416                          | 1.856<br>1.856                         | 2.232<br>2.232                         | 2.094<br>2.094                         | 44.85   | Co:2.19<br>O:-0.18 | -0.5 | -0.8            |
| Quintet              | 1.346                          | 2.065<br>2.062                         | 2.201<br>2.204                         | 2.150<br>2.153                         | 38.08   | Co:2.69<br>O:0.57  | -8.7 | -4.0            |

<sup>a</sup>At B3LYP-D3/6-311++G\*\*//B3LYP/6-31G\*\* level.

These two DFT levels failed to predict the closed shell singlet to be the ground state of the complex. Therefore, we used BP86/Def2TZVP//BP86/SVP to perform the study.

## SI2: Three possibilities of H<sub>2</sub>O<sub>2</sub> reacting with NEt<sub>3</sub> to form N-oxide

### Mechanism I

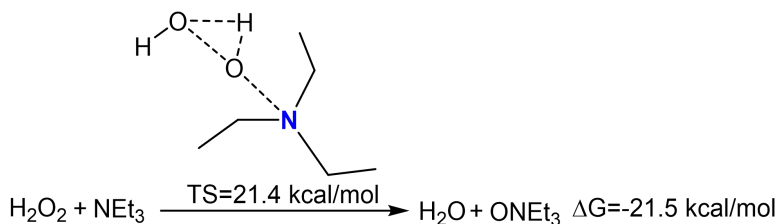

### Mechanism II

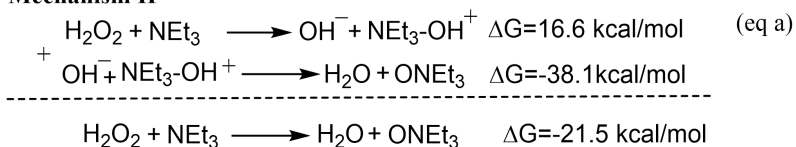

### Mechanism III

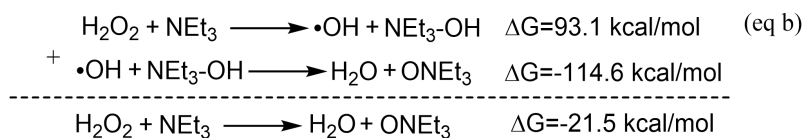

Figure S1

## SI3: IRC result from <sup>2</sup>TS1 to <sup>2</sup>IM2, showing the release of a water molecule

(The IRC calculation was performed at BP86(SMD, solvent=CH<sub>3</sub>CN)/SVP level)

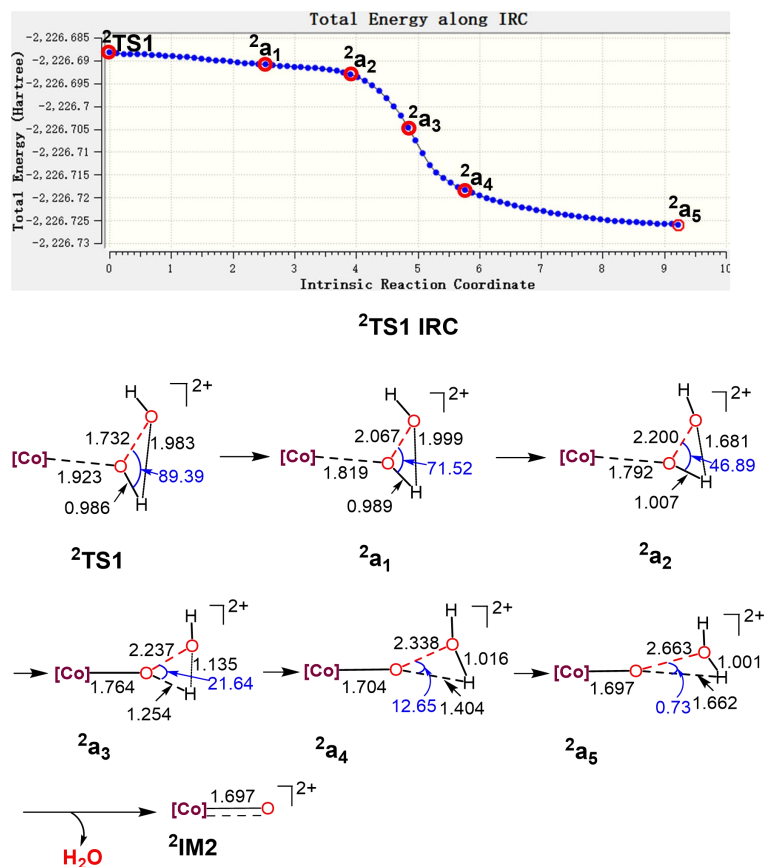

Figure S2

### SI4: Geometric changes from $^2[\text{Co}^{\text{II}}]^{2+}$ to $^2,^4\text{IM2}$

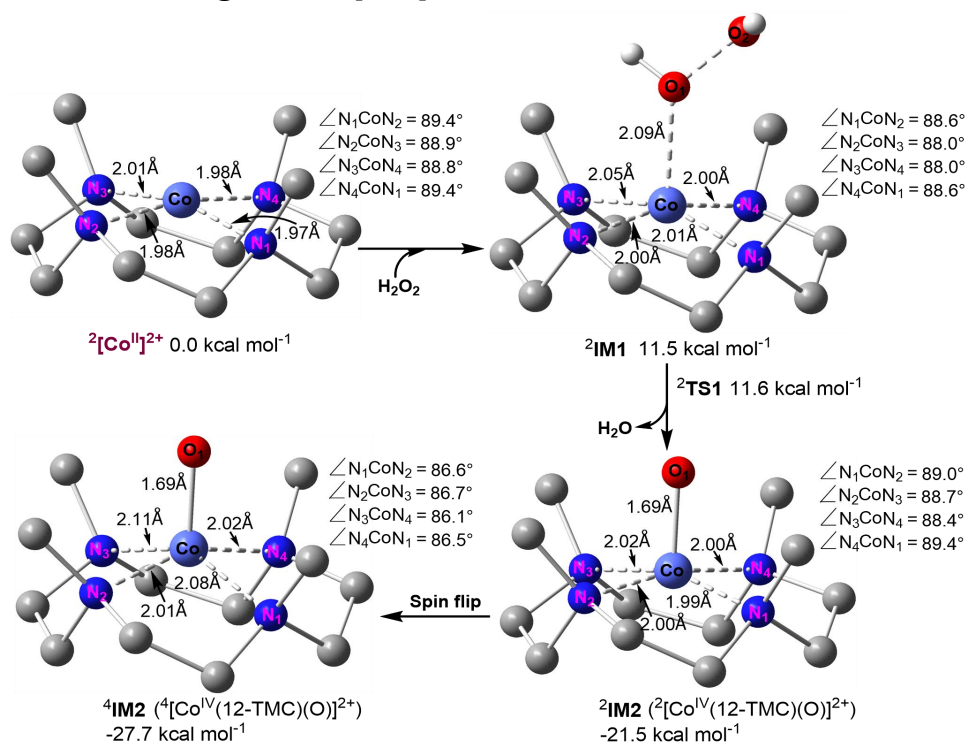

Figure S3

### SI5: Mechanism feasibility verification

**Table S2:** The key intermediates and transition states are used to verify the feasibility of the proposed mechanism, taking  $[\text{Co}^{\text{III}}(13\text{-TMC})(\text{O}_2)]^+$  and  $[\text{Co}^{\text{III}}(14\text{-TMC})(\text{O}_2)]^+$  as two examples. Relative free energies are given in kcal mol<sup>-1</sup>.

| L        | Key intermediates and transition states in Stage I-III |                |                  |                 |                 |               |                 |                |
|----------|--------------------------------------------------------|----------------|------------------|-----------------|-----------------|---------------|-----------------|----------------|
|          | Stage I                                                |                |                  |                 | Stage II        |               | Stage III       |                |
|          | $^2/4[\text{Co}]^{2+}$                                 | $^2\text{TS1}$ | $^2/4\text{IM2}$ | CS/3IM4         | OS/3IM5         | OS/3TS3       | $^3\text{TS5a}$ | $^5\text{TS7}$ |
| L=12-TMC | 0.0/<br>6.4                                            | 11.6           | -21.5/<br>-27.7  | -27.4/<br>-27.2 | -10.7/<br>-12.9 | -5.6/<br>-3.3 | 19.8            | 19.6           |
| L=13-TMC | 0.0/<br>5.5                                            | 14.8           | -21.9/<br>-31.3  | -24.9/<br>-29.7 | -8.4/<br>-10.6  | -0.1/<br>-4.6 | 21.2            | 20.0           |
| L=14-TMC | 0.0/<br>7.2                                            | 11.1           | -22.3/<br>-29.0  | -27.9/<br>-28.5 | -9.7/<br>-10.1  | 0.3/<br>-2.9  | 20.2            | 21.3           |

  

Structural diagrams for key intermediates and transition states:

- $^2\text{TS1}$  (L=12,13,14-TMC)
- $^2,^4\text{IM2}$  (L=12,13,14-TMC)
- CS/3IM4 (L=12,13,14-TMC)
- OS/3IM5 (L=12,13,14-TMC)
- OS/3TS3 (L=12-TMC)
- $^3\text{TS3}$  (L=12-TMC)
- OS/3TS3 (L=13,14-TMC)
- $^3\text{TS5a}$  (L=12,13,14-TMC)
- $^5\text{TS7}$  (L=12,13,14-TMC)

**SI6: Cartesian Coordinates in Å ,SCF Energies and Free Energies (in a.u.) at 298.15 K and 1 atm for the Optimized Structures [BS1=SVP,BS2=Def2QZVPP].**

$^2[\text{Co}]^{2+}$

BP86/BS1 SCF energy in solution: -2075.235429 a.u.

BP86/BS2 SCF energy in solution: -2076.259431 a.u.

BP86/BS2 Free energy in solution: -2075.90018 a.u.

2 2

Co 0.00084500 0.02253000 0.26024900  
N 0.02852000 1.97557500 -0.03126500  
N 1.97350600 -0.01441300 0.05641800  
C 0.04936000 2.75809500 1.22757500  
C 2.78867700 -0.53110600 1.18433900  
C 2.01043100 -0.92596500 -1.13131800  
C -1.20898100 2.23094600 -0.83891800  
C 1.26556000 2.18415000 -0.85395900  
C 2.41549700 1.38788000 -0.25627400  
N -1.97184200 0.04299800 0.05772200  
N -0.02891900 -1.96074100 -0.05169700  
C -2.80675300 -0.46421600 1.17455000  
C -0.06057900 -2.81091600 1.17235400  
C 1.25209900 -2.22480500 -0.82386800  
C -2.37531100 1.46052300 -0.23931900  
C -2.02982600 -0.85233900 -1.13984400  
C -1.29972200 -2.17404600 -0.85743400  
H 1.04083600 1.83545500 -1.88175900  
H 1.52411200 3.26431300 -0.91950600  
H 2.74638100 1.84196700 0.69786900  
H 3.29389200 1.38126700 -0.93797300  
H -0.85009700 2.52674500 1.82800000  
H 0.94291900 2.49139600 1.82224800  
H 0.07029600 3.84952900 1.01224100  
H -1.43726500 3.31879700 -0.88540300  
H -1.00452400 1.89435100 -1.87443300  
H -2.68457600 1.91413600 0.72241100  
H -3.25991400 1.48567700 -0.91267500  
H -3.88617400 -0.35471600 0.92905600  
H -2.60571500 -1.53150600 1.36954300  
H -2.58263600 0.11470500 2.09094000  
H -3.08476300 -1.05322600 -1.43719600  
H -1.54735500 -0.31500000 -1.98138500  
H -1.06594300 -2.67633100 -1.81711300  
H -1.95222000 -2.86357200 -0.28734600

H -0.96470800 -2.58591600 1.76752600  
H -0.06749500 -3.89041400 0.90467100  
H 0.82626200 -2.60289400 1.79899000  
H 1.02942600 -2.75904900 -1.76912600  
H 1.88035800 -2.90337400 -0.21539600  
H 1.53855100 -0.39026300 -1.97992200  
H 3.06041400 -1.15525600 -1.42559200  
H 2.57581500 0.06594000 2.09181400  
H 2.55773600 -1.59000300 1.39353300  
H 3.87200600 -0.45422000 0.94372200

$^4[\text{Co}]^{2+}$

BP86/BS1 SCF energy in solution: -2075.22618 a.u.  
BP86/BS2 SCF energy in solution: -2076.245888 a.u.  
BP86/BS2 Free energy in solution: -2075.889906 a.u.

2 4

Co -0.00036400 0.00383700 0.70328200  
N -0.01435600 2.00268000 -0.11208000  
N 2.03903200 0.02438200 0.01298900  
C -0.02995900 2.85940000 1.09814900  
C 2.99442200 -0.53013700 0.99774000  
C 1.95309200 -0.80721000 -1.21724500  
C -1.24654600 2.16675000 -0.92513000  
C 1.22430800 2.19488700 -0.90895800  
C 2.39187200 1.44014300 -0.28123400  
N -2.03903400 -0.00283000 0.01215600  
N 0.01397500 -2.00168000 -0.13792600  
C -2.97927400 -0.55684000 1.01150100  
C 0.03361600 -2.88398800 1.06012800  
C 1.27067700 -2.15091400 -0.93944600  
C -2.41070500 1.40410700 -0.30078100  
C -1.94976000 -0.84872900 -1.20849100  
C -1.25286000 -2.18033400 -0.91536200  
H 1.02552500 1.82549300 -1.93419800  
H 1.48109800 3.27505100 -0.99815900  
H 2.68167400 1.90802400 0.68130900  
H 3.28253000 1.49758000 -0.94849700  
H -0.92642900 2.63999500 1.70962200  
H 0.86728700 2.66046400 1.71558900  
H -0.04118800 3.93841200 0.82110200  
H -1.51685100 3.24191000 -1.03412800  
H -1.03045300 1.78290100 -1.94189600  
H -2.71865800 1.87886400 0.65254200

H -3.29417600 1.44046700 -0.97885700  
H -4.02578600 -0.53499900 0.62929300  
H -2.72248700 -1.60319300 1.25875500  
H -2.92811700 0.04668900 1.93865200  
H -2.96457800 -1.04206800 -1.62894300  
H -1.37851700 -0.28325200 -1.97092800  
H -1.05140000 -2.70472200 -1.87280100  
H -1.92435600 -2.83963200 -0.33080000  
H -0.86129700 -2.68942200 1.68236900  
H 0.04015300 -3.96051400 0.77395400  
H 0.93635300 -2.67410200 1.66588300  
H 1.05721800 -2.65292300 -1.90602100  
H 1.95678200 -2.81871100 -0.38168800  
H 1.37231900 -0.23854400 -1.96983700  
H 2.96772600 -0.98501400 -1.64494100  
H 2.93463800 0.05196800 1.93806200  
H 2.76168600 -1.58692500 1.22282400  
H 4.03849300 -0.47807100 0.61192200

${}^6[\text{Co}]^{2+}$

BP86/BS1 SCF energy in solution: -2075.089458 a.u.

BP86/BS2 SCF energy in solution: -2076.113401 a.u.

BP86/BS2 Free energy in solution: -2075.757275 a.u.

2 6

Co -0.01935000 0.00065900 -0.99100400  
N 2.06307000 -0.01326600 0.14872500  
N 0.03670400 2.02838200 0.04188600  
C 2.97580100 -0.05242500 -1.01425300  
C -0.56497000 2.99140900 -0.89935000  
C -0.73771300 1.83368700 1.29192300  
C 2.15798000 -1.23604200 0.98197200  
C 2.21736400 1.23515800 0.93404700  
C 1.46060300 2.37712600 0.28081500  
N 0.00260600 -2.03436900 0.04203100  
N -2.06534700 0.02201300 0.16842600  
C -0.56978800 -2.98496200 -0.92989700  
C -3.05826700 0.06956300 -0.92825900  
C -2.11733800 1.25745900 1.01177400  
C 1.41544300 -2.38961700 0.33585100  
C -0.82072900 -1.85569100 1.26377100  
C -2.17725800 -1.25271700 0.93998300  
H 1.84982100 1.04671900 1.96049300  
H 3.29350900 1.50625700 1.02148200

H 1.90352500 2.63318900 -0.70226600  
H 1.52342600 3.29080200 0.91526100  
H 2.76860400 -0.94417900 -1.63577300  
H 2.82607800 0.84424900 -1.64544200  
H 4.03293100 -0.08223000 -0.66289900  
H 3.22465700 -1.51728200 1.13524000  
H 1.74066400 -1.00431200 1.98054200  
H 1.88889800 -2.67861400 -0.62307300  
H 1.44899800 -3.28499800 0.99784100  
H -0.57855700 -4.01291400 -0.49971300  
H -1.60377300 -2.70580700 -1.20189000  
H 0.05016700 -2.97944100 -1.84751300  
H -0.95903000 -2.83679900 1.77506200  
H -0.26822000 -1.19530300 1.95807200  
H -2.73000600 -1.07332700 1.88624600  
H -2.78641200 -1.96015900 0.34626900  
H -2.92864900 -0.81096200 -1.58721600  
H -4.09395600 0.06460500 -0.51625600  
H -2.91510000 0.98815400 -1.52861800  
H -2.61533400 1.03321000 1.97814000  
H -2.75251000 1.99996500 0.49201600  
H -0.16644200 1.14819700 1.94566000  
H -0.83899600 2.80357800 1.83284400  
H 0.00567200 2.97152600 -1.84851700  
H -1.61834500 2.74196900 -1.11602100  
H -0.52516300 4.01911500 -0.47060800

<sup>2</sup>IM1

BP86/BS1 SCF energy in solution: -2226.688949 a.u.

BP86/BS2 SCF energy in solution: -2227.907675 a.u.

BP86/BS2 Free energy in solution: -2227.52557 a.u.

2 2

Co 0.02232200 0.01299300 0.05501400  
N -1.21670200 1.48317400 -0.52537300  
N 1.53722600 1.32290000 -0.03074100  
C -1.97919200 2.13150900 0.56985100  
C 2.42897600 1.52997500 1.13879900  
C 2.25536200 0.66470400 -1.16879300  
C -2.13011800 0.80510900 -1.50189400  
C -0.31882700 2.46051400 -1.22230900  
C 0.94892800 2.65124400 -0.40996600  
N -1.39182900 -1.30848300 -0.44062200  
N 1.39852300 -1.48413800 -0.16183400



C -1.85777200 -2.27916500 0.58190700  
C 1.85960200 -2.15968200 1.08314900  
C 2.57305700 -0.79399100 -0.83005100  
C -2.57742100 -0.52869400 -0.93211700  
C -0.64766400 -1.98490700 -1.55015900  
C 0.70068300 -2.50022300 -1.04608600  
H -0.08827700 2.04737300 -2.22329800  
H -0.83593900 3.43249000 -1.37962800  
H 0.72776300 3.18397100 0.53550700  
H 1.69344900 3.26197000 -0.96681000  
H -2.54125500 1.36892200 1.13902800  
H -1.28389500 2.64204200 1.26230700  
H -2.68923900 2.88102200 0.15653400  
H -3.00723100 1.44771100 -1.73665700  
H -1.56662100 0.66256200 -2.44511400  
H -3.24507700 -0.37615700 -0.06192900  
H -3.14582700 -1.11689700 -1.68565400  
H -2.64253400 -2.93867500 0.14986400  
H -1.02861800 -2.91608300 0.93609200  
H -2.27221600 -1.72361500 1.44268900  
H -1.24689000 -2.82499000 -1.97018500  
H -0.50180400 -1.24443500 -2.36165800  
H 1.34501000 -2.76607300 -1.90833900  
H 0.56218000 -3.42470100 -0.45357900  
H 0.99643300 -2.60790000 1.61183200  
H 2.58769000 -2.96760600 0.85017700  
H 2.35695200 -1.43140400 1.75151400  
H 2.86123200 -1.33452700 -1.75357800  
H 3.43856500 -0.85116200 -0.14255100  
H 1.59412800 0.71713800 -2.05791900  
H 3.19145000 1.21577000 -1.41663700  
H 1.83274500 1.91493700 1.98676300  
H 2.92288400 0.59124400 1.44769500  
H 3.21960900 2.27053900 0.88641500  
O -0.16639600 0.13946400 2.13250300  
H 0.46161200 -0.45741500 2.60585600  
O -1.40888000 -0.12203100 2.96758200  
H -1.52096200 0.78116300 3.35123000

<sup>4</sup>IM1

BP86/BS1 SCF energy in solution: -2226.669437 a.u.

BP86/BS2 SCF energy in solution: -2227.885433 a.u.

BP86/BS2 Free energy in solution: -2227.508721 a.u.

2 4

Co 0.02434100 0.01657800 0.37809700  
N -0.70491000 1.76727000 -0.67332200  
N 1.94901000 0.91093100 0.11821800  
C -1.39292200 2.64496500 0.30161200  
C 2.84894700 0.89364900 1.29423100  
C 2.46077500 0.06341500 -0.99908800  
C -1.64058700 1.29457100 -1.72941100  
C 0.50299600 2.43444800 -1.24420400  
C 1.70197200 2.31866500 -0.30704100  
N -1.63087600 -0.95353500 -0.64664700  
N 1.05747200 -1.83544000 -0.11689100  
C -2.46346900 -1.84633500 0.18970500  
C 1.20679300 -2.59292500 1.15489700  
C 2.39819900 -1.42752700 -0.65685400  
C -2.47876500 0.12456500 -1.22759400  
C -0.89606700 -1.71201600 -1.69625700  
C 0.19780600 -2.59062100 -1.08536200  
H 0.72340100 1.95849000 -2.21957900  
H 0.29763800 3.50879200 -1.44965700  
H 1.53194300 2.90908600 0.61535600  
H 2.60459300 2.74294400 -0.80363800  
H -2.24544400 2.10823500 0.75837100  
H -0.69612200 2.94893700 1.10607800  
H -1.77420500 3.56145000 -0.20255800  
H -2.30909700 2.11909900 -2.06488600  
H -1.03656000 0.99393400 -2.60775700  
H -3.17238100 0.45883300 -0.43042500  
H -3.10682700 -0.27074600 -2.05880800  
H -3.25423700 -2.33768600 -0.42221600  
H -1.84315400 -2.63333900 0.65736800  
H -2.94093900 -1.25222200 0.99079200  
H -1.59951600 -2.34532400 -2.28539200  
H -0.44322400 -0.98445800 -2.39855400  
H 0.81768000 -3.02018700 -1.89973300  
H -0.25590300 -3.44529600 -0.54631400  
H 0.20834100 -2.80783200 1.58297800  
H 1.73774600 -3.55773100 0.98936700  
H 1.78614500 -1.99633400 1.88576500  
H 2.64299500 -2.01436200 -1.56630600  
H 3.16651100 -1.68056000 0.09991500  
H 1.82704100 0.26564300 -1.88612200  
H 3.50667600 0.34835000 -1.25858400  
H 2.40839500 1.51057200 2.10140800

H 2.98079900 -0.13559100 1.67509300  
H 3.84976700 1.30687900 1.03262700  
O -0.72338900 0.20663100 2.24010000  
H -0.29304500 -0.31268400 2.96511700  
O -2.14510700 0.23851600 2.72296100  
H -2.19720300 1.19063000 2.98988000

<sup>2</sup>TS1s

BP86/BS1 SCF energy in solution: -2518.89838 a.u.  
BP86/BS2 SCF energy in solution: -2520.454885 a.u.  
BP86/BS2 Free energy in solution: -2519.887138 a.u.

2 2

Co -1.16688800 -0.05669000 0.07144500  
N -2.18865500 -1.03116400 -1.39422200  
N -1.03227000 -1.80285600 1.04400700  
C -1.40529200 -1.45675700 -2.57826200  
C 0.30303100 -2.28918100 1.46259100  
C -1.88462700 -1.44588100 2.22199600  
C -3.27403000 -0.07273900 -1.78202900  
C -2.75453700 -2.22195500 -0.68190200  
C -1.67809700 -2.84852900 0.18550700  
N -1.92522000 1.66548200 -0.63015700  
N -0.97873300 0.87655400 1.89416800  
C -1.02573200 2.80426100 -0.93812800  
C 0.37029300 1.41191600 2.21055800  
C -1.34710100 -0.18849900 2.90398200  
C -2.71043600 1.33564500 -1.86328300  
C -2.80527200 1.96361000 0.54357900  
C -1.97423000 2.01597600 1.82600800  
H -3.60564000 -1.87387000 -0.06397100  
H -3.15851000 -2.96412200 -1.40627000  
H -0.88119700 -3.29106400 -0.44373200  
H -2.09525500 -3.66798400 0.81218600  
H -1.01895800 -0.56863900 -3.10896000  
H -0.54934500 -2.08114000 -2.26055900  
H -2.04362800 -2.04491100 -3.27463500  
H -3.73490300 -0.36447600 -2.75170200  
H -4.07009300 -0.13518200 -1.01434000  
H -2.01583300 1.42803400 -2.72096500  
H -3.52438400 2.07900100 -2.01842200  
H -1.62016400 3.67510900 -1.29431600  
H -0.45774900 3.11454900 -0.04409700  
H -0.31282400 2.48929800 -1.72097200

H -3.34960400 2.92559000 0.39646300  
H -3.56479900 1.15999400 0.61207800  
H -2.64781700 1.99603500 2.70655100  
H -1.40929300 2.96629000 1.88093300  
H 0.67625800 2.13838200 1.43676100  
H 0.37777800 1.91515800 3.20328100  
H 1.10249400 0.58437800 2.22511300  
H -2.09936800 0.19851200 3.62131500  
H -0.44075600 -0.42740200 3.49329900  
H -2.91615000 -1.27568000 1.85465400  
H -1.92488200 -2.29089900 2.94785700  
H 0.92290900 -2.45283700 0.56259700  
H 0.80906200 -1.55341200 2.11115700  
H 0.20907100 -3.24730700 2.02101700  
O 0.81581100 0.01575000 -0.70259200  
H 1.93410700 0.09231700 -0.35370000  
O 0.96162100 0.62753900 -2.04304600  
H 1.02294500 -0.17763100 -2.60727600  
N 3.31174500 0.14995500 -0.11966600  
C 3.61434300 -0.91437600 0.88930000  
H 3.02628900 -0.65746500 1.79472300  
H 3.19475200 -1.86371700 0.50144900  
C 3.64945200 1.50304000 0.42283300  
H 3.21473600 1.54888400 1.44242600  
H 4.75368600 1.58546400 0.54026300  
C 3.98445600 -0.08369400 -1.43670000  
H 3.59921500 0.69088300 -2.12627100  
H 5.07892800 0.09373000 -1.32557300  
C 3.73235200 -1.46412400 -2.03963300  
H 4.12665700 -1.48325600 -3.07648400  
H 4.23740700 -2.27805700 -1.48125600  
H 2.64964900 -1.70374900 -2.08823100  
C 5.08556500 -1.11294000 1.26234700  
H 5.54759600 -0.19598400 1.68175800  
H 5.15324700 -1.90118100 2.04066800  
H 5.70020700 -1.44727800 0.40143000  
C 3.13213900 2.67505100 -0.40794200  
H 3.34189900 3.61922000 0.13604800  
H 3.62828900 2.75107200 -1.39666100  
H 2.03874000 2.60892000 -0.57337900

<sup>2</sup>TS1

BP86/BS1 SCF energy in solution: -2226.688249 a.u.

BP86/BS2 SCF energy in solution: -2227.908743 a.u.

BP86/BS2 Free energy in solution: -2227.525305 a.u.

2 2

Co 0.02272600 0.01703200 0.07271200  
N -1.45573700 1.22576700 -0.56547700  
N 1.25231300 1.60172800 0.01319100  
C -2.33715500 1.70974800 0.52659400  
C 2.05271400 1.96622000 1.20860400  
C 2.10532200 1.08926000 -1.10743900  
C -2.20995200 0.38048100 -1.54907800  
C -0.74730300 2.35945700 -1.24637900  
C 0.43446100 2.79231800 -0.39853200  
N -1.09549200 -1.54708100 -0.46330800  
N 1.67090500 -1.19361300 -0.12596900  
C -1.37263000 -2.57603500 0.57078900  
C 2.24698000 -1.79769500 1.11036000  
C 2.70298300 -0.26984700 -0.74959400  
C -2.40342900 -1.00947600 -0.97147200  
C -0.22039100 -2.05944900 -1.56558200  
C 1.19720100 -2.30524300 -1.04714800  
H -0.41859100 2.00323500 -2.24236800  
H -1.44243900 3.21056700 -1.41562900  
H 0.09085800 3.28317800 0.53243900  
H 1.06898100 3.52575400 -0.94256600  
H -2.70580900 0.85381400 1.12107300  
H -1.76487500 2.37350100 1.20049500  
H -3.19360000 2.27615800 0.10133200  
H -3.18950600 0.84573200 -1.79506000  
H -1.61857400 0.34472100 -2.48535700  
H -3.09776500 -0.98119800 -0.10936900  
H -2.83741900 -1.70235500 -1.72464200  
H -2.02900900 -3.36656500 0.14633600  
H -0.44130300 -3.05412800 0.92209700  
H -1.87732800 -2.09197500 1.42768400  
H -0.64001200 -2.99913400 -1.99095100  
H -0.21936900 -1.30314500 -2.37487800  
H 1.89340600 -2.41352800 -1.90239700  
H 1.23914200 -3.25257800 -0.47742100  
H 1.50098300 -2.45173200 1.60123800  
H 3.13545700 -2.41660500 0.85900400  
H 2.56313700 -1.00515400 1.81400900  
H 3.13617000 -0.73657700 -1.65651800  
H 3.52918300 -0.14876900 -0.02419200  
H 1.46018900 1.00129800 -2.00535300

H 2.91322700 1.81657400 -1.34787400  
H 1.36814900 2.22931700 2.03539100  
H 2.69645300 1.13020900 1.53225300  
H 2.69845000 2.84031400 0.97320700  
O -0.21502200 0.00232800 1.98039700  
H 0.24714600 -0.77449300 2.37311200  
O -1.57043500 -0.30550300 3.01299800  
H -1.69198700 0.64305000 3.24874200

<sup>2</sup>IM2

BP86/BS1 SCF energy in solution: -2150.345452 a.u.

BP86/BS2 SCF energy in solution: -2151.464093 a.u.

BP86/BS2 Free energy in solution: -2151.103429 a.u.

2 2

Co 0.00343600 0.01661800 0.19954000  
N 0.45560700 1.92720300 -0.14032900  
N 1.94159600 -0.44391800 -0.02614400  
C 0.66694700 2.74809400 1.07994600  
C 2.63944800 -1.12934200 1.08645400  
C 1.74515500 -1.30933600 -1.23062100  
C -0.71503400 2.41748100 -0.94441500  
C 1.69818300 1.82490500 -0.98095400  
C 2.65743000 0.83718500 -0.34355300  
N -1.93919100 0.45581300 -0.03009000  
N -0.45194000 -1.91811300 -0.15489300  
C -2.87313800 0.13514900 1.07537300  
C -0.66558500 -2.75808800 1.05773000  
C 0.75015800 -2.43069300 -0.93135600  
C -2.00741300 1.93015000 -0.31215600  
C -2.14820800 -0.39310600 -1.24637500  
C -1.73984300 -1.84118200 -0.96310600  
H 1.39036900 1.48332000 -1.98874400  
H 2.16727700 2.82542400 -1.09485500  
H 3.05667600 1.22992800 0.61059200  
H 3.52318200 0.63792300 -1.01090600  
H -0.25492000 2.75700200 1.68824200  
H 1.48259200 2.32041300 1.68879800  
H 0.92623000 3.78565500 0.78089500  
H -0.70031400 3.52676500 -1.00405100  
H -0.60073300 2.03232700 -1.97642500  
H -2.18144300 2.43296600 0.65835200  
H -2.87734300 2.15569400 -0.96553700  
H -3.88638900 0.51390000 0.82197900

H -2.93882000 -0.95353000 1.24445800  
H -2.50460800 0.61511400 1.99955000  
H -3.20852800 -0.34685900 -1.57937100  
H -1.52657300 0.03062800 -2.06133500  
H -1.61452900 -2.38298900 -1.92038100  
H -2.52644600 -2.36722900 -0.39056200  
H -1.49199700 -2.34328200 1.66061600  
H -0.91740000 -3.79555600 0.75093700  
H 0.25085200 -2.77223300 1.67369200  
H 0.41833200 -2.89511100 -1.88031300  
H 1.22620800 -3.22547600 -0.32671800  
H 1.36332100 -0.66228700 -2.04876700  
H 2.71558400 -1.73368400 -1.57110000  
H 2.54676100 -0.50982600 1.99626200  
H 2.19756300 -2.12013300 1.28836200  
H 3.70972800 -1.26611700 0.82120500  
O 0.00893500 0.03054600 1.89074200

<sup>4</sup>IM2

BP86/BS1 SCF energy in solution: -2150.355666 a.u.

BP86/BS2 SCF energy in solution: -2151.474122 a.u.

BP86/BS2 Free energy in solution: -2151.11343 a.u.

2 4

Co 0.01578000 -0.00275200 0.39452100  
N 1.96108300 0.39835200 -0.21286500  
N 0.40696000 -1.92875200 -0.03091500  
C 2.82599100 0.57040100 0.98646900  
C 0.05246800 -2.91753300 1.01827800  
C -0.42808000 -2.07156700 -1.27726300  
C 1.88429400 1.65940400 -1.01190200  
C 2.38318300 -0.78720000 -1.01870400  
C 1.87627300 -2.04579300 -0.33767200  
N -0.38279600 1.93218600 -0.02608200  
N -1.96391700 -0.39454800 -0.22514500  
C -1.09911600 2.69948900 1.02407000  
C -2.88054700 -0.57833900 0.93482200  
C -1.87632900 -1.68152400 -1.01409400  
C 0.92384800 2.61564400 -0.32778400  
C -1.20818500 1.75512000 -1.27433900  
C -2.38379100 0.81821000 -1.02395700  
H 1.96050900 -0.67583500 -2.03625900  
H 3.48990500 -0.81893000 -1.12042400  
H 2.39282200 -2.20817000 0.62768800

H 2.05145000 -2.94518000 -0.96619100  
H 2.46314400 1.41206400 1.60236600  
H 2.81041100 -0.34568300 1.60345600  
H 3.86818800 0.77632000 0.65994400  
H 2.88995600 2.12304200 -1.10929700  
H 1.54092900 1.39942700 -2.03198600  
H 1.33251800 2.96667900 0.63910800  
H 0.73410900 3.51283100 -0.95553300  
H -1.24999800 3.74296500 0.67303500  
H -2.08455300 2.25395500 1.24310700  
H -0.49087700 2.70269100 1.94643200  
H -1.55708800 2.74931800 -1.63000200  
H -0.54361600 1.33221000 -2.05336100  
H -2.81775200 0.50700600 -1.99514100  
H -3.18507900 1.33382600 -0.46136100  
H -2.88917600 0.33160600 1.56177100  
H -3.91234700 -0.77803200 0.57131900  
H -2.54425700 -1.43154300 1.55095600  
H -2.41188600 -1.57898200 -1.97901100  
H -2.39509100 -2.46982000 -0.43669200  
H 0.01363200 -1.41530400 -2.05275300  
H -0.35948900 -3.11877400 -1.64604600  
H 0.64054000 -2.70010100 1.92833300  
H -1.02171500 -2.87407100 1.26617700  
H 0.29541400 -3.93884400 0.65399400  
O -0.00200400 -0.00486700 2.08647600

<sup>2</sup>IM3

BP86/BS1 SCF energy in solution: -2301.801665 a.u.  
BP86/BS2 SCF energy in solution: -2303.121528 a.u.  
BP86/BS2 Free energy in solution: -2302.737745 a.u.

2 2

Co -0.24958100 0.00963400 0.00845300  
N -2.03573700 -0.44273500 -0.81990500  
N -0.05930100 -1.93083900 0.52114500  
C -1.98389400 -0.68585300 -2.28465300  
C 1.13440100 -2.67350500 0.04765400  
C -0.07006100 -1.71536700 2.00718400  
C -2.89370000 0.74050900 -0.47874600  
C -2.45801200 -1.66701500 -0.05975700  
C -1.29464600 -2.63659600 0.03364500  
N -0.76217700 1.94421600 -0.05170800  
N 1.08197300 0.46726700 1.48525500



C 0.15333800 2.90390000 -0.71401000  
C 2.48822200 0.71259600 1.06024300  
C 1.03833400 -0.74273800 2.40277300  
C -2.10984300 2.01848300 -0.71349800  
C -0.83342600 2.12109300 1.43528200  
C 0.49409700 1.73176900 2.09219000  
H -2.78747300 -1.33629100 0.94519700  
H -3.33024700 -2.14251600 -0.55751000  
H -1.05334400 -3.06263000 -0.95860400  
H -1.53819700 -3.48376200 0.70978400  
H -1.60800100 0.21231500 -2.80541200  
H -1.30425400 -1.52716000 -2.50606500  
H -3.00560700 -0.92737200 -2.64662500  
H -3.82011300 0.72922800 -1.09154900  
H -3.19737700 0.63931700 0.58172800  
H -1.92664000 2.17813100 -1.79327400  
H -2.66766700 2.90213500 -0.33543900  
H -0.29843700 3.91828600 -0.68445000  
H 1.13197000 2.94060900 -0.20642100  
H 0.30438700 2.58789200 -1.76189400  
H -1.10144400 3.17034100 1.68803800  
H -1.65113200 1.47006500 1.80821300  
H 0.33244100 1.58559800 3.17792100  
H 1.24281800 2.53789500 1.97664100  
H 2.53033800 1.57023600 0.36600700  
H 3.10867500 0.93598000 1.95412500  
H 2.88520400 -0.18093300 0.54645700  
H 0.89613100 -0.41522200 3.45117800  
H 2.02579400 -1.23582500 2.34405100  
H -1.06541900 -1.31355300 2.28348800  
H 0.05552400 -2.68606000 2.53543600  
H 1.11986200 -2.70755600 -1.05612700  
H 2.07274800 -2.19895400 0.37943600  
H 1.09833400 -3.71018000 0.44652600  
O 0.73552100 0.01894700 -1.37660400  
O 3.18873200 -0.75679100 -1.85812900  
H 2.23600700 -0.46662000 -1.62978300  
O 3.83805900 0.51609800 -2.13681200  
H 4.39313600 0.62141700 -1.33032600

<sup>4</sup>IM3

BP86/BS1 SCF energy in solution: -2301.808608 a.u.

BP86/BS2 SCF energy in solution: -2303.128086 a.u.

BP86/BS2 Free energy in solution: -2302.745736 a.u.

2 4

Co 0.18916700 -0.00219800 -0.12187200  
N 2.06890800 0.49964100 -0.81267200  
N 0.06111800 1.89538300 0.57089400  
C 2.02106300 0.78154300 -2.27287400  
C -1.15604700 2.65653800 0.19015800  
C 0.13487200 1.62312700 2.05076200  
C 2.93908000 -0.67997800 -0.50725800  
C 2.46577900 1.71085200 -0.02749500  
C 1.27527400 2.64305400 0.08449600  
N 0.82073700 -1.91393400 -0.12006700  
N -1.00830800 -0.54857300 1.53870700  
C -0.07220200 -2.90470000 -0.77390500  
C -2.42326200 -0.79897400 1.14512600  
C -0.94187600 0.63447600 2.47565800  
C 2.16489700 -1.94991300 -0.79744500  
C 0.93874500 -2.12526700 1.36472300  
C -0.37907300 -1.81935000 2.06809600  
H 2.80695600 1.36607800 0.96794500  
H 3.32202200 2.22510200 -0.51496700  
H 1.01336700 3.07704900 -0.89913500  
H 1.48853400 3.48758200 0.77434400  
H 1.70301600 -0.11992600 -2.82650600  
H 1.30518200 1.59531100 -2.48381200  
H 3.03467100 1.08265300 -2.61507100  
H 3.87136700 -0.64203200 -1.11075200  
H 3.23131900 -0.61621300 0.55900500  
H 1.97491300 -2.06187700 -1.88217000  
H 2.72272700 -2.85035900 -0.46182400  
H 0.39447000 -3.91067000 -0.70608500  
H -1.05955900 -2.93955000 -0.28378800  
H -0.20304600 -2.62752300 -1.83546000  
H 1.26270500 -3.17068600 1.56291500  
H 1.73618300 -1.44997200 1.73288500  
H -0.20058400 -1.73209300 3.15824000  
H -1.10473100 -2.64189200 1.92209100  
H -2.47451200 -1.63210200 0.42160700  
H -3.02224300 -1.05889600 2.04485400  
H -2.84446000 0.10439200 0.66880100  
H -0.74561700 0.29166600 3.51117500  
H -1.93687100 1.11733000 2.47594700  
H 1.14315500 1.21893600 2.26798300  
H 0.03168900 2.58237400 2.60458900

H -1.17714900 2.77131100 -0.90844100  
H -2.07578000 2.14583900 0.52143800  
H -1.11407000 3.66103000 0.66365600  
O -0.89798900 0.03607000 -1.44008300  
O -3.37461100 0.78082900 -1.74175600  
H -2.40546800 0.47130600 -1.68260900  
O -4.05562000 -0.47389100 -1.99760300  
H -4.56061100 -0.58494900 -1.15907000

<sup>2</sup>TS2

BP86/BS1 SCF energy in solution: -2301.80125 a.u.

BP86/BS2 SCF energy in solution: -2303.117271 a.u.

BP86/BS2 Free energy in solution: -2302.738761 a.u.

2 2

Co 0.20149300 0.01138600 -0.01555700  
N -0.61755700 1.53961500 1.03091100  
N -0.92779600 -1.26279300 1.06032800  
C -1.71344400 2.22982200 0.30030000  
C -1.76347400 -2.27227500 0.36430300  
C 0.20495900 -1.88522400 1.82649500  
C 0.54103800 2.46054500 1.28096000  
C -1.11844100 0.89050300 2.28764500  
C -1.80885900 -0.41467900 1.93409900  
N 1.67068500 1.27113900 -0.58608000  
N 1.52807800 -1.52254100 -0.28982400  
C 1.92419600 1.41858500 -2.03917500  
C 1.35710700 -2.24973100 -1.58199600  
C 1.25418500 -2.45902100 0.87460200  
C 1.34178400 2.61682000 -0.00075600  
C 2.79784900 0.60537300 0.14495400  
C 2.89593400 -0.86289700 -0.25620600  
H -0.24973200 0.72472800 2.95441500  
H -1.81759100 1.57209500 2.81725000  
H -2.73738200 -0.22407000 1.36285500  
H -2.08704900 -0.97960000 2.84992500  
H -1.31626900 2.69884200 -0.61723700  
H -2.49788400 1.50922100 0.00563700  
H -2.14655700 3.01280100 0.95842300  
H 0.17473400 3.44694800 1.63814300  
H 1.15573000 2.02139100 2.09116100  
H 0.76161100 3.17082500 -0.76336500  
H 2.27706300 3.18775400 0.18448800  
H 2.73671400 2.15985900 -2.19766600

H 2.22619700 0.46009600 -2.49562300  
H 0.99729800 1.76709200 -2.52841400  
H 3.75452000 1.13422000 -0.06169300  
H 2.59334800 0.69791800 1.23089100  
H 3.55814900 -1.40069600 0.45017700  
H 3.34174600 -0.96420200 -1.26351300  
H 1.48540700 -1.54708700 -2.42466300  
H 2.11815400 -3.05607600 -1.65347800  
H 0.34871800 -2.69679200 -1.63764500  
H 2.19114100 -2.64622400 1.43415700  
H 0.92365900 -3.42802300 0.45590900  
H 0.65569600 -1.09511800 2.45956900  
H -0.18101100 -2.67726900 2.50554600  
H -2.44324400 -1.76393200 -0.34390600  
H -1.13739500 -2.98413200 -0.20035400  
H -2.35124300 -2.84117600 1.11626100  
O -0.70090300 0.08778900 -1.49826700  
O -2.87376900 -0.53153000 -2.26224200  
H -1.81733200 -0.28738900 -1.75054600  
O -3.78931400 0.33984000 -1.62697400  
H -4.09647300 0.90691000 -2.37550000

<sup>2</sup>TS2a

BP86/BS1 SCF energy in solution: -2301.800768 a.u.

BP86/BS2 SCF energy in solution: -2303.117074 a.u.

BP86/BS2 Free energy in solution: -2302.739614 a.u.

2 2

Co 0.22958800 0.06970300 0.07509900  
N 1.69035700 1.21851700 -0.69414700  
N -0.45735500 1.66830300 1.05392100  
C 1.40812400 1.75665900 -2.04969000  
C -1.86462600 2.08592500 0.84487600  
C -0.19782300 1.11428400 2.42463300  
C 2.87845400 0.30060500 -0.69325200  
C 1.82563200 2.31307800 0.32581500  
C 0.44563900 2.81801700 0.70599900  
N 1.23860500 -1.55925000 -0.53636600  
N -0.75212700 -1.12192200 1.40713800  
C 0.56184300 -2.55518500 -1.39616100  
C -2.07000500 -1.67531700 0.98740100  
C -0.94129500 -0.20852800 2.60515700  
C 2.46653900 -1.05537900 -1.23867000

C 1.52663300 -2.06663600 0.84138000  
C 0.23167600 -2.25835400 1.63505900  
H 2.35608800 1.89346200 1.20374100  
H 2.45065500 3.13801500 -0.07807000  
H -0.02458400 3.34706500 -0.14471100  
H 0.49948800 3.53119300 1.55612500  
H 1.27637700 0.92465800 -2.76382500  
H 0.47832800 2.35191600 -2.03411100  
H 2.25849800 2.39432300 -2.37177900  
H 3.69989900 0.73646500 -1.30157300  
H 3.24547800 0.22432800 0.34935700  
H 2.21312900 -0.98145300 -2.31371500  
H 3.29289000 -1.79176500 -1.13831800  
H 1.28655500 -3.34875700 -1.67827800  
H -0.28466600 -3.02709700 -0.86947600  
H 0.18244300 -2.04783200 -2.30096600  
H 2.09870000 -3.01991500 0.79749000  
H 2.17545000 -1.31758100 1.34055100  
H 0.47538400 -2.33434300 2.71266000  
H -0.27127500 -3.20000800 1.34561500  
H -1.94141200 -2.32725700 0.10548400  
H -2.49866000 -2.27203800 1.82074300  
H -2.76057500 -0.85574200 0.72061200  
H -0.59062700 -0.71400700 3.52635900  
H -2.02650600 -0.03148100 2.72261200  
H 0.89724700 0.96191500 2.52303100  
H -0.50623700 1.84536300 3.20427100  
H -2.00562600 2.33829900 -0.22129500  
H -2.57152800 1.28628200 1.12119700  
H -2.08033400 2.98008500 1.46819400  
O -0.84519500 0.11345300 -1.28616300  
O -3.22365700 0.15045300 -1.41541100  
H -2.07425800 0.19208600 -1.34482500  
O -3.54264000 -0.89534700 -2.30948900  
H -3.98628800 -1.54879100 -1.71601200

<sup>2</sup>TS4

BP86/BS1 SCF energy in solution: -2301.792412 a.u.

BP86/BS2 SCF energy in solution: -2303.111837 a.u.

BP86/BS2 Free energy in solution: -2302.735559 a.u.

2 4

Co 0.04930300 -0.06667200 0.49346000

N 0.22978400 -2.06055000 -0.31170900

N -1.96075300 -0.24796400 -0.05808200  
C 0.33250500 -2.99279400 0.83880200  
C -2.90325000 0.17376000 1.00782800  
C -2.00234600 0.65084200 -1.25309000  
C 1.46133300 -2.08036600 -1.15306000  
C -1.00800700 -2.29473200 -1.11042600  
C -2.20936500 -1.68126500 -0.41032100  
N 2.05313400 0.13817000 -0.18077000  
N -0.15022900 1.98433300 -0.18441000  
C 2.96350800 0.76853300 0.80572800  
C -0.17480700 2.90076900 0.98796800  
C -1.46067200 2.04087600 -0.92317600  
C 2.55196700 -1.22787100 -0.52047400  
C 1.83681800 0.99040100 -1.38841100  
C 1.06149700 2.25953800 -1.03695400  
H -0.85665800 -1.84311300 -2.10995900  
H -1.17302600 -3.38418500 -1.26308700  
H -2.42812700 -2.21175300 0.53677600  
H -3.11586000 -1.76185100 -1.05000600  
H 1.24140600 -2.77290900 1.42758200  
H -0.54689000 -2.88846800 1.50044900  
H 0.38605500 -4.04006500 0.46764800  
H 1.82496700 -3.12295800 -1.28593900  
H 1.19170600 -1.69931400 -2.15725500  
H 2.90983800 -1.68402400 0.42334600  
H 3.42704900 -1.15447600 -1.20384800  
H 3.98695400 0.84955800 0.37691600  
H 2.61573000 1.78130800 1.07589300  
H 2.99268500 0.14942700 1.72072100  
H 2.81545700 1.25862900 -1.84734900  
H 1.27631600 0.38926900 -2.13140300  
H 0.75985200 2.77148900 -1.97333300  
H 1.71070100 2.96233900 -0.48122600  
H 0.76380500 2.79611300 1.56251200  
H -0.27785100 3.95475000 0.64700200  
H -1.02711900 2.65008000 1.64584300  
H -1.34580900 2.61750100 -1.86367400  
H -2.18206600 2.59438900 -0.29199200  
H -1.39612700 0.18162700 -2.05260700  
H -3.04769600 0.72797500 -1.62805800  
H -2.78924800 -0.49724200 1.87869100  
H -2.70210600 1.21076900 1.32902800  
H -3.94742800 0.11103200 0.62984900  
O 0.13179600 -0.03013300 2.23063600

H 0.78677000 -0.42312100 2.97692600  
O 1.79204300 -0.79150900 3.89327900  
O 1.81713100 0.04057500 4.97307300  
H 0.86514400 0.15517600 5.24425000

<sup>2</sup>TS4a

BP86/BS1 SCF energy in solution: -2301.804365 a.u.

BP86/BS2 SCF energy in solution: -2303.120684 a.u.

BP86/BS2 Free energy in solution: -2302.744235 a.u.

2 4

Co 0.16648700 -0.00089400 -0.09409200  
N 1.88086200 0.93198700 -0.74063300  
N -0.31758800 1.75527700 0.78529900  
C 1.72631900 1.35993800 -2.15738600  
C -1.66645900 2.30175200 0.49059200  
C -0.16847600 1.35161300 2.22782900  
C 2.98424700 -0.06852500 -0.58201900  
C 2.06013300 2.10577000 0.17220100  
C 0.71704900 2.77419400 0.38653500  
N 1.16679900 -1.74018600 -0.31700100  
N -0.86411700 -0.93082500 1.46928800  
C 0.48315800 -2.82072000 -1.07275200  
C -2.21057400 -1.41347000 1.05113200  
C -1.02366300 0.13133700 2.53326600  
C 2.47533800 -1.43505900 -0.99514000  
C 1.35137700 -2.07593100 1.13544600  
C 0.01138800 -2.10247900 1.86538300  
H 2.47992600 1.72971800 1.12522800  
H 2.79348500 2.82215200 -0.25737400  
H 0.35812600 3.25341500 -0.54411000  
H 0.77937100 3.56398900 1.16599300  
H 1.56726900 0.48011300 -2.80551700  
H 0.85557800 2.03155800 -2.25987000  
H 2.64652400 1.89391000 -2.47803500  
H 3.86350600 0.22471400 -1.19531400  
H 3.30351200 -0.05609700 0.47848900  
H 2.28758900 -1.47555900 -2.08539400  
H 3.21271800 -2.23115400 -0.75458700  
H 1.15877000 -3.70063800 -1.13651200  
H -0.45201200 -3.13202000 -0.57742700  
H 0.25078700 -2.45735500 -2.09009100  
H 1.87017000 -3.05581800 1.22902700  
H 2.01364100 -1.30484200 1.57467600

H 0.18849800 -2.09319800 2.95905200  
H -0.54510600 -3.02997400 1.63222900  
H -2.11489000 -2.18457600 0.26609400  
H -2.73905600 -1.85185600 1.92535400  
H -2.80090900 -0.57245900 0.64364700  
H -0.75216300 -0.27908500 3.52631200  
H -2.09449800 0.40541200 2.57573000  
H 0.90184200 1.13156200 2.40748400  
H -0.44961300 2.20575800 2.88286300  
H -1.74168000 2.51832300 -0.59016100  
H -2.45930600 1.58929700 0.77355900  
H -1.81026700 3.24348800 1.06322800  
O -0.93566100 -0.11771800 -1.46616300  
O -3.23478100 0.57313200 -1.53844200  
H -2.01693400 0.25020100 -1.53624600  
O -3.85420300 -0.41998700 -2.30290900  
H -4.35359200 -0.94255600 -1.62691100

<sup>CS</sup>IM4

BP86/BS1 SCF energy in solution: -2150.996422 a.u.

BP86/BS2 SCF energy in solution: -2152.117454 a.u.

BP86/BS2 Free energy in solution: -2151.745571 a.u.

2 1

Co 0.01688600 -0.00141700 0.15108900  
N 1.96298600 -0.32412800 -0.14344200  
N -0.31679100 -1.95529000 -0.05146600  
C 2.80738700 -0.45182800 1.06766400  
C -0.96099900 -2.69899300 1.05829600  
C -1.19722300 -1.83265500 -1.25412400  
C 2.35482000 0.86338600 -0.97438600  
C 1.96642000 -1.58193400 -0.96195800  
C 1.01272000 -2.59172300 -0.34640200  
N 0.33028200 1.95733000 -0.05165300  
N -1.95230900 0.32320900 -0.15365100  
C -0.03472200 2.86583200 1.06254700  
C -2.83492100 0.45717900 1.03992500  
C -2.37624200 -0.89759800 -0.95766200  
C 1.79178700 2.12714600 -0.34962000  
C -0.54576900 2.11722600 -1.25378500  
C -1.96431100 1.62244700 -0.94483500  
H 1.65296100 -1.31408500 -1.99013200  
H 2.99337800 -2.00094700 -1.03080200  
H 1.40830900 -2.96576100 0.61706100



H 0.87748900 -3.46927600 -1.01455700  
H 2.74089200 0.46925100 1.67272500  
H 2.45434200 -1.29454800 1.68701800  
H 3.86230200 -0.62441800 0.76535600  
H 3.46066000 0.92727000 -1.06759000  
H 1.94908300 0.70882200 -1.99392100  
H 2.29272800 2.34269800 0.61347200  
H 1.95156900 3.00525300 -1.01188600  
H 0.29818800 3.89865700 0.82425200  
H -1.12550400 2.88499100 1.22857300  
H 0.45725300 2.50781300 1.98509400  
H -0.57199300 3.17828800 -1.58841900  
H -0.09760400 1.52355900 -2.07722700  
H -2.52328400 1.48469200 -1.89099900  
H -2.51699600 2.37399600 -0.35019500  
H -2.50068100 1.29874200 1.67470300  
H -3.88181300 0.64787900 0.72113500  
H -2.81718800 -0.47413700 1.63725200  
H -2.84379500 -0.58222400 -1.91073300  
H -3.15278800 -1.42778500 -0.37436600  
H -0.58057900 -1.43026700 -2.08532600  
H -1.57000500 -2.83054800 -1.57614700  
H -0.37199800 -2.54257200 1.97992500  
H -1.99306100 -2.34718200 1.22881400  
H -0.99883300 -3.78094100 0.80812500  
O 0.14691600 -0.02016700 1.97474800  
H -0.76715000 0.03361700 2.32894400

<sup>3</sup>IM4

BP86/BS1 SCF energy in solution: -2150.996368 a.u.

BP86/BS2 SCF energy in solution: -2152.117888 a.u.

BP86/BS2 Free energy in solution: -2151.745337 a.u.

2 3

Co 0.00430100 -0.01341100 0.32572200  
N -0.08343000 -1.98354500 -0.23221400  
N -1.97884600 0.06898800 -0.03049300  
C -0.12624300 -2.85521100 0.97327600  
C -2.86789200 0.62958600 1.01673900  
C -1.95213900 0.92109200 -1.27003700  
C 1.15879900 -2.21735200 -1.03048400  
C -1.33357800 -2.10878100 -1.04141800  
C -2.44152100 -1.32577800 -0.35834900  
N 1.98271500 -0.08983500 -0.03038300

N 0.08103300 1.97912300 -0.25502600  
C 2.89386700 0.39718300 1.03315800  
C 0.12243900 2.88747300 0.92897200  
C -1.19232600 2.22228700 -1.03327100  
C 2.32400600 -1.52152900 -0.34597800  
C 2.03588600 0.76242600 -1.26858200  
C 1.36274500 2.11640200 -1.04851300  
H -1.12066000 -1.71197900 -2.05365800  
H -1.62331000 -3.17618300 -1.15620600  
H -2.73285500 -1.80491400 0.59604100  
H -3.35118700 -1.28008900 -0.99570600  
H 0.78117100 -2.70436800 1.58351800  
H -1.00396800 -2.60616600 1.59576200  
H -0.18718300 -3.91799800 0.65377500  
H 1.36093500 -3.30596100 -1.13233200  
H 0.98611800 -1.81701300 -2.04862600  
H 2.56855200 -2.01467500 0.61468200  
H 3.23839600 -1.56094200 -0.97720100  
H 3.94867500 0.24344700 0.71830800  
H 2.73850100 1.47242100 1.22749800  
H 2.69669400 -0.16751900 1.96228200  
H 3.09338400 0.89748400 -1.58685800  
H 1.51632400 0.20891400 -2.07502200  
H 1.15541800 2.58566800 -2.03058400  
H 2.03139300 2.80416400 -0.49541800  
H 1.02263900 2.68125900 1.53445600  
H 0.14379600 3.94539100 0.58792600  
H -0.76960400 2.72562700 1.56001800  
H -0.96192600 2.70114400 -2.00584600  
H -1.80900200 2.93885300 -0.45824400  
H -1.45573400 0.33170800 -2.06571800  
H -2.99231300 1.12722100 -1.60672400  
H -2.81680300 -0.00818300 1.91992800  
H -2.58331600 1.66340900 1.27970600  
H -3.91799400 0.63447100 0.65260500  
O 0.10037600 0.01872400 2.16619300  
H -0.78983600 0.05721800 2.58132100

<sup>5</sup>IM4

BP86/BS1 SCF energy in solution: -2150.981269 a.u.

BP86/BS2 SCF energy in solution: -2152.102504 a.u.

BP86/BS2 Free energy in solution: -2151.734534 a.u.

Co -0.00235600 -0.00872200 0.55748700  
N 0.20825400 -2.02628600 -0.23704300  
N -2.03103300 -0.20661700 -0.13265200  
C 0.28796800 -2.93411000 0.93282400  
C -3.02516400 0.25167400 0.86578500  
C -2.01552400 0.63978600 -1.35842600  
C 1.45865700 -2.04699000 -1.04605700  
C -1.00608100 -2.28325200 -1.06196800  
C -2.24022800 -1.65170000 -0.43035700  
N 2.03688600 0.19350600 -0.11452400  
N -0.19878200 2.01247700 -0.26918400  
C 2.91323500 0.84491300 0.88666300  
C -0.29032300 2.92774700 0.90039600  
C -1.47134700 2.04022800 -1.06697800  
C 2.53665400 -1.17921000 -0.40842400  
C 1.86294900 1.01792600 -1.34419100  
C 1.05150400 2.28387200 -1.05904100  
H -0.82258000 -1.86745800 -2.07155600  
H -1.16655700 -3.37736500 -1.18349200  
H -2.48443100 -2.14707000 0.53014600  
H -3.11772800 -1.78695800 -1.10182100  
H 1.15444000 -2.66915800 1.56658800  
H -0.63123500 -2.85560400 1.54163600  
H 0.40214700 -3.98466900 0.58445800  
H 1.83318500 -3.08871900 -1.15511600  
H 1.21100300 -1.68292600 -2.06223000  
H 2.87300400 -1.61562500 0.55276200  
H 3.42538400 -1.13244700 -1.07701600  
H 3.94429900 0.95390800 0.48181400  
H 2.53336600 1.84723100 1.15442300  
H 2.94748200 0.22484800 1.80183100  
H 2.85512700 1.29770800 -1.76600700  
H 1.34555500 0.39578200 -2.10092800  
H 0.79455300 2.77288100 -2.02067600  
H 1.66202100 3.00575800 -0.48344000  
H 0.61890400 2.83883600 1.52458000  
H -0.38453300 3.98285700 0.55915100  
H -1.17811500 2.67682300 1.51208400  
H -1.30627700 2.57012600 -2.02701300  
H -2.21505200 2.63080700 -0.49787200  
H -1.37843700 0.13722800 -2.11261300  
H -3.04036500 0.71918700 -1.78739100  
H -2.91218700 -0.34096900 1.79273400  
H -2.87576800 1.31934700 1.10795800

H -4.05706000 0.12041100 0.47004300  
O -0.02276300 -0.08891400 2.34774700  
H -0.26549100 0.72516000 2.84530000

<sup>os</sup>IM5

BP86/BS1 SCF energy in solution: -2226.089858 a.u.

BP86/BS2 SCF energy in solution: -2227.304251 a.u.

BP86/BS2 Free energy in solution: -2226.928102 a.u.

2 1

Co 0.01526000 0.01922000 0.09174700  
N -1.46012600 1.30655300 -0.38286600  
N 1.32755200 1.52245100 -0.07214400  
C -2.24241600 1.88114200 0.73855900  
C 2.21825100 1.85154300 1.06752000  
C 2.07173700 0.94228900 -1.23715700  
C -2.33044900 0.49122700 -1.29707700  
C -0.73790900 2.37950400 -1.14996800  
C 0.54068300 2.75200900 -0.42453100  
N -1.23195300 -1.50451800 -0.30985500  
N 1.57830000 -1.28003200 -0.17180800  
C -1.49145600 -2.58224300 0.67642300  
C 2.15278700 -1.90126900 1.05028900  
C 2.62528200 -0.43353500 -0.86708400  
C -2.54331600 -0.89114400 -0.70769700  
C -0.45161100 -2.01164500 -1.48572000  
C 0.97962300 -2.35205300 -1.06494400  
H -0.52323100 1.98965900 -2.16417100  
H -1.39055000 3.27023900 -1.27452500  
H 0.31123200 3.26775600 0.52792400  
H 1.15981800 3.44334700 -1.03648400  
H -2.78036200 1.07808100 1.27444100  
H -1.57096600 2.41170900 1.44023900  
H -2.98838400 2.60382200 0.34407300  
H -3.30319200 1.00208800 -1.46412700  
H -1.82093300 0.43069900 -2.27809100  
H -3.16576500 -0.83840700 0.20646800  
H -3.07158800 -1.55106500 -1.42991200  
H -2.20651700 -3.31402600 0.24169600  
H -0.56317600 -3.11828400 0.93939800  
H -1.92003700 -2.13579000 1.59031300  
H -0.94827700 -2.90574700 -1.92499500  
H -0.45549700 -1.22357500 -2.26614400  
H 1.60582000 -2.48731200 -1.96872400

H 1.00441800 -3.30793700 -0.50890500  
H 1.37248900 -2.47168700 1.58475300  
H 2.98383800 -2.58591800 0.77448900  
H 2.53582900 -1.11854100 1.72862800  
H 2.99081300 -0.94640700 -1.77901800  
H 3.48939200 -0.33340100 -0.18367900  
H 1.36657600 0.86363200 -2.08955300  
H 2.89529000 1.62144400 -1.55281100  
H 1.59762600 2.10764800 1.94520000  
H 2.87130400 1.00329800 1.33109000  
H 2.85832400 2.71913900 0.79811700  
O 0.10949200 0.07153700 1.92314100  
O -1.05325100 -0.27906900 2.65140700  
H -1.43987700 0.60071000 2.88579400

<sup>3</sup>IM5

BP86/BS1 SCF energy in solution: -2226.088112 a.u.

BP86/BS2 SCF energy in solution: -2227.30248 a.u.

BP86/BS2 Free energy in solution: -2226.931693 a.u.

2 3

Co 0.01899900 0.00759000 0.17978800  
N -0.48569100 1.88756200 -0.45363300  
N 1.94752500 0.54260000 -0.04087900  
C -0.84134600 2.76290100 0.69451600  
C 2.87881100 0.30906000 1.09130800  
C 2.27650200 -0.31279600 -1.23037500  
C -1.65059300 1.69430000 -1.37146100  
C 0.72796800 2.39393700 -1.16797700  
C 1.96683600 2.00723400 -0.38072700  
N -1.84594800 -0.55869200 -0.34535900  
N 0.61368100 -1.92549300 -0.25862200  
C -2.68694100 -1.32246300 0.60987600  
C 0.75493100 -2.77839000 0.95565300  
C 1.95875000 -1.77655900 -0.94011500  
C -2.59599400 0.67586300 -0.76223000  
C -1.47285300 -1.39269400 -1.53905300  
C -0.47863900 -2.47971000 -1.14817900  
H 0.73751600 1.94513200 -2.18023900  
H 0.67585800 3.49692000 -1.29827400  
H 2.00911900 2.55782100 0.57902800  
H 2.89285500 2.25225800 -0.94504000  
H -1.64253300 2.30029100 1.29893100  
H 0.03828100 2.90691700 1.34656800

H -1.18386200 3.74949100 0.31465200  
H -2.17491300 2.65868400 -1.54861800  
H -1.25787400 1.34905600 -2.34728800  
H -3.08161900 1.08019800 0.14659000  
H -3.40443900 0.40463200 -1.47559800  
H -3.65370100 -1.58076700 0.12535400  
H -2.18800300 -2.25674200 0.91977500  
H -2.87094300 -0.70323900 1.50465000  
H -2.38743500 -1.84019300 -1.98854800  
H -1.02512200 -0.72050100 -2.29695000  
H -0.03941100 -2.92828500 -2.06137900  
H -0.98360500 -3.29659900 -0.59840600  
H -0.20704500 -2.82735400 1.49799300  
H 1.05917800 -3.80730800 0.66411000  
H 1.52007600 -2.35336400 1.62960100  
H 1.97643300 -2.35587300 -1.88446200  
H 2.72507800 -2.21911500 -0.27601600  
H 1.67434200 0.05169200 -2.08587100  
H 3.34906000 -0.19137300 -1.50179300  
H 2.50893100 0.85284300 1.97952500  
H 2.95423100 -0.76504900 1.33392200  
H 3.89055600 0.68288100 0.82251500  
O 0.07832700 0.15482000 2.02392000  
O -1.11633800 0.18759600 2.79893900  
H -0.75145300 0.30675900 3.71016400

<sup>5</sup>IM5

BP86/BS1 SCF energy in solution: -2226.065202 a.u.

BP86/BS2 SCF energy in solution: -2227.278573 a.u.

BP86/BS2 Free energy in solution: -2226.909307 a.u.

2 5

Co 0.00808200 0.00806600 0.43434900  
N -0.62798400 1.86896400 -0.52646600  
N 1.95117300 0.75088600 -0.06635100  
C -1.03541700 2.70811300 0.62622500  
C 2.91930600 0.59435600 1.04477300  
C 2.28916900 -0.10731900 -1.23815300  
C -1.76871800 1.58859000 -1.43802000  
C 0.55090400 2.43584400 -1.23723700  
C 1.82745100 2.18651700 -0.44574300  
N -1.82576800 -0.71341300 -0.48402300  
N 0.79868000 -1.90862700 -0.29144000  
C -2.62563200 -1.59354800 0.39807400

C 0.98579100 -2.81722800 0.87057100  
C 2.12394400 -1.59209200 -0.92205900  
C -2.63784700 0.47061700 -0.87605400  
C -1.26633300 -1.43515800 -1.66040500  
C -0.22211400 -2.46845700 -1.23986500  
H 0.60327600 1.95992400 -2.23546700  
H 0.41556700 3.52791800 -1.40284900  
H 1.83155000 2.77532600 0.49240100  
H 2.71154200 2.51065200 -1.03946100  
H -1.89401800 2.24874700 1.14953600  
H -0.19956400 2.81249000 1.34360900  
H -1.33013200 3.72149500 0.27186700  
H -2.38296300 2.50444900 -1.58504400  
H -1.35432100 1.31392500 -2.42728800  
H -3.17418000 0.81055700 0.03193400  
H -3.41050700 0.18202800 -1.62411200  
H -3.53712800 -1.94701600 -0.13425300  
H -2.03990000 -2.47373900 0.71748700  
H -2.93156400 -1.02834700 1.29869700  
H -2.08111600 -1.94046600 -2.22825800  
H -0.80953800 -0.68603900 -2.33641600  
H 0.27806100 -2.86648000 -2.14651200  
H -0.71323200 -3.32577100 -0.74053100  
H 0.01960700 -2.98719900 1.38067900  
H 1.39003000 -3.79746600 0.53144400  
H 1.70141000 -2.37246100 1.58788400  
H 2.25277900 -2.17711800 -1.85622800  
H 2.91673000 -1.92180800 -0.22395400  
H 1.62381100 0.17965600 -2.07589900  
H 3.33632400 0.08706000 -1.56482800  
H 2.60063400 1.22244600 1.89819900  
H 2.96571800 -0.45833200 1.38013700  
H 3.93657400 0.91064500 0.72155800  
O -0.22296500 -0.33298600 2.23661300  
O -1.16441300 0.42579800 2.95286100  
H -0.76039200 0.44855200 3.85777100

<sup>o</sup>SIM6

BP86/BS1 SCF energy in solution: -2518.297243 a.u.

BP86/BS2 SCF energy in solution: -2519.849676 a.u.

BP86/BS2 Free energy in solution: -2519.292452 a.u.

2 1

Co 1.28810400 -0.00240500 0.01531800

N 1.14410700 0.65085100 1.91579700  
N 1.48237800 -1.87264100 0.72057300  
C -0.24488200 0.87761900 2.38528400  
C 0.58234600 -2.94047400 0.22390900  
C 2.90076300 -2.08284300 0.28575700  
C 1.93695500 1.92365800 1.92383200  
C 1.81930800 -0.42740800 2.70954900  
C 1.35756100 -1.78771000 2.21462300  
N 1.72822100 1.86900000 -0.54879300  
N 2.30686200 -0.64172800 -1.67966100  
C 0.97215700 2.51693000 -1.64989300  
C 1.44596900 -0.95071100 -2.85215800  
C 3.03072500 -1.88826100 -1.22327100  
C 1.61872400 2.72872200 0.67610600  
C 3.15541900 1.61372700 -0.94146300  
C 3.22593100 0.51584300 -2.00475500  
H 2.91274700 -0.31191600 2.57425200  
H 1.60528600 -0.30936000 3.79405800  
H 0.29125500 -1.95498700 2.46133400  
H 1.93964000 -2.60308700 2.69725500  
H -0.76437600 1.57461200 1.70394900  
H -0.80452700 -0.07462600 2.38214200  
H -0.23047100 1.29145300 3.41661500  
H 1.71743500 2.51572200 2.83901300  
H 3.01102700 1.65452900 1.96031400  
H 0.58041800 3.11147600 0.70860700  
H 2.29244900 3.60946000 0.58977400  
H 1.32362900 3.56398200 -1.77772500  
H 1.12535800 1.98079100 -2.60275400  
H -0.10382600 2.49648700 -1.40058200  
H 3.62846400 2.55020800 -1.31404100  
H 3.70649700 1.30595500 -0.02990100  
H 4.27257300 0.16290300 -2.09951700  
H 2.93140900 0.91564600 -2.99365900  
H 0.86945200 -0.05332100 -3.14099700  
H 2.06678700 -1.27723100 -3.71546700  
H 0.73411900 -1.75597900 -2.59424100  
H 4.10330100 -1.83744400 -1.49989400  
H 2.60055100 -2.75234800 -1.76487000  
H 3.52928400 -1.34374300 0.82345800  
H 3.25278000 -3.09724700 0.58143300  
H -0.46305000 -2.66553800 0.45253600  
H 0.68353400 -3.07343000 -0.86696500  
H 0.83035100 -3.90281500 0.72260000



O -0.47399100 -0.26742000 -0.52818000  
O -1.33044100 0.83633600 -0.56442100  
H -2.35714400 0.45031300 -0.32645600  
N -3.77307700 0.09317500 -0.26068100  
C -3.92554100 -0.90149800 -1.36340400  
H -3.58043800 -0.39320800 -2.28823500  
H -3.20369500 -1.72111100 -1.17088800  
C -4.51616500 1.35243200 -0.55912200  
H -4.28826400 1.60646800 -1.61555500  
H -5.61359000 1.16623700 -0.50145200  
C -4.11164200 -0.44355700 1.08649900  
H -3.87902200 0.35759800 1.81625100  
H -5.21047400 -0.62399700 1.15620700  
C -3.33955200 -1.70523100 1.46560300  
H -3.50951100 -1.93200000 2.53810100  
H -3.65672400 -2.59577100 0.88554300  
H -2.24924200 -1.56413800 1.31292600  
C -5.32639900 -1.48289300 -1.57564900  
H -6.07399400 -0.70481700 -1.83429200  
H -5.29617000 -2.20535800 -2.41774500  
H -5.69397700 -2.03228400 -0.68436300  
C -4.14900200 2.53490100 0.33808000  
H -4.66818000 3.44291000 -0.03242300  
H -4.46181200 2.38995700 1.39227200  
H -3.05870200 2.74256200 0.32280100

<sup>3</sup>IM6

BP86/BS1 SCF energy in solution: -2594.685261 a.u.

BP86/BS2 SCF energy in solution: -2596.341357 a.u.

BP86/BS2 Free energy in solution: -2595.763993 a.u.

2 3

Co 1.84937600 -0.01055900 0.00129100  
N 2.38954100 1.97054100 -0.10499300  
N 2.23723000 0.07779200 1.97446700  
C 1.20529000 2.86677500 -0.12267900  
C 1.19013400 -0.39353500 2.91369700  
C 3.45949500 -0.79274700 2.01365100  
C 3.17404700 2.08504000 -1.37148600  
C 3.22630500 2.19282800 1.11317400  
C 2.57241400 1.50709500 2.30123200  
N 2.19886100 -0.11825100 -1.97914500  
N 2.39568100 -1.99887500 0.08961900  
C 1.18679700 -0.72368200 -2.88113500

C 1.20843900 -2.90352800 0.11074000  
C 3.17044700 -2.14969700 1.38083200  
C 2.48646400 1.27609500 -2.45740600  
C 3.45202300 -0.94459900 -1.92863000  
C 3.21072900 -2.24304500 -1.16193400  
H 4.23127500 1.77174500 0.91108500  
H 3.35707000 3.27948400 1.31254800  
H 1.62399000 2.01048000 2.57300600  
H 3.23192500 1.54793100 3.19552100  
H 0.51235400 2.57103500 -0.93121900  
H 0.65704100 2.78849100 0.83294800  
H 1.53423200 3.91818700 -0.27150800  
H 3.27284400 3.14827800 -1.68282100  
H 4.19567400 1.70454600 -1.17444200  
H 1.51433400 1.73057600 -2.73170700  
H 3.10502400 1.24144200 -3.38140000  
H 1.54555400 -0.67006500 -3.93214100  
H 1.01167600 -1.78349600 -2.62566300  
H 0.23817700 -0.16980900 -2.77202100  
H 3.81084200 -1.15797400 -2.96035600  
H 4.23317300 -0.34352300 -1.42376700  
H 4.18248300 -2.70815000 -0.90226300  
H 2.66093900 -2.97123000 -1.78821100  
H 0.60222500 -2.75144700 -0.80078800  
H 1.53567500 -3.96530700 0.15660100  
H 0.58280800 -2.67652200 0.99300400  
H 4.12039800 -2.69103600 1.19922700  
H 2.56891500 -2.77675700 2.06611200  
H 4.26142400 -0.27095300 1.45392600  
H 3.80967900 -0.91509700 3.06314500  
H 0.26688200 0.18857900 2.74182100  
H 0.97159400 -1.46473600 2.76058800  
H 1.53295900 -0.24794900 3.96111200  
O 0.00742000 0.10333800 0.23093800  
O -0.83303100 0.40240000 -0.85049600  
H -1.69599700 0.77782800 -0.37485800  
N -5.15380000 0.00354400 -0.05332500  
C -4.76405800 -1.15032600 -0.90667700  
H -4.35844400 -0.72017300 -1.84738700  
H -3.91163800 -1.65976800 -0.41092000  
C -6.11649600 0.90354800 -0.74119300  
H -5.78376700 0.97358200 -1.79873000  
H -7.13691300 0.44942600 -0.75700400  
C -5.62399200 -0.38098300 1.30158500

H -5.85153400 0.56012000 1.84293600  
H -6.58835900 -0.94236900 1.23734300  
C -4.60184000 -1.18053700 2.11073700  
H -4.95671300 -1.28450500 3.15689000  
H -4.44449500 -2.20426100 1.71366000  
H -3.61840500 -0.66537300 2.13484100  
C -5.85890500 -2.17221600 -1.23648800  
H -6.71247900 -1.71566600 -1.77963900  
H -5.43795700 -2.96481200 -1.89013500  
H -6.25724700 -2.67223400 -0.32939500  
C -6.18629600 2.31344800 -0.14904900  
H -6.82144300 2.95515400 -0.79465200  
H -6.63133700 2.33375700 0.86703800  
H -5.17579400 2.76928700 -0.09558200  
O -2.91480400 1.40998300 0.21067000  
H -3.80230100 0.84487300 0.13050900  
H -2.81475100 1.58486400 1.16879900

<sup>o</sup>TS3

BP86/BS1 SCF energy in solution: -2518.297251 a.u.

BP86/BS2 SCF energy in solution: -2519.849548 a.u.

BP86/BS2 Free energy in solution: -2519.291246 a.u.

2 1

Co 1.28147000 -0.00073100 0.01164800  
N 1.19759000 0.65632500 1.91611300  
N 1.48580600 -1.87137000 0.71802700  
C -0.17678500 0.89466000 2.42162700  
C 0.56570400 -2.93269000 0.24576600  
C 2.89204100 -2.09358200 0.24967200  
C 1.99606100 1.92548300 1.90290300  
C 1.88569300 -0.42476000 2.69432900  
C 1.40167400 -1.78292900 2.21430600  
N 1.72971400 1.86397900 -0.56294900  
N 2.26792200 -0.64974300 -1.70290600  
C 0.95586700 2.51455300 -1.65020500  
C 1.38194000 -0.95022200 -2.85868500  
C 2.98689200 -1.90376700 -1.26210600  
C 1.64945900 2.72738900 0.66116800  
C 3.14788800 1.59777100 -0.97970500  
C 3.19220800 0.49870000 -2.04338900  
H 2.97619600 -0.31658500 2.53170800  
H 1.70009500 -0.30406200 3.78390500  
H 0.34163100 -1.94348500 2.49049600

H 1.99147700 -2.60116500 2.68268000  
H -0.71181700 1.58656300 1.74707300  
H -0.74187800 -0.05420500 2.44484100  
H -0.13215200 1.31838800 3.44816200  
H 1.80026700 2.52066800 2.82139700  
H 3.06977500 1.65251300 1.91358200  
H 0.61193000 3.10957100 0.71733700  
H 2.32106300 3.60769900 0.55592400  
H 1.30298900 3.56273500 -1.78073500  
H 1.09411900 1.98181100 -2.60721800  
H -0.11610800 2.49032800 -1.38261300  
H 3.62165100 2.53062600 -1.36060900  
H 3.71196500 1.28508800 -0.07798100  
H 4.23408300 0.13619300 -2.15350500  
H 2.88673500 0.90041000 -3.02817200  
H 0.81039000 -0.04686800 -3.13865600  
H 1.98201200 -1.28509300 -3.73354900  
H 0.66583800 -1.74688100 -2.58567200  
H 4.05280300 -1.86777600 -1.56570800  
H 2.53148600 -2.76311400 -1.79047700  
H 3.54030600 -1.35959800 0.77019200  
H 3.24191600 -3.11071600 0.53886200  
H -0.47089800 -2.65046000 0.50382200  
H 0.63514000 -3.06339400 -0.84797200  
H 0.82033900 -3.89795400 0.73558300  
O -0.50275700 -0.24508000 -0.47719000  
O -1.35137600 0.86124300 -0.49218300  
H -2.41516700 0.46152200 -0.29779400  
N -3.77412800 0.09563600 -0.25500800  
C -3.89936800 -0.93603200 -1.32961900  
H -3.56337100 -0.44521000 -2.26694300  
H -3.15872100 -1.73154900 -1.11080200  
C -4.53984400 1.33183700 -0.59991400  
H -4.29642800 1.56284600 -1.65790000  
H -5.63222300 1.11873600 -0.55719600  
C -4.11169000 -0.40522800 1.10838900  
H -3.88939600 0.42074400 1.81309100  
H -5.20832000 -0.59469900 1.17687400  
C -3.32540800 -1.64575700 1.52507800  
H -3.49841000 -1.84505600 2.60245000  
H -3.62854300 -2.55507300 0.96739400  
H -2.23661200 -1.49368400 1.37369300  
C -5.28538800 -1.55532000 -1.52624800  
H -6.05175700 -0.80268200 -1.80396300

H -5.23671000 -2.29690900 -2.35057400  
H -5.63931800 -2.09218200 -0.62194600  
C -4.21719500 2.54387600 0.27356200  
H -4.74762800 3.42982800 -0.13257000  
H -4.55036600 2.41959600 1.32402700  
H -3.13180700 2.77530500 0.27543600

<sup>3</sup>TS3

BP86/BS1 SCF energy in solution: -2594.682453 a.u.

BP86/BS2 SCF energy in solution: -2596.338002 a.u.

BP86/BS2 Free energy in solution: -2595.762321 a.u.

2 3

Co 1.82141100 -0.01999000 0.01660800  
N 2.37332900 1.95057400 -0.16702500  
N 2.64232800 0.01251400 1.85505700  
C 1.23324600 2.86634700 0.08757800  
C 1.82487200 -0.47102700 2.99273500  
C 3.82412900 -0.87279600 1.58797000  
C 2.86418300 2.07526100 -1.57129700  
C 3.45955800 2.13432700 0.84200300  
C 3.06720000 1.42672700 2.12960500  
N 1.71589000 -0.08996300 -1.99176300  
N 2.31795700 -2.02978900 -0.04926600  
C 0.50238000 -0.64336500 -2.64080200  
C 1.15834900 -2.91858500 0.24408500  
C 3.37941600 -2.21335900 1.01043200  
C 1.93222200 1.30835100 -2.49421500  
C 2.92038000 -0.95511100 -2.23241300  
C 2.80121200 -2.26678000 -1.46132200  
H 4.39179200 1.71104800 0.41814600  
H 3.64716700 3.21391600 1.03552700  
H 2.20409200 1.93321700 2.60393500  
H 3.90220700 1.43978100 2.86432300  
H 0.36294100 2.57402700 -0.52883000  
H 0.92454600 2.79956100 1.14649500  
H 1.53006100 3.91360800 -0.14097400  
H 2.92352500 3.14291300 -1.87904700  
H 3.89275700 1.66642200 -1.61120200  
H 0.93746500 1.79319000 -2.53332800  
H 2.32992300 1.28292200 -3.53279700  
H 0.57725400 -0.52617100 -3.74404800  
H 0.38870600 -1.71764600 -2.41300100  
H -0.37900000 -0.10166800 -2.25066000

H 3.04167700 -1.15066000 -3.32207000  
H 3.81271200 -0.39248500 -1.89330100  
H 3.78220100 -2.78295500 -1.45353100  
H 2.08487300 -2.94920600 -1.95799500  
H 0.34235900 -2.73026600 -0.47704300  
H 1.46102300 -3.98720100 0.17830400  
H 0.77881800 -2.71510500 1.26187600  
H 4.25694900 -2.74731800 0.59328400  
H 2.95935900 -2.85909800 1.80536000  
H 4.48393800 -0.34451500 0.87196500  
H 4.40786500 -1.02670200 2.52399000  
H 0.90645600 0.14105400 3.05788900  
H 1.53575100 -1.52773800 2.85424700  
H 2.40006500 -0.38137000 3.94021700  
O 0.05554500 0.10591700 0.61910600  
O -0.95393400 0.55738900 -0.21160400  
H -1.88667800 0.71067100 0.51689700  
N -4.94066300 0.05036700 0.04207400  
C -4.47587500 -1.23604000 -0.56667900  
H -3.56733400 -0.98419900 -1.15198800  
H -4.13681800 -1.88349100 0.26726700  
C -5.19608400 1.09764700 -0.99843600  
H -4.33648700 1.05092200 -1.69892500  
H -6.10592700 0.82845700 -1.57889500  
C -6.09777100 -0.09988800 0.97816300  
H -6.28437400 0.90349400 1.40916400  
H -7.00512300 -0.37138200 0.39345900  
C -5.86727200 -1.09862000 2.10895400  
H -6.72416900 -1.04862800 2.81178800  
H -5.79593600 -2.14630400 1.75288500  
H -4.95028500 -0.86394000 2.68940600  
C -5.48454700 -1.98128800 -1.43937200  
H -5.80676300 -1.38554000 -2.31789800  
H -5.01005600 -2.90738200 -1.82513100  
H -6.39030400 -2.28646100 -0.87563900  
C -5.32040200 2.51214700 -0.43198600  
H -5.32642000 3.23920600 -1.26984100  
H -6.25787800 2.66477900 0.14025300  
H -4.46260500 2.75359800 0.22890600  
O -2.88665200 0.89956300 1.24053700  
H -3.90749500 0.46681600 0.70315000  
H -2.74365800 0.38499200 2.06111600

<sup>5</sup>TS3

BP86/BS1 SCF energy in solution: -2594.666556 a.u.

BP86/BS2 SCF energy in solution: -2596.320929 a.u.

BP86/BS2 Free energy in solution: -2595.750454 a.u.

2 5

Co -1.65476900 0.00296500 -0.11478600

N -2.50919800 1.88838100 0.52027600

N -2.90984000 0.31891400 -1.83038600

C -1.39119800 2.84473800 0.33658700

C -2.24747700 0.02815500 -3.12142100

C -4.01344100 -0.63800000 -1.53263900

C -2.91356200 1.78816900 1.94759600

C -3.65614900 2.20014200 -0.37663000

C -3.37464800 1.73394400 -1.80098200

N -1.71729800 -0.39465600 2.02886500

N -2.36931800 -2.05293100 -0.24142100

C -0.49236700 -1.03410600 2.55440500

C -1.25547300 -2.90895100 -0.72888800

C -3.48610300 -2.04349900 -1.24574900

C -1.94218900 0.90247500 2.71943000

C -2.90452000 -1.28440400 2.10064100

C -2.78062900 -2.46909500 1.14117300

H -4.55000200 1.69213300 0.03502600

H -3.87253500 3.29200500 -0.37398300

H -2.57601200 2.34760900 -2.26270900

H -4.28647300 1.86305600 -2.42744700

H -0.52917100 2.54923300 0.96246100

H -1.06231300 2.85421100 -0.71977500

H -1.71326900 3.87190000 0.62179600

H -2.95617800 2.79693300 2.41569500

H -3.93933600 1.37243300 1.97834700

H -0.95497800 1.39734000 2.81311600

H -2.32229200 0.73845200 3.75393900

H -0.57787900 -1.20959000 3.65099300

H -0.31141700 -2.00420600 2.05698400

H 0.37433500 -0.37488000 2.35721400

H -3.05256800 -1.66090300 3.13979600

H -3.79846500 -0.68385800 1.83906700

H -3.74920000 -3.00934900 1.10733200

H -2.02712300 -3.18770200 1.51806900

H -0.41130200 -2.87251300 -0.01550400

H -1.59108100 -3.96494900 -0.83713700

H -0.90540900 -2.54792700 -1.71469800

H -4.32536200 -2.67864400 -0.89334500

H -3.10709100 -2.50623600 -2.17750000  
H -4.56714900 -0.25894900 -0.65113000  
H -4.73222800 -0.67703000 -2.38362400  
H -1.40737800 0.73368100 -3.26788400  
H -1.84627000 -1.00207600 -3.13257000  
H -2.96418400 0.13921300 -3.96685600  
O 0.14755400 -0.16312300 -0.47732800  
O 1.07462700 0.72737100 0.00606100  
H 1.94815600 0.61000700 -0.70479800  
N 5.08437800 0.10792000 -0.06710800  
C 4.73402400 -1.18057700 0.59811800  
H 3.74428700 -1.02273300 1.07686000  
H 4.57279000 -1.93135600 -0.20304300  
C 5.10779500 1.24304500 0.89967000  
H 4.23134400 1.10949600 1.56852100  
H 6.01594600 1.17974800 1.54395700  
C 6.33458800 0.04750300 -0.87209300  
H 6.47796000 1.05286500 -1.31622900  
H 7.20834300 -0.12659300 -0.20033600  
C 6.31226400 -0.99080500 -1.99298700  
H 7.23787400 -0.89403300 -2.59698100  
H 6.27428700 -2.03377700 -1.61685400  
H 5.45046000 -0.83422800 -2.67545900  
C 5.73208500 -1.72373500 1.62438200  
H 5.89042800 -1.02253400 2.46949200  
H 5.33960600 -2.67107600 2.04947500  
H 6.72082000 -1.95089000 1.17437300  
C 5.03411500 2.62303600 0.24266600  
H 4.94500500 3.39855800 1.03146800  
H 5.94006000 2.86582200 -0.34995400  
H 4.15166700 2.71250800 -0.42417600  
O 2.98812400 0.50316800 -1.52615300  
H 3.90952200 0.33757100 -0.94428100  
H 2.86634600 -0.30973900 -2.06038700

<sup>os</sup>IM7

BP86/BS1 SCF energy in solution: -2518.298448 a.u.

BP86/BS2 SCF energy in solution: -2519.851006 a.u.

BP86/BS2 Free energy in solution: -2519.290381 a.u.

2 1

Co 1.28687900 0.00630900 0.00530400

N 1.27071400 0.66688500 1.91728000

N 1.53661700 -1.86216600 0.71564700



C -0.09145100 0.89521400 2.45998500  
C 0.60289400 -2.92252300 0.27213100  
C 2.92908000 -2.08735500 0.21055700  
C 2.05240800 1.94263800 1.86934200  
C 1.99005800 -0.40489100 2.67641300  
C 1.50065100 -1.76862700 2.21239400  
N 1.72139200 1.86157600 -0.58715800  
N 2.26427400 -0.64641800 -1.73012400  
C 0.90699100 2.48611000 -1.65884300  
C 1.35491700 -0.95143300 -2.86532900  
C 2.98964500 -1.89776500 -1.30326500  
C 1.65428400 2.72944900 0.63267100  
C 3.13358200 1.61009800 -1.02679100  
C 3.17599400 0.50388600 -2.08502200  
H 3.07472000 -0.28804400 2.48238900  
H 1.83760900 -0.28833500 3.77231000  
H 0.45026700 -1.93251000 2.52186600  
H 2.10733400 -2.58259700 2.66747600  
H -0.69105200 1.48551800 1.74131000  
H -0.60835500 -0.07153100 2.60207900  
H -0.02901300 1.41686800 3.44003200  
H 1.88205100 2.54603200 2.78817200  
H 3.12906100 1.68194600 1.84498500  
H 0.60896100 3.08513800 0.71639700  
H 2.30029400 3.62643300 0.50557000  
H 1.18344400 3.55711600 -1.77343900  
H 1.07609700 1.98016800 -2.62587400  
H -0.16065200 2.37778400 -1.38106000  
H 3.59118500 2.54571100 -1.42221000  
H 3.71625600 1.30895000 -0.13344800  
H 4.22037600 0.14956900 -2.20216800  
H 2.86118500 0.89892700 -3.07003500  
H 0.77803000 -0.04978600 -3.14041600  
H 1.93141600 -1.29434700 -3.75371600  
H 0.64206300 -1.74364000 -2.57031000  
H 4.04896600 -1.86762300 -1.63134600  
H 2.52011700 -2.75826900 -1.81791100  
H 3.59230200 -1.35615500 0.71508300  
H 3.28430100 -3.10611400 0.48949200  
H -0.42689400 -2.63046900 0.54900600  
H 0.64759100 -3.05607600 -0.82311100  
H 0.85895800 -3.88965900 0.75846400  
O -0.53485700 -0.20254100 -0.39420200  
O -1.36414400 0.89053800 -0.38860500

H -2.74312100 0.40981700 -0.25929500  
N -3.83371600 0.08323600 -0.25481100  
C -3.91142600 -0.99672600 -1.30636200  
H -3.59653500 -0.51186300 -2.25233700  
H -3.13359400 -1.74208700 -1.05176800  
C -4.63945600 1.29523700 -0.64865900  
H -4.36947700 1.50509300 -1.70312700  
H -5.71315800 1.01806500 -0.62482800  
C -4.15209000 -0.38639400 1.13910000  
H -3.95809400 0.47813900 1.80264800  
H -5.23912500 -0.60622600 1.19073600  
C -3.31472100 -1.57872900 1.58788400  
H -3.48739200 -1.74934200 2.66986900  
H -3.58139000 -2.51448500 1.05693500  
H -2.23268900 -1.38443600 1.43803100  
C -5.27032400 -1.66961900 -1.46502200  
H -6.06708100 -0.95815100 -1.76200600  
H -5.19287100 -2.43143600 -2.26773900  
H -5.59315200 -2.19464900 -0.54300900  
C -4.38018300 2.52667600 0.21313700  
H -4.91478700 3.38746200 -0.23814700  
H -4.75599700 2.41644700 1.25005700  
H -3.30193900 2.78506000 0.25187700

<sup>3</sup>IM7

BP86/BS1 SCF energy in solution: -2594.685911 a.u.

BP86/BS2 SCF energy in solution: -2596.343646 a.u.

BP86/BS2 Free energy in solution: -2595.764082 a.u.

2 3

Co 1.88294400 -0.02165400 0.02035800  
N 2.32592500 1.90756100 -0.57261300  
N 2.81473300 0.39414800 1.75386400  
C 1.17449300 2.82577900 -0.39750200  
C 2.08646800 0.11795700 3.01336000  
C 4.01301300 -0.49133300 1.58558200  
C 2.69571100 1.76884200 -2.00974900  
C 3.47434200 2.30110700 0.29283700  
C 3.20218300 1.84340600 1.71951300  
N 1.65415800 -0.49021100 -1.91092800  
N 2.48710600 -2.00366500 0.29936200  
C 0.42704700 -1.21219900 -2.32418600  
C 1.39076800 -2.87137000 0.80857300  
C 3.59442000 -1.93469200 1.31929300

C 1.73999400 0.79354500 -2.68098600  
C 2.88614600 -1.32817200 -2.08695900  
C 2.91889000 -2.46931500 -1.06898900  
H 4.38610800 1.81947500 -0.11275200  
H 3.64521800 3.40117700 0.26736900  
H 2.35620900 2.41183000 2.15274100  
H 4.08619500 2.02287800 2.37077600  
H 0.25972500 2.38113600 -0.83339900  
H 0.97735700 2.98240900 0.67883500  
H 1.39259500 3.80916900 -0.87101600  
H 2.66919400 2.75253200 -2.53058700  
H 3.73972800 1.40091300 -2.05971500  
H 0.71606400 1.21503100 -2.71229400  
H 2.04794400 0.59252000 -3.73143400  
H 0.37513200 -1.28202100 -3.43298700  
H 0.42010300 -2.23732800 -1.91212100  
H -0.44287600 -0.65716600 -1.91884700  
H 2.93657800 -1.72911900 -3.12512000  
H 3.76584900 -0.67082200 -1.94141100  
H 3.94285500 -2.89323300 -1.02901300  
H 2.24650200 -3.29204900 -1.38169300  
H 0.54419200 -2.86678700 0.09750500  
H 1.74470100 -3.91874700 0.94036200  
H 1.02982300 -2.48960900 1.78160100  
H 4.47465200 -2.52085700 0.98350400  
H 3.23177600 -2.41116900 2.25075900  
H 4.59617300 -0.10412700 0.72650400  
H 4.66817400 -0.43454500 2.48528200  
H 1.14073900 0.69106100 3.01038500  
H 1.84550600 -0.95629000 3.10072200  
H 2.70032200 0.41657100 3.89176300  
O 0.14038800 0.15602600 0.68453900  
O -0.91270400 0.43236700 -0.13261300  
H -2.08949600 0.70028800 0.77766600  
N -5.08725400 0.04625000 0.04710900  
C -4.72488400 -1.34171100 -0.42983300  
H -3.77872600 -1.22045000 -0.99413900  
H -4.48471200 -1.93080100 0.47687000  
C -5.17479700 1.03214300 -1.09554800  
H -4.29673000 0.82145600 -1.73792600  
H -6.08731300 0.79704900 -1.67907800  
C -6.30417800 0.09877600 0.93662700  
H -6.40509700 1.15441300 1.25311100  
H -7.18696200 -0.14560000 0.31129400

C -6.21787900 -0.80486600 2.16062300  
H -7.09761000 -0.60326000 2.80508900  
H -6.23541000 -1.88275700 1.90367000  
H -5.30996500 -0.59826800 2.76414600  
C -5.78165400 -2.04249400 -1.27308300  
H -6.01529300 -1.49215100 -2.20689000  
H -5.38951700 -3.03790000 -1.56597400  
H -6.72599200 -2.21093400 -0.71685500  
C -5.15920200 2.48904600 -0.64309300  
H -5.03838100 3.13425000 -1.53686300  
H -6.09846300 2.79575100 -0.14110000  
H -4.30892600 2.68709400 0.04115600  
O -2.92981500 0.88770500 1.37686000  
H -4.22233700 0.36397800 0.64469500  
H -2.75600200 0.38557500 2.19899300

<sup>5</sup>IM7

BP86/BS1 SCF energy in solution: -2594.676973 a.u.

BP86/BS2 SCF energy in solution: -2596.333084 a.u.

BP86/BS2 Free energy in solution: -2595.757829 a.u.

2 5

Co -1.66767400 -0.01044400 -0.12201600  
N -2.50599300 1.93398500 0.39243100  
N -2.92236900 0.22648400 -1.85849000  
C -1.37795000 2.86955300 0.16966000  
C -2.28193200 -0.15486600 -3.13575300  
C -4.04242400 -0.68556800 -1.49474500  
C -2.92302400 1.90254600 1.81783700  
C -3.64055100 2.21229800 -0.52805400  
C -3.36310700 1.64679500 -1.91793600  
N -1.74636300 -0.28715000 2.04898000  
N -2.41970700 -2.06203300 -0.13851300  
C -0.52557700 -0.89619500 2.61279300  
C -1.32534000 -2.96247500 -0.58290100  
C -3.54479200 -2.08559900 -1.12984400  
C -1.96666300 1.05295400 2.65047100  
C -2.93635100 -1.16681300 2.17051600  
C -2.82485300 -2.39743900 1.26693700  
H -4.54966800 1.75420100 -0.09113800  
H -3.83723000 3.30610300 -0.60338700  
H -2.55228800 2.21720900 -2.41390800  
H -4.27052400 1.75486900 -2.55632800

H -0.47957300 2.52764000 0.71971100  
H -1.11609300 2.89691600 -0.90535400  
H -1.64937300 3.89882600 0.49882900  
H -2.97164800 2.93140700 2.24213300  
H -3.94996500 1.48882800 1.85879200  
H -0.97567900 1.54465500 2.72090500  
H -2.35634400 0.96449700 3.69157900  
H -0.58794200 -0.96929800 3.72332700  
H -0.37267800 -1.91178300 2.20307100  
H 0.34822000 -0.27600700 2.33106800  
H -3.08118500 -1.49823300 3.22653300  
H -3.82958000 -0.57391100 1.89046400  
H -3.79473500 -2.93806300 1.27214600  
H -2.07160100 -3.09760400 1.67857400  
H -0.46846500 -2.87890200 0.11147600  
H -1.66414400 -4.02323200 -0.61275900  
H -0.98741500 -2.67254500 -1.59609200  
H -4.39729000 -2.68005600 -0.73811100  
H -3.18645100 -2.60882800 -2.03827700  
H -4.57511600 -0.24251700 -0.63037900  
H -4.77506500 -0.75884000 -2.33278700  
H -1.43892000 0.53307600 -3.33986300  
H -1.88466700 -1.18557100 -3.08486200  
H -3.00619800 -0.09586300 -3.98106400  
O 0.15770200 -0.14293700 -0.43705600  
O 1.06210000 0.67165000 0.12901900  
H 2.26391600 0.90842400 -0.89956900  
N 5.13435800 0.06257700 -0.06468700  
C 4.58372000 -1.27235500 0.38721100  
H 3.60538600 -1.04008900 0.85274800  
H 4.37292100 -1.84865000 -0.53465600  
C 5.23926800 1.04972400 1.07747600  
H 4.30110900 0.93761300 1.65645400  
H 6.08072200 0.72963900 1.72377200  
C 6.41658200 -0.02725700 -0.85674700  
H 6.64457800 1.00563000 -1.18223200  
H 7.21716500 -0.34049300 -0.15618100  
C 6.33624500 -0.94991400 -2.06652500  
H 7.27634000 -0.84542500 -2.64548600  
H 6.23624500 -2.01829000 -1.78924300  
H 5.49790200 -0.67704000 -2.74044100  
C 5.47623900 -2.06148100 1.33448500  
H 5.68483500 -1.51474300 2.27611200  
H 4.95085500 -2.99961600 1.60654000

H 6.44173100 -2.34631300 0.86922300  
C 5.40569100 2.49330100 0.61513600  
H 5.30205900 3.15925900 1.49570400  
H 6.40018600 2.69142200 0.16796500  
H 4.62203300 2.77262200 -0.11872400  
O 3.07625400 1.06663600 -1.50351000  
H 4.35980800 0.45408600 -0.71872600  
H 2.87202700 0.56388600 -2.31891000

<sup>os</sup>IM8

BP86/BS1 SCF energy in solution: -2225.614238 a.u.

BP86/BS2 SCF energy in solution: -2226.828328 a.u.

BP86/BS2 Free energy in solution: -2226.467948 a.u.

1 1

Co -0.00890400 0.02084300 0.20257800  
N -1.59470700 1.14126700 -0.47802900  
N 1.14973300 1.66502800 -0.00747600  
C -2.45020500 1.62741600 0.62913600  
C 1.96375800 2.08660000 1.15281100  
C 1.99021900 1.20733900 -1.15771000  
C -2.33490900 0.20068600 -1.36338800  
C -0.95162100 2.26571200 -1.21422300  
C 0.23942800 2.78373200 -0.41144100  
N -1.02375500 -1.63572700 -0.30921200  
N 1.75520900 -1.10935100 -0.20867100  
C -1.15344100 -2.71434100 0.69590000  
C 2.37438600 -1.67038600 1.01777400  
C 2.68481300 -0.12243400 -0.85234300  
C -2.38988600 -1.17424400 -0.70954800  
C -0.19915100 -2.04500300 -1.49104100  
C 1.27601300 -2.21475400 -1.10694500  
H -0.62733600 1.88452800 -2.20352000  
H -1.67131000 3.09477800 -1.40416900  
H -0.10707500 3.27120600 0.52167900  
H 0.79732900 3.55381100 -0.99102900  
H -2.63749500 0.80917700 1.35282000  
H -1.92736900 2.42975500 1.18158100  
H -3.40877000 2.03257800 0.23317800  
H -3.36693500 0.56569100 -1.57082800  
H -1.80525600 0.15416800 -2.33601600  
H -2.99588400 -1.13389600 0.21731200  
H -2.87111100 -1.91528000 -1.38760100  
H -1.89174200 -3.47714100 0.36293300

H -0.18184600 -3.21739800 0.85040900  
H -1.46747200 -2.23618100 1.65006600  
H -0.59305700 -2.98766800 -1.93700800  
H -0.29619100 -1.25071700 -2.25802100  
H 1.88680700 -2.26284900 -2.03278100  
H 1.42672000 -3.17768100 -0.57937400  
H 1.65948700 -2.34007200 1.53100500  
H 3.29723000 -2.24861500 0.78011200  
H 2.63523300 -0.85298200 1.71543500  
H 3.11234700 -0.53358900 -1.79129700  
H 3.53809000 0.04365900 -0.16563200  
H 1.32118100 1.09539400 -2.03436700  
H 2.74741400 1.98274800 -1.42056600  
H 1.29645900 2.20530900 2.02775000  
H 2.72285400 1.32061300 1.39510200  
H 2.48726300 3.04667700 0.94589100  
O -1.22509600 -0.40825000 2.66825700  
O -0.16752100 0.12959400 2.05263700

<sup>3</sup>IM8

BP86/BS1 SCF energy in solution: -2225.619388 a.u.

BP86/BS2 SCF energy in solution: -2226.833383 a.u.

BP86/BS2 Free energy in solution: -2226.473537 a.u.

1 3

Co 0.01248000 0.00643200 0.22700000  
N -1.26769300 1.51041200 -0.50571900  
N 1.53400600 1.32670400 -0.00081500  
C -1.98250900 2.18638900 0.59995300  
C 2.43496900 1.54107900 1.15134300  
C 2.22847300 0.67960700 -1.15885600  
C -2.20427800 0.77115500 -1.38646500  
C -0.35254000 2.43466700 -1.22184900  
C 0.91986400 2.63379300 -0.39967000  
N -1.39880300 -1.33447800 -0.30405400  
N 1.42343900 -1.50734700 -0.22475700  
C -1.81333700 -2.35046700 0.68886100  
C 1.87002500 -2.18569900 1.01805000  
C 2.57037900 -0.78532300 -0.87136300  
C -2.59982800 -0.54255500 -0.71864500  
C -0.70332500 -1.93600700 -1.48614400  
C 0.68550600 -2.46627400 -1.11291400  
H -0.12087900 1.98855100 -2.20969300  
H -0.83037500 3.42316300 -1.41623100

H 0.68695400 3.17745900 0.53753400  
H 1.65488800 3.25352400 -0.96176800  
H -2.39481200 1.43824200 1.30533200  
H -1.27640400 2.81237900 1.17667100  
H -2.79673000 2.83539000 0.20300800  
H -3.12028000 1.36780300 -1.60597000  
H -1.69665100 0.58968200 -2.35521600  
H -3.18071200 -0.34161400 0.20373100  
H -3.24902200 -1.14703100 -1.39222600  
H -2.71597400 -2.90033400 0.34080600  
H -1.00357700 -3.08464900 0.85434900  
H -2.01312200 -1.81727600 1.64315500  
H -1.32181700 -2.74974500 -1.93120200  
H -0.60092900 -1.14310500 -2.25336100  
H 1.25904300 -2.66068200 -2.04312600  
H 0.60314800 -3.43715300 -0.58483200  
H 1.00101000 -2.63081900 1.53759900  
H 2.60761400 -2.99162100 0.79739400  
H 2.33499000 -1.45071500 1.70056300  
H 2.86352500 -1.28138700 -1.82031700  
H 3.44677100 -0.85114800 -0.19667500  
H 1.54401200 0.73786300 -2.02924300  
H 3.15088800 1.24601800 -1.42623100  
H 1.82578400 1.82652200 2.03003400  
H 2.98710400 0.61548000 1.39678100  
H 3.17509400 2.34349700 0.93382000  
O -1.26683800 -0.13569000 2.71178400  
O -0.17235300 0.23679000 2.04695200

<sup>o</sup>STs4

BP86/BS1 SCF energy in solution: -2225.607643 a.u.

BP86/BS2 SCF energy in solution: -2226.821542 a.u.

BP86/BS2 Free energy in solution: -2226.461859 a.u.

l 1

Co -0.00354800 0.03872100 0.40015200  
N -1.33906500 -1.55767000 -0.37135700  
N -1.52973900 1.32021500 -0.14420500  
C -1.96386400 -2.33391000 0.71567200  
C -1.89513000 2.33399200 0.86869000  
C -0.96205900 1.93700000 -1.37849300  
C -0.46247600 -2.41438100 -1.20489600  
C -2.35152600 -0.81530900 -1.15556200  
C -2.72692800 0.48403300 -0.44979100



N 1.55112500 -1.29586600 -0.22568700  
N 1.30277200 1.55268300 -0.35972200  
C 2.64434700 -1.51738100 0.74056200  
C 1.91017900 2.24414700 0.80789900  
C 0.43741700 2.50303000 -1.13387800  
C 0.90214700 -2.59635500 -0.54692600  
C 2.02526900 -0.59382500 -1.45310200  
C 2.36868100 0.86913700 -1.16626700  
H -1.92591300 -0.60494200 -2.15675500  
H -3.27294800 -1.42151200 -1.32144100  
H -3.22458800 0.26564000 0.51667600  
H -3.45512200 1.05938900 -1.06689300  
H -1.18800700 -2.80930900 1.34493900  
H -2.55894300 -1.66907000 1.36877800  
H -2.63010200 -3.12728400 0.30229700  
H -0.92070900 -3.41573900 -1.38225600  
H -0.35527800 -1.93723600 -2.19949600  
H 0.79371600 -3.14784400 0.40887700  
H 1.55956300 -3.21390000 -1.20337800  
H 3.36520000 -2.27997900 0.36381500  
H 3.19411600 -0.57615700 0.92290400  
H 2.20939300 -1.84791900 1.70305500  
H 2.91372600 -1.11181700 -1.88744500  
H 1.21702400 -0.64368900 -2.20886100  
H 2.53591200 1.40153500 -2.12628400  
H 3.31916600 0.93364200 -0.60019200  
H 2.49018500 1.52076800 1.40977800  
H 2.58349700 3.06971100 0.48031700  
H 1.11520400 2.66506500 1.45192700  
H 0.90411100 2.75072300 -2.11028300  
H 0.37446300 3.45230700 -0.56569000  
H -0.91690300 1.15197400 -2.15817100  
H -1.63620500 2.74044600 -1.75877900  
H -2.15016900 1.81941800 1.81473500  
H -1.04989600 3.01929500 1.06388400  
H -2.76671700 2.93944800 0.53081900  
O 0.60233300 -0.18282500 2.68365800  
O -0.58733100 -0.16280400 2.07913900

<sup>3</sup>TS4

BP86/BS1 SCF energy in solution: -2225.615056 a.u.

BP86/BS2 SCF energy in solution: -2226.828753 a.u.

BP86/BS2 Free energy in solution: -2226.470763 a.u.

1 3

C 0.04907400 -0.02811300 0.42655200  
N 0.27279400 2.02430800 -0.40253600  
N 2.01594400 -0.28156400 -0.14573600  
C 0.33618900 3.02234300 0.68300000  
C 2.88480400 -0.94182300 0.85243600  
C 1.85828200 -1.10708300 -1.38060800  
C -0.91707600 2.23960500 -1.25893000  
C 1.54303700 1.96472200 -1.16145500  
C 2.55833400 1.07573300 -0.44651700  
N -2.02821300 0.23434800 -0.24652100  
N -0.24205900 -2.02639000 -0.35351400  
C -3.08511500 -0.14781000 0.70736400  
C -0.36044500 -2.89361200 0.84664300  
C 0.99844100 -2.34947000 -1.12764200  
C -2.17661900 1.66777900 -0.60959900  
C -2.02483900 -0.63740700 -1.45340600  
C -1.51263700 -2.04685100 -1.14352100  
H 1.32279000 1.57178800 -2.17424100  
H 1.98644800 2.97789900 -1.30482000  
H 2.84440500 1.52776800 0.52476700  
H 3.48884200 0.99487300 -1.05445400  
H -0.56562000 2.95563400 1.32073400  
H 1.21376200 2.83091400 1.32759600  
H 0.40864000 4.05519800 0.26752800  
H -1.07591200 3.32351700 -1.47010400  
H -0.72621400 1.75221300 -2.23578000  
H -2.40774600 2.21813000 0.32518600  
H -3.04665300 1.81754500 -1.29249200  
H -4.09998300 0.05658300 0.29113100  
H -3.01825100 -1.22483800 0.94977000  
H -2.94377300 0.42108200 1.64620000  
H -3.04616100 -0.69952000 -1.90048000  
H -1.36744000 -0.16936900 -2.21274300  
H -1.37396800 -2.60046400 -2.09648400  
H -2.27082300 -2.60775300 -0.56113100  
H -1.21474000 -2.55888800 1.46497200  
H -0.50856900 -3.96237100 0.56657300  
H 0.55578300 -2.81178300 1.46249300  
H 0.74374300 -2.81465200 -2.10321600  
H 1.57582800 -3.10609300 -0.55933500  
H 1.37628800 -0.47326700 -2.15024800  
H 2.85666700 -1.40673100 -1.77705900  
H 2.85044200 -0.36814500 1.79797800

H 2.53593000 -1.97125000 1.05470700  
H 3.93715400 -0.99118500 0.49161000  
O -0.68459100 0.02037300 2.75234100  
O 0.42218400 0.39094700 2.10715800

<sup>CS</sup>[Co]O<sub>2</sub><sup>+</sup>

BP86/BS1 SCF energy in solution: -2225.64189 a.u.  
BP86/BS2 SCF energy in solution: -2226.85683 a.u.  
BP86/BS2 Free energy in solution: -2226.492891 a.u.

1 1

Co 0.00001200 -0.00000100 0.42964500  
O 0.00543400 -0.71245500 2.17625500  
N 0.05443000 1.69714500 -0.70146200  
O -0.00497500 0.71245300 2.17627900  
N -0.05453700 -1.69716700 -0.70143900  
N 2.03855900 -0.04742200 0.17431800  
N -2.03859300 0.04741700 0.17444200  
C -2.41617400 -1.09274800 -0.74230600  
H -2.77007100 -1.92425000 -0.10411500  
H -3.27050800 -0.79753100 -1.38806900  
C 1.24300600 -1.79189900 -1.42157500  
H 1.20282700 -1.13019700 -2.30729600  
H 1.42512800 -2.82647600 -1.79142600  
C 0.22015800 2.87735100 0.19164600  
H 1.10965000 2.75847400 0.83381900  
H -0.65503300 2.97658300 0.85699800  
H 0.32415500 3.80227300 -0.41886400  
C -1.24318500 1.79191700 -1.42151900  
H -1.20303100 1.13028800 -2.30729600  
H -1.42531000 2.82652700 -1.79126300  
C -1.23525300 -1.55554700 -1.58933300  
H -1.48465900 -2.51880600 -2.09238000  
H -0.98061500 -0.82523200 -2.38041000  
C 1.23508100 1.55554900 -1.58941700  
H 1.48449300 2.51881300 -2.09244200  
H 0.98042900 0.82523900 -2.38050100  
C 2.34412900 -1.37479900 -0.45819200  
H 2.43572100 -2.11404800 0.36115100  
H 3.32918300 -1.33643400 -0.97263900  
C -0.22020700 -2.87738600 0.19163700  
H -0.32427000 -3.80227800 -0.41889500  
H -1.10963600 -2.75851900 0.83389400  
H 0.65504400 -2.97664500 0.85690700

C -2.34423000 1.37479700 -0.45804600  
H -2.43575000 2.11406100 0.36129700  
H -3.32935000 1.33641100 -0.97237100  
C 2.41605800 1.09275900 -0.74248100  
H 3.27032900 0.79754400 -1.38832400  
H 2.76998200 1.92425200 -0.10429600  
C -2.79224400 -0.06085900 1.44815100  
H -2.43240800 0.73460700 2.12665800  
H -2.57005400 -1.03566100 1.91766600  
H -3.88574700 0.03837300 1.26916500  
C 2.79244800 0.06088500 1.44789700  
H 2.43278900 -0.73461500 2.12645100  
H 2.57026400 1.03565600 1.91746400  
H 3.88591100 -0.03829800 1.26866000

$^3[\text{Co}]\text{O}_2^+$

BP86/BS1 SCF energy in solution: -2225.633266 a.u.

BP86/BS2 SCF energy in solution: -2226.84707 a.u.

BP86/BS2 Free energy in solution: -2226.489037 a.u.

1 3

Co -0.00164700 -0.02288500 0.55157700  
O 0.00462300 -0.74775900 2.21757400  
N 0.03740800 1.68712700 -0.66906400  
O -0.00354800 0.60920200 2.37669200  
N -0.03683800 -1.67681500 -0.69506100  
N 2.22308100 -0.01436100 0.11740800  
N -2.22402600 0.04561300 0.11744200  
C -2.46403200 -1.10924200 -0.79263700  
H -2.80938200 -1.95734700 -0.16933600  
H -3.28944600 -0.88735900 -1.50803200  
C 1.24583300 -1.72062000 -1.45138900  
H 1.15771200 -1.03940600 -2.31796300  
H 1.42316200 -2.74136400 -1.86081400  
C 0.16625500 2.85933500 0.23709100  
H 1.06452300 2.76328900 0.87262000  
H -0.71372800 2.92347400 0.90198500  
H 0.24067800 3.79874000 -0.35678300  
C -1.24245200 1.77116300 -1.42430000  
H -1.16345800 1.11640600 -2.31219400  
H -1.40646500 2.80633300 -1.80266400  
C -1.22029600 -1.53388900 -1.58361800  
H -1.43529400 -2.49347200 -2.10929700  
H -0.96363500 -0.79211600 -2.36249400

C 1.22185300 1.58948400 -1.56042400  
H 1.42789800 2.56955000 -2.05134200  
H 0.97535200 0.87285400 -2.36625000  
C 2.42147200 -1.32291200 -0.55749200  
H 2.55873000 -2.08470900 0.23628300  
H 3.35698700 -1.32139000 -1.16567400  
C -0.16657000 -2.89203600 0.15092900  
H -0.24513400 -3.80023800 -0.48857900  
H -1.06291000 -2.82369800 0.79324800  
H 0.71579200 -2.99060000 0.80926900  
C -2.42184800 1.36209300 -0.54073000  
H -2.56336000 2.11143300 0.26375400  
H -3.35582400 1.36768900 -1.15124600  
C 2.46627100 1.15145700 -0.77759800  
H 3.29145500 0.93648900 -1.49522800  
H 2.81449500 1.98940100 -0.14230700  
C -3.06316700 -0.04889600 1.32710700  
H -2.78070500 0.75780500 2.03100600  
H -2.88564700 -1.01984300 1.82809100  
H -4.15040600 0.03920400 1.09223100  
C 3.06101400 0.07063500 1.32845400  
H 2.82531500 -0.77955400 1.99725400  
H 2.83543900 1.00832600 1.87204300  
H 4.15035300 0.04605800 1.08827700

$^5[\text{Co}]\text{O}_2^+$

BP86/BS1 SCF energy in solution: -2225.618833 a.u.

BP86/BS2 SCF energy in solution: -2226.831612 a.u.

BP86/BS2 Free energy in solution: -2226.476296 a.u.

1 5

Co -0.00003100 0.04003800 0.48157900  
O 0.00318600 0.25888900 2.34306900  
N 0.00209400 1.57851500 -1.00689300  
O 0.00788900 1.56166500 2.61054000  
N -0.00369300 -1.91051800 -0.35728300  
N 2.18538500 -0.04220800 0.07519800  
N -2.18595500 -0.03606100 0.07740400  
C -2.44629700 -1.40262600 -0.46042600  
H -2.72957600 -2.04122900 0.39965100  
H -3.31790700 -1.39926200 -1.15481200  
C 1.23259200 -2.02356500 -1.17631500  
H 1.04213200 -1.51217200 -2.13960000  
H 1.45472900 -3.08958600 -1.41686100

C 0.00492300 2.91969700 -0.38205400  
H 0.89649400 3.03713700 0.26042800  
H -0.88709300 3.04143900 0.25904400  
H 0.00730300 3.71542100 -1.16254000  
C -1.23480700 1.35397100 -1.80347500  
H -1.04334200 0.50723400 -2.48964200  
H -1.46250600 2.24095200 -2.43950400  
C -1.24011100 -2.01957500 -1.17636000  
H -1.46563300 -3.08493900 -1.41674200  
H -1.04750800 -1.50916300 -2.13964300  
C 1.23672300 1.34992800 -1.80569400  
H 1.46640900 2.23650700 -2.44157200  
H 1.04104900 0.50432200 -2.49206700  
C 2.44069600 -1.41058800 -0.46038000  
H 2.72063600 -2.04897600 0.40097000  
H 3.31291000 -1.41175000 -1.15401500  
C -0.00566100 -2.87719200 0.76437600  
H -0.00680500 -3.92495200 0.38463800  
H -0.90039500 -2.72838500 1.39794100  
H 0.88865300 -2.73056400 1.39898200  
C -2.43413700 1.06119200 -0.90053900  
H -2.68198600 1.96989800 -0.31633200  
H -3.32400200 0.83587100 -1.53276100  
C 2.43652000 1.05274000 -0.90465300  
H 3.32414500 0.82264000 -1.53828600  
H 2.68954000 1.96101600 -0.32202700  
C -2.98549000 0.19520300 1.30101700  
H -2.68140100 1.15368700 1.76442400  
H -2.79522800 -0.61605800 2.02940000  
H -4.07892200 0.22731700 1.08237100  
C 2.98626400 0.18847100 1.29802300  
H 2.79512100 -0.62210200 2.02693600  
H 2.68373200 1.14752300 1.76135000  
H 4.07959500 0.21866100 1.07866600

<sup>o</sup>TS5a

BP86/BS1 SCF energy in solution: -2378.818918 a.u.

BP86/BS2 SCF energy in solution: -2380.236674 a.u.

BP86/BS2 Free energy in solution: -2379.827924 a.u.

2 1

Co 0.54063800 0.01924800 -0.01145100

N -0.49327700 1.48349700 -0.92329100

N 1.96219700 1.35415200 0.45351500

C -1.55520200 2.14544800 -0.12998100  
C 2.33096700 1.54513100 1.87783400  
C 3.07405700 0.73734100 -0.34264300  
C -1.05040300 0.80168000 -2.13973900  
C 0.59248700 2.45092000 -1.29805700  
C 1.51040200 2.67199800 -0.10933400  
N -0.60241000 -1.33113900 -0.94550900  
N 1.94287500 -1.44049300 0.25152500  
C -1.32153300 -2.37838600 -0.17584700  
C 1.94521600 -2.15394200 1.55985400  
C 3.26968500 -0.72190200 0.07154800  
C -1.60502700 -0.55880300 -1.75510500  
C 0.51068500 -1.90116600 -1.77365800  
C 1.62697200 -2.42033800 -0.86533400  
H 1.14729100 2.02091200 -2.15533600  
H 0.15344000 3.41327400 -1.64012400  
H 0.97533600 3.20330800 0.70106200  
H 2.38809200 3.29299600 -0.39151100  
H -2.36170400 1.43121800 0.12422700  
H -1.13288700 2.54426300 0.80983900  
H -1.99423600 2.97897900 -0.71990800  
H -1.83984800 1.42616000 -2.61127500  
H -0.22859400 0.70244400 -2.87498900  
H -2.51245600 -0.44981900 -1.12936500  
H -1.89349500 -1.13835700 -2.65938600  
H -1.93761900 -2.98956600 -0.87048400  
H -0.61719000 -3.05301700 0.34022900  
H -1.97349000 -1.90225300 0.57924300  
H 0.13542700 -2.71685700 -2.43242700  
H 0.88983100 -1.09141700 -2.43176400  
H 2.53566400 -2.61606100 -1.46803200  
H 1.33532600 -3.38083000 -0.39992400  
H 0.95907600 -2.61757500 1.74713800  
H 2.72058000 -2.95018700 1.56283500  
H 2.17412800 -1.44495100 2.37843800  
H 3.88628000 -1.24502800 -0.68593400  
H 3.81733700 -0.78247800 1.03090700  
H 2.79675800 0.80586100 -1.41434500  
H 4.01815500 1.31041800 -0.20406700  
H 1.43838000 1.87640500 2.43891000  
H 2.70889900 0.61042300 2.32830900  
H 3.12566000 2.31830400 1.95706900  
O -0.36504200 0.11713500 1.72564600  
O -4.41668500 0.62788600 0.91622500

H -1.46019800 -0.16585400 1.92157000  
O -4.76630700 -0.35911300 -0.03148900  
H -5.50883400 0.07801700 -0.51390500  
O -2.67395500 -0.51615500 2.19524000  
H -2.85240400 -0.38642600 3.14937200  
H -3.49792800 0.02505600 1.61191600  
H 0.14836700 -0.35510700 2.41501700

<sup>3</sup>TS5a

BP86/BS1 SCF energy in solution: -2378.82212 a.u.  
BP86/BS2 SCF energy in solution: -2380.240114 a.u.  
BP86/BS2 Free energy in solution: -2379.832401 a.u.

2 3

Co 0.48698300 0.01435300 0.06528400  
N -0.37476400 1.53881100 -0.97432900  
N 1.94534800 1.31440700 0.57952800  
C -1.46506200 2.17577000 -0.19491000  
C 2.28417100 1.46172500 2.01712200  
C 3.07675800 0.70344200 -0.20021100  
C -0.89876200 0.90597700 -2.22706100  
C 0.74328800 2.49871300 -1.24211700  
C 1.56944400 2.66100000 0.02213300  
N -0.58920200 -1.26686000 -1.05951600  
N 1.91342000 -1.47873700 0.21281100  
C -1.36152300 -2.35806700 -0.41358400  
C 1.81376100 -2.26523400 1.47492200  
C 3.24760000 -0.76373800 0.17070900  
C -1.52896200 -0.43299300 -1.88442500  
C 0.54973200 -1.80640800 -1.87569000  
C 1.64564400 -2.37736200 -0.97724100  
H 1.35117500 2.08806300 -2.07193600  
H 0.34305500 3.48049900 -1.57705600  
H 0.98722900 3.18531400 0.80455300  
H 2.48369700 3.26330700 -0.16981900  
H -2.24791700 1.44179900 0.08009900  
H -1.06274300 2.61732600 0.73497800  
H -1.93093700 2.98037800 -0.80468100  
H -1.63929600 1.57221900 -2.72006100  
H -0.04814600 0.78389200 -2.92550900  
H -2.44822600 -0.29151700 -1.28285600  
H -1.81560600 -0.98508300 -2.80632600  
H -1.90239600 -2.93866000 -1.19242200  
H -0.69082100 -3.04694800 0.12800900



H -2.08627600 -1.93538200 0.30685000  
H 0.17933800 -2.58458000 -2.58039900  
H 0.95344500 -0.97356900 -2.48528000  
H 2.57213100 -2.51229500 -1.56963300  
H 1.35962500 -3.37472300 -0.59138900  
H 0.82479900 -2.75275200 1.54378100  
H 2.60541200 -3.04570000 1.49462800  
H 1.94114100 -1.59576900 2.34497600  
H 3.92648900 -1.25829600 -0.55250600  
H 3.71342800 -0.86007600 1.16987100  
H 2.83317900 0.80365300 -1.27657400  
H 4.01685300 1.26905600 -0.01333400  
H 1.43291100 1.92609500 2.55060500  
H 2.51439300 0.48533800 2.47909200  
H 3.16789900 2.12706600 2.12887900  
O -0.49145000 -0.09442800 1.77448400  
O -4.27755500 0.70531600 0.98849500  
H -1.58824500 -0.44189800 1.97295300  
O -4.83837400 -0.14668100 0.00718700  
H -5.36282600 0.49245500 -0.53160800  
O -2.77396100 -0.84401200 2.12873400  
H -2.99718100 -0.93753000 3.07715000  
H -3.52013000 -0.11072200 1.63151400  
H -0.28344600 0.60966000 2.42224200

<sup>5</sup>TS5a

BP86/BS1 SCF energy in solution: -2378.806711 a.u.

BP86/BS2 SCF energy in solution: -2380.222355 a.u.

BP86/BS2 Free energy in solution: -2379.817886 a.u.

2 5

Co -0.35280800 -0.01940400 -0.18995900  
N 0.52834300 0.23930600 1.77691500  
N -0.83950600 2.08849600 0.03229400  
C 1.99724600 0.23653300 1.57923400  
C -0.56359400 2.91593500 -1.16060700  
C -2.29233100 1.97969200 0.33315600  
C 0.07308400 -0.90517200 2.61378900  
C 0.04944100 1.54649900 2.30486100  
C -0.05158700 2.58647400 1.19321500  
N -0.76027400 -1.99746600 0.53360600  
N -2.33556200 -0.12674700 -1.06808600  
C -0.42783000 -3.06527600 -0.43512600  
C -2.22011400 -0.28050500 -2.54322600

C -3.03297400 1.15971900 -0.72812200  
C 0.00894700 -2.18994400 1.79491400  
C -2.22703800 -1.87444300 0.76957900  
C -2.96310800 -1.35468400 -0.47054700  
H -0.93890100 1.37916500 2.77583500  
H 0.72800400 1.92198800 3.10358400  
H 0.95725900 2.84638100 0.81538300  
H -0.49742100 3.52342000 1.59955300  
H 2.32106400 -0.71263200 1.11262500  
H 2.28850800 1.06892300 0.91177700  
H 2.52100400 0.35560100 2.55460800  
H 0.74680900 -1.05038700 3.48793700  
H -0.92753600 -0.64947600 3.01507300  
H 1.02865600 -2.51459800 1.50705800  
H -0.43348500 -3.00799400 2.40785500  
H -0.72692700 -4.06373900 -0.04231000  
H -0.94266600 -2.89534500 -1.39840900  
H 0.66352800 -3.06368100 -0.61900200  
H -2.65842300 -2.85909900 1.06442300  
H -2.37736400 -1.18122400 1.62149200  
H -4.02089300 -1.15302700 -0.20100500  
H -2.97776300 -2.13826000 -1.25277900  
H -1.60079600 -1.16579900 -2.78326900  
H -3.22356300 -0.40520600 -3.00913600  
H -1.74219600 0.61783200 -2.97835300  
H -4.06433500 0.95697400 -0.37203700  
H -3.12945600 1.74951300 -1.66019100  
H -2.39913000 1.50135400 1.32674800  
H -2.75622900 2.99119800 0.40525500  
H 0.52330900 2.90250800 -1.37104400  
H -1.09824200 2.52542800 -2.04644000  
H -0.88131200 3.97067600 -0.99480000  
O 0.91779700 -0.06175200 -1.59744600  
O 4.91278100 0.36160300 -1.36588200  
H 2.00943900 -0.65003700 -1.61806700  
O 5.25626700 0.25329200 -0.03294200  
H 6.03116800 0.86646500 0.04684400  
O 3.03703300 -1.22738100 -1.56274100  
H 3.15558500 -1.73476400 -2.39453500  
H 3.89131700 -0.51154900 -1.48163500  
H 0.81390100 0.54312100 -2.36185500

<sup>5</sup>TS5

BP86/BS1 SCF energy in solution: -2519.578074 a.u.

BP86/BS2 SCF energy in solution: -2521.13927a.u.  
BP86/BS2 Free energy in solution: -2520.567862 a.u.

2 5

Co 1.35621900 -0.07821900 -0.02001100  
N 2.37027000 -0.21032400 -1.94459000  
N 1.45240400 2.05363400 -0.40400900  
C 1.38006400 -0.69899800 -2.93454300  
C 0.17988000 2.75724500 -0.13609500  
C 2.53356500 2.46234700 0.53483100  
C 3.50133700 -1.16636400 -1.78692200  
C 2.84506800 1.16344800 -2.27168000  
C 1.83441400 2.21689700 -1.83323500  
N 2.58844100 -1.79583400 0.45035200  
N 1.88531500 0.52583500 2.01973600  
C 1.87412000 -2.88450000 1.15237600  
C 0.69240100 0.32664300 2.88488100  
C 2.24254500 1.98245200 1.95740200  
C 3.12915700 -2.30250400 -0.84105200  
C 3.63054300 -1.15703200 1.29846900  
C 3.01239300 -0.36685600 2.45656500  
H 3.81333600 1.31676300 -1.75566500  
H 3.04074500 1.26453700 -3.36303900  
H 0.90421800 2.13396800 -2.42999500  
H 2.24888700 3.23465400 -2.01626900  
H 1.01199600 -1.69900100 -2.63919900  
H 0.51388600 -0.01342900 -2.97913000  
H 1.84580300 -0.76583700 -3.94346100  
H 3.80342100 -1.58579200 -2.77256900  
H 4.37123700 -0.60186300 -1.39769000  
H 2.34158500 -2.93879000 -1.29210100  
H 4.01709000 -2.95245200 -0.66705500  
H 2.57040900 -3.72234000 1.38364000  
H 1.43259400 -2.52417000 2.09861000  
H 1.05788600 -3.26129400 0.50783000  
H 4.33287500 -1.92248400 1.70318000  
H 4.22102300 -0.47648200 0.65356900  
H 3.80896600 0.23139300 2.94521900  
H 2.62077000 -1.06133100 3.22519600  
H 0.42250600 -0.74524400 2.91336000  
H 0.89627300 0.66975100 3.92424600  
H -0.16795400 0.89112500 2.47898600  
H 3.12355200 2.19128200 2.59958100  
H 1.39653000 2.55584200 2.38271000

H 3.48584900 2.02530200 0.17353300  
H 2.65599300 3.57049000 0.53328800  
H -0.60827100 2.34537400 -0.79340900  
H -0.13301900 2.62041800 0.91487700  
H 0.28611300 3.84817800 -0.33421100  
O -0.29415900 -0.59323800 -0.16174400  
H -1.22577700 -0.35358400 0.41941000  
N -4.58935000 -0.33147300 0.01146300  
C -5.53563500 0.11275300 1.07975200  
H -5.36187600 -0.56139900 1.94512200  
H -5.21464700 1.12385100 1.40294300  
C -4.76516500 -1.77945200 -0.30944500  
H -4.85465300 -2.30414000 0.66488800  
H -5.72767900 -1.93174200 -0.84916200  
C -4.61967300 0.51778000 -1.21491700  
H -3.82326100 0.13495300 -1.88450300  
H -5.58516500 0.36668100 -1.75112100  
C -4.37881300 2.00317400 -0.95039200  
H -4.26217400 2.53098000 -1.91920500  
H -5.21836200 2.48709600 -0.41110400  
H -3.45118500 2.16497800 -0.36329500  
C -7.02240600 0.12602300 0.71753000  
H -7.39827200 -0.87779200 0.43134100  
H -7.60668200 0.45769000 1.60096400  
H -7.24893600 0.82967400 -0.10996100  
C -3.61257200 -2.38620600 -1.11027700  
H -3.74465100 -3.48657600 -1.16037400  
H -3.57081900 -2.01444300 -2.15432300  
H -2.63445800 -2.18021100 -0.62873100  
O -2.31039100 -0.06479700 1.12354400  
H -2.32105800 -0.69582300 1.87335200  
H -3.32304400 -0.19653400 0.59546200

<sup>os</sup>IM9

BP86/BS1 SCF energy in solution: -2150.477516 a.u.

BP86/BS2 SCF energy in solution: -2151.600379 a.u.

BP86/BS2 Free energy in solution: -2151.242617 a.u.

1 1

Co -0.03077700 0.00192100 0.34945500

N -2.02770100 0.13223600 -0.24981700

N 0.13588600 1.98033200 0.00244300

C -2.92733600 0.19159100 0.92369800

C 0.71194700 2.79755300 1.09242600

C 0.98785700 1.94062200 -1.22877000  
C -2.23867800 -1.10944500 -1.03469200  
C -2.07267000 1.39187100 -1.03368500  
C -1.24482800 2.46483200 -0.32152800  
N -0.12904300 -1.98197500 0.00285600  
N 2.03951300 -0.13445400 -0.26164700  
C 0.33549500 -2.86698700 1.09225100  
C 2.90659500 -0.18676300 0.93921900  
C 2.27655500 1.12480500 -1.03352100  
C -1.56029400 -2.28235000 -0.32276800  
C 0.72278600 -2.04788300 -1.22911300  
C 2.10967400 -1.41788300 -1.02595100  
H -1.66901600 1.17986900 -2.04458900  
H -3.11716300 1.75719500 -1.16997200  
H -1.72331200 2.73995600 0.63912400  
H -1.19821600 3.39049800 -0.93934300  
H -2.79132000 -0.70683700 1.55141500  
H -2.67773900 1.06728500 1.54929600  
H -3.98953600 0.25954800 0.59272400  
H -3.32227800 -1.33291200 -1.17204900  
H -1.80974500 -0.95293600 -2.04491300  
H -2.07147500 -2.49342000 0.63730600  
H -1.63389100 -3.20657000 -0.94012700  
H 0.03886700 -3.92321200 0.90789300  
H 1.43659100 -2.82418000 1.17766200  
H -0.09582200 -2.48033700 2.03689900  
H 0.82493500 -3.10339300 -1.57312700  
H 0.18486500 -1.49610300 -2.02653800  
H 2.57685800 -1.26300800 -2.02186300  
H 2.77067600 -2.11570800 -0.47336800  
H 2.63281700 -1.05885500 1.56046500  
H 3.98356900 -0.25765000 0.65904900  
H 2.74806400 0.71790100 1.55391100  
H 2.70837200 0.90050100 -2.03198200  
H 3.03259000 1.72737800 -0.49066300  
H 0.37924500 1.47492900 -2.03047000  
H 1.23379500 2.97513100 -1.56334300  
H 0.23520300 2.47039700 2.03748800  
H 1.79894400 2.61242200 1.17651700  
H 0.55469900 3.88313300 0.90749900  
O -0.04785000 0.00429500 2.09219500

<sup>3</sup>IM9

BP86/BS1 SCF energy in solution: -2150.485428 a.u.

BP86/BS2 SCF energy in solution: -2151.607706 a.u.

BP86/BS2 Free energy in solution: -2151.252073 a.u.

1 3

Co -0.00515700 0.00027100 0.35004000  
N -2.04751200 -0.00445000 -0.26444900  
N 0.00790300 1.99316300 0.00414400  
C -2.96432800 -0.00370000 0.89210600  
C 0.51057600 2.84025900 1.10699400  
C 0.87368500 2.02211400 -1.21705800  
C -2.14873900 -1.25904500 -1.04530100  
C -2.15141000 1.24748400 -1.04927900  
C -1.40120400 2.37392400 -0.33045700  
N 0.01654700 -1.99281600 0.00419100  
N 2.03416400 0.00419900 -0.25469500  
C 0.52643500 -2.83855000 1.10481900  
C 2.89377600 0.00006700 0.95651400  
C 2.20637300 1.28410400 -1.01498500  
C -1.39190700 -2.38024600 -0.32542100  
C 0.87778700 -2.01674900 -1.22002800  
C 2.20719300 -1.26966500 -1.02548500  
H -1.71826600 1.06006700 -2.05297100  
H -3.21193100 1.55560800 -1.20695200  
H -1.90482100 2.61689500 0.62608100  
H -1.41618000 3.30098800 -0.94797300  
H -2.77821700 -0.89034800 1.52409400  
H -2.77854900 0.88387300 1.52287600  
H -4.02558600 -0.00422100 0.54939000  
H -3.20851900 -1.57170400 -1.19876200  
H -1.71967300 -1.07290400 -2.05092400  
H -1.89172300 -2.62247100 0.63332000  
H -1.40481600 -3.30921300 -0.94015300  
H 0.29573800 -3.91259500 0.92935900  
H 1.62285200 -2.72907400 1.19653900  
H 0.06317200 -2.47010700 2.04222800  
H 1.07011100 -3.06718800 -1.53890600  
H 0.30151400 -1.53239600 -2.03363600  
H 2.65192300 -1.06961900 -2.02280000  
H 2.93015800 -1.90866600 -0.47957000  
H 2.67645300 -0.89438500 1.56785500  
H 3.97382100 0.00150400 0.68110800  
H 2.67540900 0.88995800 1.57412300  
H 2.66447700 1.09493000 -2.00840500  
H 2.91800300 1.92451900 -0.45611600

H 0.30405500 1.53377600 -2.03301600  
H 1.06060400 3.07370900 -1.53538500  
H 0.04323700 2.47166400 2.04221500  
H 1.60657400 2.73202100 1.20484300  
H 0.27924700 3.91390100 0.92975000  
O -0.15587100 -0.00081100 2.07648300

<sup>5</sup>IM9

BP86/BS1 SCF energy in solution: -2150.518879 a.u.

BP86/BS2 SCF energy in solution: -2151.641118 a.u.

BP86/BS2 Free energy in solution: -2151.283836 a.u.

1 5

Co -0.00015200 0.01049800 0.61989200  
N 0.08519700 2.04986900 -0.21653000  
N 2.05140100 -0.07456400 -0.10886900  
C 0.12668600 2.97989800 0.93271100  
C 2.98911800 -0.67209200 0.86142800  
C 1.89089000 -0.90609300 -1.32859900  
C -1.14517600 2.23979600 -1.02720300  
C 1.32275700 2.13154900 -1.03487500  
C 2.45714400 1.32194000 -0.41061200  
N -2.05046200 0.09443000 -0.11060400  
N -0.08513200 -2.04943300 -0.23007900  
C -3.03717800 -0.43222400 0.85285300  
C -0.13395400 -3.01912900 0.89108300  
C 1.17119500 -2.22585100 -1.02472800  
C -2.33894800 1.52261100 -0.40001700  
C -1.95229200 -0.73888900 -1.33686400  
C -1.34120900 -2.11613300 -1.04284000  
H 1.08711500 1.74458000 -2.04672500  
H 1.65270600 3.18835000 -1.16608400  
H 2.77149900 1.78208000 0.54820100  
H 3.34543900 1.34492200 -1.08524800  
H -0.77241600 2.84205600 1.56197000  
H 1.00963300 2.76372600 1.56264700  
H 0.17260900 4.03883600 0.58594900  
H -1.38645100 3.32147100 -1.14677900  
H -0.94722500 1.84460300 -2.04331200  
H -2.60281100 1.99940100 0.56584000  
H -3.22873600 1.62674300 -1.06528900  
H -4.07452300 -0.36239200 0.44901500  
H -2.82690700 -1.49111100 1.09040800  
H -2.97267300 0.14898300 1.79238700

H -2.95393000 -0.87675400 -1.81092400  
H -1.31867400 -0.19483000 -2.06585800  
H -1.15496100 -2.63593800 -2.00737200  
H -2.07221200 -2.73793000 -0.48930500  
H -1.02625300 -2.82462500 1.51504300  
H -0.17213100 -4.07101600 0.52311000  
H 0.75978300 -2.89411100 1.53061000  
H 0.95786300 -2.74721800 -1.98314400  
H 1.84481100 -2.89209900 -0.45065600  
H 1.30654400 -0.31871100 -2.06497000  
H 2.88063600 -1.12723000 -1.79621900  
H 2.97728700 -0.07400700 1.79222600  
H 2.68684900 -1.70469700 1.11491300  
H 4.02817400 -0.69870100 0.45663500  
O -0.00352200 0.00846900 2.30805000

<sup>5</sup>TS6

BP86/BS1 SCF energy in solution: -2378.344415 a.u.

BP86/BS2 SCF energy in solution: -2379.77067 a.u.

BP86/BS2 Free energy in solution: -2379.3785 a.u.

1 5

Co 0.34136200 -0.00138600 -0.27704500  
N -0.60968300 -0.83769900 1.49911700  
N 1.28933000 -1.94956400 -0.35349000  
C -2.02960900 -1.05886100 1.13590800  
C 1.32985000 -2.54224600 -1.70587500  
C 2.64284000 -1.61176400 0.16103800  
C -0.47323600 0.17109700 2.58211900  
C 0.08194600 -2.11182700 1.82855900  
C 0.52716100 -2.83897100 0.56263100  
N 0.28508100 1.82518600 0.87566100  
N 2.36504700 0.70622900 -0.81540600  
C -0.19799200 2.98205600 0.09327700  
C 2.35929600 1.14813300 -2.23294800  
C 3.28201800 -0.46554700 -0.63107700  
C -0.61827900 1.58698300 2.03346000  
C 1.70692600 1.95222100 1.28628300  
C 2.65523100 1.86819500 0.08729500  
H 0.95544100 -1.86987200 2.46538100  
H -0.57628600 -2.78124400 2.42817500  
H -0.35597700 -3.20054600 -0.00240000  
H 1.12784100 -3.73734200 0.83682300  
H -2.48777100 -0.11558600 0.78757600



H -2.09911900 -1.78618000 0.30654200  
H -2.60080100 -1.44904600 2.00958000  
H -1.22929000 0.00269700 3.38320000  
H 0.52329600 0.03421200 3.04743200  
H -1.65341200 1.75607800 1.67651000  
H -0.42797400 2.32685900 2.84535200  
H -0.19333000 3.91182600 0.70850700  
H 0.43695600 3.14674500 -0.79698900  
H -1.22952900 2.76389800 -0.24553800  
H 1.87947800 2.91438500 1.82472700  
H 1.93011400 1.13419500 2.00065100  
H 3.70133000 1.82052500 0.45834600  
H 2.57744200 2.79352400 -0.51649000  
H 1.60933600 1.94951300 -2.37077600  
H 3.35939500 1.53133900 -2.54038400  
H 2.08647000 0.30233100 -2.89141800  
H 4.21448700 -0.15233800 -0.11533100  
H 3.58317800 -0.82353700 -1.63497800  
H 2.53857500 -1.32046500 1.22570100  
H 3.31462400 -2.50218700 0.12775000  
H 0.29485700 -2.71093500 -2.05914800  
H 1.83193600 -1.86495500 -2.42038400  
H 1.87340400 -3.51547200 -1.69990200  
O -0.81438400 0.18253900 -1.60867800  
O -5.05548100 0.12604900 -1.40571000  
H -1.73327000 0.66960800 -1.42567600  
O -4.95030700 -0.90474700 -0.42472500  
H -5.89027300 -1.18249200 -0.33981700  
O -2.98872600 1.39731800 -1.09209200  
H -3.06184600 2.12113500 -1.74669800  
H -3.95020500 0.77557500 -1.24167500

<sup>4</sup>IM10

BP86/BS1 SCF energy in solution: -2151.138413 a.u.

BP86/BS2 SCF energy in solution: -2152.263685 a.u.

BP86/BS2 Free energy in solution: -2151.899163 a.u.

1 4

Co -0.00183500 -0.01525400 0.64155100  
N -1.10371600 -1.69886400 -0.31630000  
N -1.65803700 1.15362300 -0.19701000  
C -1.67412500 -2.54285500 0.75214200  
C -2.18818600 2.17137900 0.72837000  
C -1.04531000 1.75482400 -1.40390600

C -0.10850700 -2.45031200 -1.12052400  
C -2.16890400 -1.09789900 -1.15479800  
C -2.72254600 0.17386900 -0.51884600  
N 1.73199600 -1.13857900 -0.06359300  
N 1.17694600 1.71121600 -0.20798300  
C 2.78593900 -1.22881200 0.96528300  
C 1.61674600 2.50492200 0.96400000  
C 0.25393400 2.50091000 -1.07588100  
C 1.25086800 -2.49513400 -0.42633900  
C 2.16811100 -0.35894700 -1.24924200  
C 2.35039900 1.12560900 -0.91973300  
H -1.73354500 -0.87008400 -2.14802100  
H -3.00398200 -1.81575800 -1.33183400  
H -3.23519900 -0.06948100 0.43483700  
H -3.49314100 0.62103300 -1.19272200  
H -0.88337300 -2.85455700 1.46024400  
H -2.43039400 -1.97434800 1.32690900  
H -2.16437500 -3.45133400 0.32738600  
H -0.45197900 -3.49204100 -1.32429300  
H -0.01881600 -1.94797900 -2.10444500  
H 1.17862000 -3.07956200 0.51357200  
H 1.98716700 -3.02301100 -1.07839500  
H 3.67966200 -1.78272500 0.59072300  
H 3.10941100 -0.21986900 1.28344800  
H 2.38652100 -1.75715400 1.85316200  
H 3.12443700 -0.76365300 -1.66270100  
H 1.39750300 -0.47520500 -2.03706800  
H 2.56147200 1.67920300 -1.86104200  
H 3.24330500 1.25668000 -0.27614300  
H 2.22307600 1.87053800 1.63961800  
H 2.22773300 3.39036800 0.66716100  
H 0.73504900 2.85888000 1.53204900  
H 0.75354300 2.77932900 -2.02927000  
H 0.02192000 3.45404100 -0.55937900  
H -0.82879800 0.93692000 -2.11895900  
H -1.75251000 2.45628500 -1.91155800  
H -2.49005800 1.68170700 1.67390300  
H -1.41288800 2.92184600 0.97008700  
H -3.06686000 2.70490600 0.29367500  
O -0.53356800 -0.11011000 2.42841900  
H -1.48624900 -0.27933700 2.57085800

<sup>5</sup>IM11

BP86/BS1 SCF energy in solution: -2301.97829 a.u.

BP86/BS2 SCF energy in solution: -2303.293707 a.u.

BP86/BS2 Free energy in solution: -2302.92056 a.u.

1 5

Co -0.00414700 0.00514900 -0.32177800  
N -0.64129500 -1.40502300 1.23647400  
N 1.81186800 -1.29925800 -0.28791100  
C -1.71394600 -2.22355600 0.62736900  
C 2.39241500 -1.66372500 -1.59419400  
C 2.73162900 -0.43879000 0.49409900  
C -1.15884700 -0.59383400 2.36996400  
C 0.51875500 -2.23975500 1.63527900  
C 1.42895000 -2.53086200 0.44576100  
N -1.01984100 1.44688700 0.93811100  
N 1.54090800 1.58161200 -0.40117500  
C -1.86327500 2.39584700 0.18100900  
C 1.49109700 2.13289800 -1.77856900  
C 2.86787500 0.94932800 -0.13143500  
C -1.86558100 0.66675400 1.87890500  
C 0.12032200 2.11953700 1.61120900  
C 1.14828400 2.62750400 0.59701400  
H 1.07486500 -1.69568500 2.42390400  
H 0.18681400 -3.20261300 2.08836200  
H 0.91154600 -3.19343800 -0.27822700  
H 2.33062700 -3.08638000 0.79912400  
H -2.50176800 -1.56820800 0.20523000  
H -1.30390200 -2.82367600 -0.20694400  
H -2.16093700 -2.91396400 1.38048800  
H -1.85814200 -1.18704700 3.00398600  
H -0.29731100 -0.32346200 3.01215100  
H -2.79033600 0.39965400 1.32902300  
H -2.17126000 1.28830600 2.75357100  
H -2.33958800 3.14369200 0.85846400  
H -1.26514500 2.94123500 -0.57348300  
H -2.65205100 1.82497000 -0.34749600  
H -0.23492100 2.97242400 2.23841800  
H 0.59758100 1.38724400 2.29281900  
H 2.04001600 3.00377200 1.14272500  
H 0.73262500 3.49177400 0.04231200  
H 0.47796100 2.52854000 -1.98681800  
H 2.22882200 2.95655500 -1.92059900  
H 1.70744500 1.33180600 -2.51065800  
H 3.47896300 1.59095700 0.53881800  
H 3.42101600 0.88119800 -1.08908300

H 2.32625500 -0.34066100 1.52036000  
H 3.74192500 -0.90810100 0.58107700  
H 1.67985000 -2.29683100 -2.15844000  
H 2.60842500 -0.76287400 -2.19833100  
H 3.34064900 -2.23857700 -1.46951500  
O -0.68839700 -0.71051700 -1.99939900  
H -0.42014900 -1.62361600 -2.22681500  
H -1.94306100 -0.59700600 -2.26473400  
O -3.65260600 -0.16968200 -1.33923900  
O -3.06679500 -0.44437400 -2.49994100

<sup>5</sup>TS7

BP86/BS1 SCF energy in solution: -2301.963235 a.u.

BP86/BS2 SCF energy in solution: -2303.277748 a.u.

BP86/BS2 Free energy in solution: -2302.90033 a.u.

1 5

Co 0.03970400 -0.00580100 0.38878800  
N -1.33709700 -1.69962100 -0.17217200  
N -1.85522100 1.12819300 0.22352400  
C -1.43423700 -2.62837000 0.97397700  
C -2.05014900 2.16075400 1.26079700  
C -1.74191300 1.72209500 -1.12946200  
C -0.72491100 -2.37804800 -1.34276700  
C -2.66590700 -1.12222500 -0.50305500  
C -2.94728400 0.12894700 0.32020200  
N 1.36847500 -1.06511700 -1.01631200  
N 0.75413000 1.75581200 -0.81716200  
C 2.77872800 -1.19465100 -0.58308300  
C 1.57721100 2.57063200 0.11119100  
C -0.44424300 2.51797500 -1.28404500  
C 0.79298500 -2.41799800 -1.23021300  
C 1.27005200 -0.22829100 -2.24035300  
C 1.59597300 1.22793300 -1.92851000  
H -2.67596500 -0.88143100 -1.58392500  
H -3.48205800 -1.86315700 -0.34003200  
H -3.05555700 -0.13238100 1.39316800  
H -3.92160000 0.57041900 -0.00019100  
H -0.42696700 -2.90115700 1.34444200  
H -1.99754200 -2.15867000 1.80353600  
H -1.97341300 -3.56156600 0.68682000  
H -1.11513100 -3.41655200 -1.45468100  
H -1.02919400 -1.82616600 -2.25382500  
H 1.10002400 -3.04343100 -0.36770200

H 1.22272800 -2.89414400 -2.14340100  
H 3.41827800 -1.55357800 -1.42376300  
H 3.17187300 -0.23324100 -0.20309300  
H 2.83210900 -1.90770300 0.25819900  
H 1.96009100 -0.60974600 -3.03100400  
H 0.23864000 -0.30446600 -2.63741400  
H 1.47095900 1.84253700 -2.84679400  
H 2.65841600 1.31911300 -1.62860500  
H 2.37897900 1.94221500 0.54787300  
H 2.03598000 3.44775700 -0.40259200  
H 0.94635200 2.94206500 0.94213500  
H -0.32948400 2.81170000 -2.34948500  
H -0.50163300 3.46135800 -0.70518700  
H -1.75790200 0.89905100 -1.87021800  
H -2.61345900 2.38444700 -1.35298400  
H -2.02879200 1.68341800 2.25803200  
H -1.24074700 2.91336400 1.22599100  
H -3.02360100 2.68877200 1.12541800  
O -0.26631700 -0.13794100 2.45224300  
H -0.84438700 -0.83064800 2.83330300  
H 0.74313100 -0.36967300 2.68938500  
O 2.96361700 0.35071900 2.39894300  
O 2.07995500 -0.61893400 2.26332800

<sup>2</sup>TS3a

BP86/BS1 SCF energy in solution: -2378.20267 a.u.  
BP86/BS2 SCF energy in solution: -2379.615531 a.u.  
BP86/BS2 Free energy in solution: -2379.218479 a.u.

2 2

Co 0.51443600 0.00843800 -0.04644900  
N -0.45210500 1.44369400 -1.04250800  
N 1.91172900 1.34543200 0.47527200  
C -1.56020000 2.11464800 -0.32112100  
C 2.18850400 1.56989500 1.91579800  
C 3.05891500 0.68836600 -0.22685400  
C -0.93963300 0.72809400 -2.26990700  
C 0.65008200 2.40820700 -1.38057300  
C 1.50673600 2.65134200 -0.14992400  
N -0.60840700 -1.35679300 -0.97049400  
N 1.86600500 -1.45737600 0.37563100  
C -1.37913300 -2.34548200 -0.18035000  
C 1.78335000 -2.12902800 1.70251400  
C 3.20991900 -0.75829300 0.24805600

C -1.54807100 -0.60434300 -1.86958800  
C 0.53765500 -1.98152900 -1.71005000  
C 1.59838400 -2.47510600 -0.72331800  
H 1.24687200 1.96139500 -2.20037400  
H 0.22646700 3.36237400 -1.76125100  
H 0.93581100 3.20974800 0.61660700  
H 2.40626800 3.25380700 -0.40066400  
H -2.34151400 1.38113800 -0.04633900  
H -1.17526300 2.58887700 0.59943400  
H -2.01123900 2.89128200 -0.97518100  
H -1.68037100 1.35176100 -2.81507500  
H -0.07033500 0.58677600 -2.94241900  
H -2.48606400 -0.44645500 -1.29979900  
H -1.79733000 -1.21463300 -2.76446000  
H -1.88581300 -3.05682800 -0.86762700  
H -0.72497800 -2.91779300 0.49863400  
H -2.14139800 -1.81859900 0.41795600  
H 0.18230400 -2.81952100 -2.35088200  
H 0.95984400 -1.20806700 -2.38480700  
H 2.53541400 -2.69695500 -1.27095200  
H 1.27464300 -3.41675700 -0.24139400  
H 0.78911700 -2.59505100 1.83668800  
H 2.55780500 -2.92218900 1.77818000  
H 1.95831900 -1.39537500 2.51310500  
H 3.86075800 -1.31402600 -0.45519400  
H 3.70104600 -0.79251800 1.23819400  
H 2.85154600 0.72156700 -1.31643500  
H 4.00173700 1.25345100 -0.05205900  
H 1.26243300 1.91159300 2.41126900  
H 2.53556400 0.64533600 2.40975000  
H 2.97904500 2.34344100 2.02473800  
O -0.45062400 0.13636400 1.58069400  
O -4.68311400 -0.39373200 1.01144000  
H -1.73700300 0.15350000 1.92258000  
O -4.50620400 0.18009100 -0.15004700  
O -2.75651700 0.21517900 2.36485300  
H -2.87450400 1.14921000 2.64355800  
H -3.71070900 -0.09507000 1.69691400  
H -0.00618500 -0.41178600 2.26250600

<sup>4</sup>TS3a

BP86/BS1 SCF energy in solution: -2378.203694 a.u.

BP86/BS2 SCF energy in solution: -2379.617951 a.u.

BP86/BS2 Free energy in solution: -2379.220509 a.u.

2 4

Co 0.45178800 0.00832400 0.05714900  
N -0.28710200 1.60865600 -0.97795000  
N 1.84650700 1.27028000 0.80005300  
C -1.44545200 2.21985600 -0.27498200  
C 2.03044400 1.33697400 2.27033800  
C 3.04664800 0.68969200 0.10641700  
C -0.69777800 1.05894400 -2.30837400  
C 0.86232000 2.56210000 -1.07657100  
C 1.54748300 2.64936000 0.27555500  
N -0.50694900 -1.18347100 -1.24981000  
N 1.84461400 -1.49978300 0.23958800  
C -1.34245100 -2.30669600 -0.75693700  
C 1.59513300 -2.35424000 1.43733500  
C 3.17616400 -0.79845400 0.39793800  
C -1.36570600 -0.28859500 -2.09959100  
C 0.70395200 -1.67984100 -1.99199000  
C 1.70342300 -2.31820300 -1.02847800  
H 1.55137200 2.18518000 -1.85763400  
H 0.50935000 3.56471800 -1.40274900  
H 0.89415100 3.14912200 1.01626000  
H 2.48625700 3.24067300 0.21038300  
H -2.26706300 1.48647600 -0.17354700  
H -1.15179600 2.55218500 0.73640200  
H -1.80450000 3.09334000 -0.86097000  
H -1.38776700 1.76090700 -2.82447600  
H 0.21066300 0.96961500 -2.93521000  
H -2.32743500 -0.17224800 -1.55966500  
H -1.58290500 -0.78400000 -3.07098200  
H -1.78981400 -2.83945800 -1.62385100  
H -0.74158000 -3.02845600 -0.17761000  
H -2.14785800 -1.91863000 -0.10940600  
H 0.39647500 -2.40634900 -2.77668300  
H 1.16845900 -0.81421200 -2.50401000  
H 2.68621500 -2.41428500 -1.53013200  
H 1.38532200 -3.33847600 -0.74107700  
H 0.60636400 -2.84055800 1.36163600  
H 2.38008800 -3.13819700 1.50815600  
H 1.61553800 -1.73435700 2.35198000  
H 3.93207800 -1.24999900 -0.27529500  
H 3.52469200 -0.96624300 1.43431800  
H 2.91564800 0.85648200 -0.98133200  
H 3.96528400 1.23371000 0.42057300

H 1.12111600 1.76176200 2.73672200  
H 2.22819000 0.33689100 2.69457200  
H 2.88781700 2.00261700 2.51044900  
O -0.73668400 -0.13661800 1.54887600  
O -4.79807000 0.16182100 1.14738000  
H -1.96137900 -0.70683300 1.79381400  
O -4.44637500 0.58157900 -0.04109800  
O -2.93101700 -1.18166700 1.95445600  
H -3.01336200 -1.37145000 2.91341500  
H -3.89177100 -0.47347700 1.57428600  
H -0.46353400 0.38272800 2.33458900

[Co(12-TMC)]<sup>0+</sup>

BP86/BS1 SCF energy in solution: -2075.348926 a.u.

BP86/BS2 SCF energy in solution: -2076.39396 a.u.

BP86/BS2 Free energy in solution: -2076.046977 a.u.

O 2

Co 0.03750200 0.00016500 0.44897800  
N 2.15007800 0.00069900 -0.08903600  
N -0.00238900 -1.99433500 0.10299700  
C 3.06787500 0.00209200 1.04901500  
C -0.55155000 -2.95629700 1.08058400  
C -0.84905500 -1.93198900 -1.12145000  
C 2.19986900 1.24333600 -0.87558200  
C 2.20218900 -1.24302700 -0.87367600  
C 1.40452600 -2.37242200 -0.20666000  
N -0.00386500 1.99427900 0.10280900  
N -2.14768200 -0.00082500 -0.11133800  
C -0.55181400 2.95505000 1.08234200  
C -3.01846800 -0.00290000 1.06981300  
C -2.22105000 -1.26228800 -0.87825800  
C 1.40248100 2.37303800 -0.20884400  
C -0.85247400 1.93304500 -1.12031500  
C -2.22355200 1.26225200 -0.87538600  
H 1.79361700 -1.03060800 -1.88290600  
H 3.25124300 -1.60760700 -1.03089600  
H 1.88131300 -2.64494400 0.75712800  
H 1.45067700 -3.28555400 -0.85540000  
H 2.88172400 0.89221500 1.68394900  
H 2.88161000 -0.88656700 1.68604900  
H 4.14610500 0.00163000 0.73297500  
H 3.24835700 1.60849000 -1.03541800  
H 1.78932400 1.02897800 -1.88361800  
H 1.88028800 2.64674800 0.75408400



H 1.44736100 3.28556200 -0.85849100  
H -0.52490500 4.00996700 0.69992000  
H -1.60048800 2.70451100 1.32841400  
H 0.04022900 2.88856800 2.01743800  
H -1.02984900 2.95958600 -1.54107600  
H -0.29355600 1.36398900 -1.89101100  
H -2.70851100 1.11071500 -1.86838800  
H -2.88026700 1.96399100 -0.31962700  
H -2.80040100 0.88519800 1.69657100  
H -4.11231100 -0.00350400 0.81922800  
H -2.79884400 -0.89194600 1.69464900  
H -2.70329200 -1.10869900 -1.87225300  
H -2.87909200 -1.96560700 -0.32597400  
H -0.28909600 -1.36163900 -1.89042500  
H -1.02508400 -2.95811200 -1.54387100  
H 0.03811500 -2.88964200 2.01719700  
H -1.60117600 -2.70731200 1.32420600  
H -0.52248700 -4.01093500 0.69762500

[Co(12-TMC)]<sup>1+</sup>

BP86/BS1 SCF energy in solution: -2075.327858 a.u.

BP86/BS2 SCF energy in solution: -2076.361546 a.u.

BP86/BS2 Free energy in solution: -2076.004269 a.u.

1 1

Co 0.00155400 -0.02247600 0.25242500  
N 0.13950400 -1.95845800 -0.03354300  
N -1.95656500 -0.14854400 0.06838500  
C 0.21392800 -2.78997400 1.19297700  
C -2.82659600 0.31077000 1.17937900  
C -2.09418500 0.73514000 -1.12526000  
C 1.37906800 -2.09120700 -0.85908000  
C -1.07859000 -2.27978200 -0.83801200  
C -2.28312800 -1.58008500 -0.22587200  
N 1.96023600 0.12845100 0.06812700  
N -0.14038500 1.93776900 -0.05646700  
C 2.75604800 0.68829100 1.18885600  
C -0.22338600 2.79197000 1.16560800  
C -1.41313100 2.08878400 -0.86224700  
C 2.48246800 -1.23815200 -0.25041100  
C 1.97442700 1.04248500 -1.11154100  
C 1.11669600 2.28401700 -0.82369800  
H 0.31100400 -3.87344500 0.93985000  
H 1.08359600 -2.48489500 1.80464700  
H -0.69725000 -2.64467000 1.80263600

H -3.90352900 0.15782700 0.93157400  
H -2.57822000 -0.25917600 2.09551600  
H -2.67300300 1.38456400 1.38468000  
H -3.17330400 0.90150500 -1.37663500  
H -1.62821000 0.22083700 -1.98788600  
H 1.13997700 -1.74728300 -1.88488100  
H 1.70599200 -3.15612100 -0.93452400  
H -1.25285900 -3.38107100 -0.89095600  
H -2.55026700 -2.05572800 0.73862400  
H 3.84395200 0.69178300 0.94139600  
H 2.45324700 1.72702100 1.41057200  
H 2.59147400 0.07464200 2.09561000  
H -0.29481600 3.87384200 0.90253700  
H -1.11034600 2.51400600 1.76449700  
H 0.67146300 2.63768300 1.79605100  
H -2.09830700 2.75984900 -0.30452300  
H -1.20395900 2.58975100 -1.82954400  
H 3.36856300 -1.18683300 -0.92391700  
H 2.82756900 -1.68487400 0.70307200  
H 3.02002500 1.35957400 -1.35967800  
H 1.69534700 3.01424700 -0.22232600  
H 0.86756000 2.79225700 -1.77811200  
H 1.58151100 0.48507900 -1.98368000  
H -0.90398000 -1.92599600 -1.87317400  
H -3.17643000 -1.66559700 -0.88662100

[Co(12-TMC)]<sup>3+</sup>

BP86/BS1 SCF energy in solution: -2075.040172 a.u.

BP86/BS2 SCF energy in solution: -2076.062635 a.u.

BP86/BS2 Free energy in solution: -2075.701327 a.u.

3 3

Co -0.01740300 -0.00207900 0.48332500  
N 0.00804700 -1.81482500 -0.41469900  
N 0.03163800 1.81070400 -0.41257900  
N -2.02707300 0.01217000 0.32189600  
N 2.00654200 -0.00947000 0.33375100  
C 2.41781500 1.19186800 -0.49922900  
H 2.81394700 1.95540200 0.19555700  
H 3.24452800 0.90894900 -1.18049400  
C -1.26072200 1.85613400 -1.18317600  
H -1.13311900 1.23651700 -2.09114800  
H -1.45847600 2.89936000 -1.51074100  
C -0.09421900 -2.89852300 0.59556500  
H -0.98097000 -2.75384200 1.23777300

H 0.81193500 -2.91333800 1.22633900  
H -0.18524800 -3.87119700 0.06564100  
C 1.30496900 -1.86242800 -1.16759700  
H 1.19455100 -1.23819000 -2.07476700  
H 1.51362900 -2.90488300 -1.49057700  
C 1.23894800 1.72752600 -1.29480400  
H 1.46615900 2.73174700 -1.71499400  
H 0.98250300 1.05756600 -2.13744400  
C -1.19753800 -1.71512300 -1.30274200  
H -1.41488900 -2.71317500 -1.74299600  
H -0.93566100 -1.03407400 -2.13543000  
C -2.39251400 1.33848700 -0.31179200  
H -2.61460400 2.04244500 0.51169700  
H -3.32163700 1.22316600 -0.90649300  
C 0.11176300 2.88966700 0.60463100  
H 0.09504500 3.87181000 0.08502300  
H 1.04549600 2.80710700 1.18747000  
H -0.74937000 2.83017500 1.29452800  
C 2.40528600 -1.33966500 -0.26333200  
H 2.59047800 -2.03282700 0.57853800  
H 3.35925200 -1.23080000 -0.81814600  
C -2.39460300 -1.20203300 -0.51426100  
H -3.22273900 -0.94311600 -1.20370900  
H -2.77459000 -1.97392100 0.18014500  
C 2.53946600 0.11091000 1.71761600  
H 2.17444100 -0.73622400 2.32946900  
H 2.20441500 1.06899700 2.15946000  
H 3.65120300 0.09072000 1.69883600  
C -2.62567600 -0.09041500 1.67854700  
H -2.30266700 0.77089000 2.29273500  
H -2.30034400 -1.03526000 2.15481400  
H -3.73532100 -0.08636500 1.60398600

[Co(12-TMC)]O<sub>2</sub><sup>0+</sup>

BP86/BS1 SCF energy in solution: -2225.720838 a.u.

BP86/BS2 SCF energy in solution: -2226.945059 a.u.

BP86/BS2 Free energy in solution: -2226.592505 a.u.

O 2

Co -0.00002200 -0.00007200 0.55482200  
O 0.01876700 -0.72180600 2.31909900  
N 0.01821900 1.68499500 -0.67628800  
O -0.01902700 0.72192500 2.31891000  
N -0.01817200 -1.68501700 -0.67626700  
N 2.26372700 -0.01121900 0.08244300

N -2.26369300 0.01127800 0.08236900  
C -2.47248600 -1.19836300 -0.73276400  
H -2.76201100 -2.01769500 -0.04358400  
H -3.32486600 -1.07956600 -1.44896300  
C 1.22919600 -1.69772600 -1.47842400  
H 1.08950800 -1.00738700 -2.33174200  
H 1.42291900 -2.70930600 -1.91523400  
C 0.06679000 2.87041100 0.20810200  
H 0.96047600 2.82506300 0.85626900  
H -0.81242800 2.87664500 0.87740900  
H 0.08748500 3.81875900 -0.38348600  
C -1.22910400 1.69774800 -1.47848900  
H -1.08940100 1.00742800 -2.33182300  
H -1.42278600 2.70934500 -1.91528900  
C -1.22940900 -1.63065100 -1.52978100  
H -1.43854500 -2.62184700 -2.00560900  
H -1.02647300 -0.92219700 -2.35565400  
C 1.22948700 1.63070000 -1.52975700  
H 1.43862100 2.62192200 -2.00552600  
H 1.02659200 0.92228500 -2.35567500  
C 2.44647300 -1.28157500 -0.63952300  
H 2.64890300 -2.06623700 0.11807600  
H 3.34410000 -1.25558200 -1.30948700  
C -0.06680100 -2.87051300 0.20801900  
H -0.08769600 -3.81880600 -0.38365700  
H -0.96039000 -2.82509400 0.85631700  
H 0.81251700 -2.87695600 0.87719000  
C -2.44643400 1.28160900 -0.63965100  
H -2.64891800 2.06629000 0.11791100  
H -3.34401500 1.25557200 -1.30966700  
C 2.47255800 1.19838700 -0.73272800  
H 3.32492400 1.07953500 -1.44893700  
H 2.76212800 2.01773200 -0.04358100  
C -3.01736500 -0.01443300 1.33826300  
H -2.65909800 0.81637400 1.97935700  
H -2.78076600 -0.94923200 1.88321400  
H -4.12640300 0.06055900 1.19970000  
C 3.01735000 0.01450600 1.33836700  
H 2.65900700 -0.81624400 1.97949200  
H 2.78082100 0.94935800 1.88325600  
H 4.12639000 -0.06057600 1.19985300

[Co(12-TMC)]O<sub>2</sub><sup>2+</sup>

BP86/BS1 SCF energy in solution: -2225.485997 a.u.

BP86/BS2 SCF energy in solution: -2226.697872 a.u.

BP86/BS2 Free energy in solution: -2226.328876 a.u.

2 2

Co -0.00007900 -0.00042300 0.42466000  
O -0.01155700 -0.66284800 2.21945900  
N 0.06858200 1.66941100 -0.69174600  
O 0.01046600 0.64774300 2.23225400  
N -0.06838500 -1.66729400 -0.69485400  
N 2.04657400 -0.06444100 0.16986900  
N -2.04641700 0.06578000 0.16965100  
C -2.42030100 -1.03719800 -0.80733100  
H -2.82918800 -1.87626500 -0.21513500  
H -3.23445500 -0.68163200 -1.47142800  
C 1.24547100 -1.81826000 -1.39226000  
H 1.24106700 -1.17742400 -2.29334600  
H 1.38216000 -2.86748100 -1.73075800  
C 0.29368700 2.84271700 0.21076200  
H 1.20574300 2.71086900 0.81789800  
H -0.56470800 2.97803400 0.89175200  
H 0.40601300 3.75491000 -0.41296000  
C -1.24501500 1.82266100 -1.38903000  
H -1.24078300 1.18394500 -2.29162500  
H -1.38142500 2.87270600 -1.72514400  
C -1.22178600 -1.49635300 -1.62220100  
H -1.45117100 -2.45467100 -2.13833000  
H -0.92598000 -0.76327400 -2.39497100  
C 1.22211200 1.50116100 -1.61922200  
H 1.45159100 2.46065800 -2.13316500  
H 0.92665000 0.76968100 -2.39368800  
C 2.33457000 -1.42210100 -0.41533700  
H 2.38907100 -2.13825200 0.42718600  
H 3.33178500 -1.41311300 -0.90312400  
C -0.29394700 -2.84377800 0.20337300  
H -0.40878900 -3.75311000 -0.42400300  
H -1.20473400 -2.71279300 0.81259000  
H 0.56530900 -2.98360200 0.88234800  
C -2.33425000 1.42456700 -0.41310100  
H -2.38875100 2.13891400 0.43090600  
H -3.33151100 1.41642700 -0.90082000  
C 2.42053600 1.04024400 -0.80524000  
H 3.23458100 0.68563100 -1.46997500  
H 2.82966000 1.87813100 -0.21156500  
C -2.83747800 -0.09932200 1.41780400  
H -2.58326900 0.70712700 2.13010900

H -2.61609200 -1.08250400 1.87389900  
H -3.92240800 -0.04431800 1.18409300  
C 2.83743700 0.09920000 1.41834200  
H 2.58565700 -0.70989200 2.12846100  
H 2.61368400 1.08053700 1.87722700  
H 3.92246000 0.04761300 1.18424300

[Co(12-TMC)]O<sub>2</sub><sup>3+</sup>

BP86/BS1 SCF energy in solution: -2225.245204 a.u.

BP86/BS2 SCF energy in solution: -2226.459682 a.u.

BP86/BS2 Free energy in solution: -2226.09555 a.u.

3 3

Co -0.00001000 0.00000200 0.30683500  
O 0.00832200 0.64157900 2.13399500  
N -0.06898200 -1.80957000 -0.62592600  
O -0.00852700 -0.64157700 2.13398000  
N 0.06904200 1.80957600 -0.62591600  
N -2.06588700 0.06621400 0.13570200  
N 2.06586600 -0.06622400 0.13589900  
C 2.44297100 1.12377800 -0.73432500  
H 2.84308900 1.90285400 -0.06058100  
H 3.26033500 0.82688000 -1.42168300  
C -1.22900700 1.87857300 -1.37962000  
H -1.13389200 1.25885300 -2.29002100  
H -1.39549700 2.92972000 -1.70036400  
C -0.22991000 -2.93343100 0.33757900  
H -1.12567300 -2.78197600 0.96501400  
H 0.66818800 -3.02891600 0.97260500  
H -0.35597200 -3.86443800 -0.25472900  
C 1.22914000 -1.87858600 -1.37950100  
H 1.13412500 -1.25887200 -2.28991700  
H 1.39565100 -2.92973800 -1.70021700  
C 1.25759300 1.64491100 -1.52478100  
H 1.49677000 2.63106300 -1.98132400  
H 0.96261000 0.96134500 -2.34321400  
C -1.25745100 -1.64490400 -1.52490000  
H -1.49657600 -2.63105400 -1.98147400  
H -0.96239800 -0.96132400 -2.34329500  
C -2.36061000 1.41591500 -0.48629500  
H -2.51094900 2.12634400 0.34896800  
H -3.31110400 1.35883600 -1.05514500  
C 0.22987100 2.93344900 0.33759000  
H 0.35598900 3.86444600 -0.25472200  
H 1.12557200 2.78200600 0.96511400

H -0.66829000 3.02894400 0.97252400  
 C 2.36064800 -1.41593200 -0.48605500  
 H 2.51088300 -2.12635600 0.34923100  
 H 3.31120800 -1.35886500 -1.05479600  
 C -2.44290400 -1.12379300 -0.73454100  
 H -3.26022000 -0.82691600 -1.42196600  
 H -2.84305800 -1.90287800 -0.06082700  
 C 2.80528700 0.02991300 1.42421100  
 H 2.54472100 -0.82138600 2.08067300  
 H 2.58181300 0.98989200 1.92681300  
 H 3.89530600 -0.01210300 1.21005500  
 C -2.80541300 -0.02990300 1.42395500  
 H -2.54488600 0.82139900 2.08042900  
 H -2.58199100 -0.98988100 1.92658600  
 H -3.89541600 0.01212400 1.20971500

[CoTp<sup>tBu,Me</sup>]<sup>0+</sup>

BP86/BS1 SCF energy in solution: -2674.038482 a.u.

BP86/BS2 SCF energy in solution: -2675.761149 a.u.

BP86/BS2 Free energy in solution: -2675.230072 a.u.

O 3

Co 0.00071200 0.00003400 -0.85758600  
 B -0.00217900 -0.00118400 2.03513300  
 N 1.19841500 -1.17412700 0.15213500  
 N 1.06978200 -1.01045400 1.50515500  
 N 0.41875700 1.62442800 0.15248100  
 N 0.33707600 1.43179500 1.50526300  
 N -1.61628000 -0.45108200 0.14943500  
 N -1.41151800 -0.42387700 1.50256900  
 C 2.19471000 -2.05854400 -0.06930100  
 C 2.72367600 -2.47625300 1.18000000  
 C 1.98854400 -1.79139400 2.15836100  
 C 2.12011600 -1.83763900 3.65079100  
 C 2.52380500 -2.50863200 -1.48820500  
 C 1.54944700 -3.64930800 -1.88594800  
 C 3.97720900 -3.02544400 -1.55946300  
 C 2.35203000 -1.32718500 -2.47076000  
 C 0.68673000 2.92952000 -0.06867300  
 C 0.77933800 3.59706700 1.18069300  
 C 0.55106600 2.61828100 2.15868400  
 C 0.52056300 2.75559200 3.65094800  
 C 0.91573500 3.43907600 -1.48712700  
 C 2.39038500 3.16110900 -1.88300700  
 C -0.02246400 2.70241800 -2.47089700

C 0.64154600 4.95703300 -1.55815500  
C -2.88033100 -0.87094300 -0.07393200  
C -3.50758300 -1.12262400 1.17428400  
C -2.54766500 -0.83052400 2.15398800  
C -2.65465900 -0.92413300 3.64614100  
C -3.43384600 -0.92763200 -1.49321400  
C -2.32426600 -1.36703400 -2.47632300  
C -3.93454900 0.48742700 -1.88771600  
C -4.60813400 -1.92757100 -1.56693000  
H -0.00404800 -0.00178000 3.25370300  
H 0.98386700 4.65757700 1.36442500  
H 0.73287700 3.80415200 3.93642100  
H -0.46859600 2.48108500 4.07506100  
H 1.27543600 2.10810600 4.14513100  
H 0.17799500 3.01090400 -3.51853800  
H 0.13228400 1.59116200 -2.41602100  
H -1.08918700 2.90458400 -2.24284400  
H 1.33125400 5.52495400 -0.89966600  
H 0.78877900 5.33017400 -2.59350700  
H -0.39768100 5.19522900 -1.25017200  
H 3.09069900 3.67472600 -1.19243600  
H 2.60777900 2.07395400 -1.83680000  
H 2.59856400 3.51550400 -2.91572900  
H -2.47212700 0.05379000 4.13973000  
H -3.66974200 -1.26368300 3.92969100  
H -1.92366300 -1.64332600 4.07289000  
H -4.52887700 -1.47503500 1.35601000  
H -5.44564600 -1.61815600 -0.90767400  
H -5.00493400 -1.98562500 -2.60238900  
H -4.29175100 -2.94649500 -1.26143000  
H -3.10477600 1.22242100 -1.83693300  
H -4.34186500 0.49161400 -2.92193300  
H -4.73337200 0.83247000 -1.19925100  
H -1.44138900 -0.67488500 -2.41973200  
H -1.96304900 -2.39118400 -2.24944700  
H -2.69068300 -1.34739000 -3.52429200  
H 2.37920500 -0.84560700 4.07792600  
H 1.18025500 -2.16623000 4.14265000  
H 2.91949800 -2.54885800 3.93582600  
H 3.53921800 -3.18440600 1.36351900  
H 4.70059600 -2.24199600 -1.25205900  
H 4.12714600 -3.90611400 -0.90086200  
H 4.22758000 -3.33904800 -2.59484700  
H 1.75259700 -4.00422000 -2.91948400



H 1. 64770100 -4. 51368100 -1. 19720000  
H 0. 49800100 -3. 29789200 -1. 83826300  
H 3. 05751400 -0. 50226400 -2. 24125300  
H 2. 52126500 -1. 65347000 -3. 51853900  
H 1. 31089700 -0. 90881400 -2. 41723000

[CoTp<sup>tBu,Me</sup>]<sup>1+</sup>

BP86/BS1 SCF energy in solution: -2673.84486 a.u.

BP86/BS2 SCF energy in solution: -2675.59791 a.u.

BP86/BS2 Free energy in solution: -2675.068659 a.u.

1 4

Co -0. 05937900 0. 00696800 -0. 88850300  
B 0. 12095400 0. 01253400 2. 09089500  
N 1. 67280900 0. 00241900 0. 12379900  
N 1. 55244600 0. 00825300 1. 48250200  
N -0. 80278400 1. 43482200 0. 22076800  
N -0. 63656200 1. 28277500 1. 56903600  
N -0. 81139300 -1. 42096700 0. 21868200  
N -0. 63935600 -1. 25789400 1. 56771300  
C 2. 98360700 0. 03314300 -0. 19497300  
C 3. 73415900 0. 05262000 1. 00623500  
C 2. 79897100 0. 03745700 2. 05215400  
C 3. 02838200 0. 05446900 3. 53196500  
C 3. 43448500 0. 00142900 -1. 64848900  
C 3. 87315300 -1. 44065600 -2. 01546900  
C 4. 61988500 0. 97505900 -1. 85369800  
C 2. 26839700 0. 43968400 -2. 56143600  
C -1. 53040500 2. 55693400 -0. 00814400  
C -1. 83079900 3. 14707300 1. 23721200  
C -1. 25564500 2. 31369700 2. 21784000  
C -1. 28024000 2. 45615600 3. 70705300  
C -1. 84120600 3. 00866700 -1. 42754700  
C -0. 82141900 4. 10236200 -1. 84391300  
C -1. 74286800 1. 80978200 -2. 39768200  
C -3. 27632400 3. 58460900 -1. 49151000  
C -1. 45589300 -2. 59675000 -0. 00006500  
C -1. 70340100 -3. 20129600 1. 24855300  
C -1. 17643700 -2. 32816500 2. 22267000  
C -1. 16445500 -2. 47883100 3. 71123900  
C -1. 83613000 -3. 03681100 -1. 40682000  
C -0. 87033700 -2. 40847200 -2. 43650400  
C -3. 28857600 -2. 57466700 -1. 70045000  
C -1. 74913900 -4. 57718900 -1. 51703300  
H 0. 16223000 0. 01067000 3. 30327300

H -2.39973700 4.06379200 1.42600800  
H -1.82583600 3.37567000 3.98988800  
H -1.78404700 1.59584800 4.19423800  
H -0.25640200 2.52062900 4.12970600  
H -1.94957000 2.12291000 -3.44150100  
H -0.70313900 1.38018300 -2.43417600  
H -2.46295100 1.00663400 -2.13598000  
H -3.38352300 4.46818400 -0.83049800  
H -3.51552600 3.91352200 -2.52368000  
H -4.03175100 2.83315000 -1.18321500  
H -0.88210400 4.97923100 -1.16839100  
H 0.22024100 3.72087800 -1.80579100  
H -1.02568600 4.45248000 -2.87739900  
H -1.68921100 -1.64012900 4.21329500  
H -1.66899900 -3.41976000 3.99974400  
H -0.13024600 -2.50725400 4.11237500  
H -2.20154400 -4.15686000 1.44361200  
H -2.46229800 -5.07177000 -0.82706500  
H -2.00515200 -4.90519200 -2.54537800  
H -0.73013300 -4.94600600 -1.28046000  
H -3.38441900 -1.47086800 -1.62993600  
H -3.59831500 -2.88498100 -2.72032300  
H -4.00121900 -3.01899500 -0.97670200  
H -0.92369400 -1.28508100 -2.42542300  
H 0.17990600 -2.71900000 -2.25910100  
H -1.14507800 -2.69787500 -3.47138100  
H 2.57281900 0.94549300 4.01151000  
H 2.60169800 -0.84215700 4.02726700  
H 4.11393400 0.07390700 3.74363900  
H 4.82367900 0.07859100 1.11564000  
H 4.34411400 2.01517100 -1.58421900  
H 5.49008000 0.68139700 -1.23276800  
H 4.95079200 0.96661000 -2.91278600  
H 4.21000800 -1.49152800 -3.07213000  
H 4.71348400 -1.77405400 -1.37379400  
H 3.04136700 -2.16310100 -1.87964200  
H 1.93843300 1.47579500 -2.33714900  
H 2.55191900 0.39722300 -3.63307800  
H 1.39164000 -0.26186300 -2.47774800

[CoTp<sup>tBu,Me</sup>]O<sub>2</sub><sup>0+</sup>

BP86/BS1 SCF energy in solution: -2824.32695 a.u.

BP86/BS2 SCF energy in solution: -2826.237033 a.u.

BP86/BS2 Free energy in solution: -2825.697804 a.u.

O 3

Co -0.09181900 -0.00019700 -0.86808400  
B 0.06443200 0.00120200 2.13094600  
O 0.25931600 -0.68366400 -2.55643800  
O 0.25575500 0.68458800 -2.55651600  
N -0.87330400 1.42882000 0.28063900  
N -0.69563000 1.25467800 1.62508600  
N -0.86490700 -1.43302000 0.28143500  
N -0.68780800 -1.25730100 1.62576000  
N 1.73201800 0.00528100 0.21555900  
N 1.50746700 0.00543500 1.56893700  
C -1.58561800 2.57580200 0.10325100  
C -1.85645800 3.13292700 1.37704500  
C -1.27809000 2.27426700 2.31903500  
C -1.25740300 2.38274700 3.81383300  
C -1.99077000 3.14561300 -1.25489100  
C -0.73290000 3.68141400 -1.98715500  
C -2.97270400 4.32163300 -1.04598200  
C -2.70046400 2.06562400 -2.10627400  
C -1.56977200 -2.58473500 0.10467800  
C -1.83634400 -3.14323100 1.37876100  
C -1.26319100 -2.28051400 2.32022800  
C -1.24097600 -2.38857100 3.81504000  
C -1.97167000 -3.15783600 -1.25310100  
C -2.68831200 -2.08295600 -2.10509100  
C -0.71061400 -3.68611600 -1.98528200  
C -2.94603600 -4.33999100 -1.04326600  
C 3.08298000 0.00893000 0.03427500  
C 3.71166300 0.01139100 1.30420100  
C 2.68709900 0.00911800 2.25519400  
C 2.79169100 0.01021700 3.75105100  
C 3.79770200 0.00991600 -1.31882600  
C 3.42220100 1.28044000 -2.12080100  
C 3.42771400 -1.26290300 -2.11969900  
C 5.32690800 0.01332400 -1.09063900  
H 0.09503700 0.00162500 3.34601600  
H -2.38299700 -4.06525300 1.59766000  
H -1.77580600 -3.30489900 4.13075600  
H -0.20613600 -2.44423400 4.21259800  
H -1.73241800 -1.52122900 4.30314600  
H -0.98694700 -4.09617000 -2.97993000  
H 0.03688400 -2.88634200 -2.14237600  
H -0.22974900 -4.49764400 -1.40014300  
H -3.86384600 -4.02521200 -0.50422800

H -3.25536500 -4.74832000 -2.02756800  
 H -2.47571200 -5.16829400 -0.47386100  
 H -3.58843400 -1.69618500 -1.58384400  
 H -2.01571100 -1.23397000 -2.33171300  
 H -3.00982400 -2.51640000 -3.07545800  
 H 2.31506500 -0.88347000 4.20523400  
 H 3.85818100 0.01317900 4.04808300  
 H 2.31036500 0.90188200 4.20425100  
 H 4.78489300 0.01439100 1.51562500  
 H 5.66515000 -0.88529900 -0.53373000  
 H 5.84708600 0.01394200 -2.07076900  
 H 5.66133400 0.91393800 -0.53464100  
 H 2.34441500 -1.29920900 -2.34357000  
 H 3.97670200 -1.27580000 -3.08547000  
 H 3.70434000 -2.17880800 -1.55635700  
 H 2.33873000 1.31192400 -2.34457500  
 H 3.69502300 2.19802200 -1.55832900  
 H 3.97099800 1.29480100 -3.08666200  
 H -1.74341700 1.51227100 4.30179700  
 H -0.22317600 2.44521500 4.21197800  
 H -1.79840700 3.29559300 4.12911000  
 H -2.40936400 4.05136000 1.59536000  
 H -3.88865600 4.00107500 -0.50719000  
 H -2.50800000 5.15313800 -0.47665800  
 H -3.28424500 4.72755100 -2.03057500  
 H -1.01153600 4.08847600 -2.98238200  
 H -0.25771900 4.49680100 -1.40273000  
 H 0.02014800 2.88660600 -2.14307400  
 H -3.59861400 1.67408300 -1.58519000  
 H -3.02386200 2.49608400 -3.07734600  
 H -2.02268200 1.22039100 -2.33148300

[CoTp<sup>tBu,Me</sup>]O<sub>2</sub><sup>1+</sup>

BP86/BS1 SCF energy in solution: -2824.08112 a.u.

BP86/BS2 SCF energy in solution: -2826.01936 a.u.

BP86/BS2 Free energy in solution: -2825.482805 a.u.

1 4

Co 0.00017200 0.02575700 -0.77109000  
 B 0.00016300 -0.24478500 2.16493400  
 O 0.00036300 -0.74089300 -2.41554700  
 O -0.00041400 0.53827800 -2.73172900  
 N -0.00007400 1.56710500 0.43158700  
 N 0.00019200 1.24811100 1.76303200

N -1.48214700 -0.85092700 0.20109200  
N -1.26936100 -0.90324800 1.55583600  
N 1.48241000 -0.85059100 0.20103700  
N 1.26968700 -0.90323300 1.55577900  
C -0.00060500 2.93482700 0.31977200  
C -0.00060400 3.46756800 1.62623900  
C -0.00007700 2.38312200 2.51702800  
C 0.00011800 2.38860900 4.01322700  
C -0.00112900 3.71898500 -0.98942900  
C 1.27943700 3.39310100 -1.79947500  
C -0.00154400 5.23469400 -0.68130500  
C -1.28186900 3.39221400 -1.79886000  
C -2.69813300 -1.44416600 -0.06387700  
C -3.22746100 -1.89176600 1.15954700  
C -2.30604600 -1.54145100 2.16555300  
C -2.38486200 -1.79445100 3.63606600  
C -3.35197400 -1.56846900 -1.43743300  
C -3.37145800 -0.19490300 -2.15181300  
C -2.60558000 -2.63053200 -2.28812500  
C -4.81588100 -2.03845400 -1.25908200  
C 2.69870600 -1.44319800 -0.06407600  
C 3.22819800 -1.89083800 1.15924100  
C 2.30663500 -1.54110600 2.16534400  
C 2.38545100 -1.79453600 3.63577800  
C 3.35264900 -1.56681000 -1.43763400  
C 3.37125700 -0.19304100 -2.15165200  
C 2.60687400 -2.62916500 -2.28850200  
C 4.81686100 -2.03588200 -1.25943200  
H 0.00017900 -0.36755700 3.36989200  
H -4.17893500 -2.40826800 1.31558300  
H -3.33207800 -2.31126800 3.87796100  
H -1.54764900 -2.43210200 3.98848600  
H -2.34664400 -0.85114700 4.21882000  
H -3.12175200 -2.75712500 -3.26222500  
H -1.55928800 -2.34098200 -2.50108100  
H -2.59731400 -3.61441700 -1.77590400  
H -5.40322500 -1.33632300 -0.63247000  
H -5.30706600 -2.09475200 -2.25117700  
H -4.87560700 -3.04904900 -0.80613400  
H -3.93202300 0.55625800 -1.55848400  
H -2.35682400 0.20342700 -2.34031500  
H -3.87005000 -0.29059200 -3.13791500  
H 1.54948500 -2.43423000 3.98750700  
H 3.33366800 -2.30943800 3.87783800

H 2.34487100 -0.85161500 4.21895900  
H 4.17988100 -2.40698200 1.31519400  
H 4.87727200 -3.04665800 -0.80698400  
H 5.30811800 -2.09132500 -2.25154000  
H 5.40369500 -1.33364500 -0.63246000  
H 1.56036000 -2.34026200 -2.50123200  
H 3.12299900 -2.75522800 -3.26269500  
H 2.59929300 -3.61315100 -1.77646700  
H 2.35638300 0.20490300 -2.33965100  
H 3.93165900 0.55820600 -1.55827500  
H 3.86956500 -0.28820700 -3.13794900  
H -0.89381500 1.87914100 4.42853600  
H 0.89454600 1.87983000 4.42831900  
H -0.00023600 3.43099200 4.38272900  
H -0.00088300 4.52585500 1.90214600  
H -0.90194100 5.54178200 -0.11097900  
H 0.89898000 5.54233800 -0.11147700  
H -0.00196300 5.80292000 -1.63315600  
H 1.27733400 3.95615600 -2.75531000  
H 2.18805400 3.68339700 -1.23312200  
H 1.36096900 2.31788000 -2.04854000  
H -2.19039800 3.68221900 -1.23221900  
H -1.28044900 3.95494600 -2.75488400  
H -1.36294100 2.31685300 -2.04748100

<sup>OS</sup>IM3A

BP86/BS1 SCF energy in solution: -2358.293388 a.u.

BP86/BS2 SCF energy in solution: -2359.663943 a.u.

BP86/BS2 Free energy in solution: -2359.258224 a.u.

1 1

N 0.99272000 -2.00499100 -0.43491200  
N -1.18044100 -1.11679200 1.27564500  
C 2.29332700 -2.43685200 0.14134800  
C -1.30793100 -0.58085300 2.65215700  
C -2.52069500 -1.13827500 0.62200800  
C 1.07447800 -1.91291000 -1.93430700  
C -0.08669300 -2.94554400 0.00883300  
C -0.63894500 -2.50667800 1.35166300  
N 0.20552400 0.39093600 -1.61674600  
N -2.45335900 1.25343900 -0.24917700  
C 0.51323800 1.82712200 -1.85720700  
C -2.96553800 2.58683300 0.05148700  
C -3.20832700 0.22113000 0.45358200  
C 1.20757300 -0.45726500 -2.35014500

C -1.17977200 0.07461900 -2.10711100  
C -2.29728900 1.03443200 -1.68277200  
H -0.88615200 -2.94910400 -0.75628300  
H 0.30602200 -3.98405500 0.06980800  
H 0.16333900 -2.51331400 2.11730100  
H -1.42453600 -3.21864500 1.69679100  
H 3.07883900 -1.71672900 -0.14408100  
H 2.22693000 -2.44915600 1.24675100  
H 2.54650000 -3.45885000 -0.21799200  
H 1.94084100 -2.49323200 -2.31379000  
H 0.16714000 -2.37410200 -2.36877200  
H 2.20484500 -0.06812100 -2.07524300  
H 1.06297400 -0.34350400 -3.44735200  
H 0.27014800 2.09067700 -2.90977900  
H -0.07463000 2.45874700 -1.16989900  
H 1.58901900 2.00042700 -1.68598000  
H -1.14052500 0.09330900 -3.22064900  
H -1.41709700 -0.96369100 -1.82392700  
H -3.23626500 0.63652500 -2.15533200  
H -2.12126400 2.01843800 -2.16104100  
H -2.31741400 3.35966000 -0.41155300  
H -4.01374900 2.76043600 -0.31356100  
H -2.96166800 2.75765200 1.14794700  
H -4.19317900 0.00964900 -0.04800700  
H -3.46271000 0.62096800 1.45660900  
H -2.42628500 -1.65645400 -0.34975200  
H -3.20148000 -1.77200800 1.24038000  
H -0.33183400 -0.64841500 3.16797800  
H -1.60721700 0.48139700 2.62280600  
H -2.06231200 -1.16426200 3.22957800  
Co 0.53209800 -0.10942100 0.30136700  
O 1.41128700 2.25347600 1.37754500  
O 0.22857300 1.33675100 1.30774100  
N 2.29746900 0.46778400 0.20224000  
C 2.45000100 1.59784600 0.81115100  
C 3.75612500 2.33707200 0.96112600  
H 3.97918800 2.53950100 2.02957700  
H 3.71634100 3.31391000 0.43393000  
H 4.56997300 1.72821900 0.52411200

<sup>3</sup>IM3A

BP86/BS1 SCF energy in solution: -2358.299256 a.u.

BP86/BS2 SCF energy in solution: -2359.666506 a.u.

BP86/BS2 Free energy in solution: -2359.262161 a.u.

1 3

N 0.08927100 2.20807100 -0.10360200  
N -1.47969000 0.26683600 -1.62688800  
C 1.24769100 2.70827400 -0.86601700  
C -1.37202000 -0.50609200 -2.88216700  
C -2.71641100 -0.08965900 -0.89426500  
C 0.13329400 2.67929300 1.30012400  
C -1.18080700 2.58140200 -0.76037400  
C -1.45018700 1.70848000 -1.97044900  
N 0.22061700 0.28945300 2.01359600  
N -1.45264100 -1.58201200 0.66466000  
C 1.04385500 -0.65841900 2.79862800  
C -0.97512800 -2.98505000 0.68266800  
C -2.60145900 -1.47309400 -0.27543700  
C 0.79675700 1.64598100 2.19658100  
C -1.21236700 0.22331900 2.39206500  
C -1.80462100 -1.13827300 2.05137300  
H -1.99656000 2.47296400 -0.01780900  
H -1.17430400 3.65351600 -1.07327200  
H -0.65695900 1.85236800 -2.73109800  
H -2.41064400 2.01444100 -2.44972000  
H 2.18346400 2.40003100 -0.36612100  
H 1.25696900 2.27729000 -1.88607900  
H 1.21644000 3.82107900 -0.94997600  
H 0.68401700 3.64344500 1.38644300  
H -0.90136300 2.88330400 1.63944200  
H 1.87216700 1.55858700 1.94951600  
H 0.71127400 1.95725400 3.26378000  
H 1.00708100 -0.40258200 3.88251000  
H 0.69585000 -1.69885500 2.67289500  
H 2.08869100 -0.59618100 2.44205800  
H -1.34093300 0.42866800 3.48168800  
H -1.75324400 1.01589800 1.84164900  
H -2.90765900 -1.09554300 2.17771500  
H -1.43999900 -1.90230500 2.76559800  
H -0.09915700 -3.08400300 1.35211400  
H -1.77360100 -3.67595000 1.04021000  
H -0.66305700 -3.28010400 -0.33534300  
H -3.55381100 -1.73557900 0.23872700  
H -2.45670200 -2.22916500 -1.07177400  
H -2.89510000 0.66914500 -0.10693900  
H -3.59880200 -0.06212600 -1.57847800  
H -0.42254500 -0.25576400 -3.39049000  
H -1.36888600 -1.59221900 -2.68513800



H -2.22348100 -0.26295200 -3.56144000  
Co 0.26962800 -0.22288800 -0.10676700  
O 2.14320700 -1.71336200 -1.52652900  
O 0.66848300 -1.53508300 -1.28467700  
N 2.12836100 -0.00138300 0.03239200  
C 2.76476100 -0.83099000 -0.73563900  
C 4.26921700 -0.90727500 -0.84013500  
H 4.59959600 -0.73266800 -1.88533800  
H 4.63270800 -1.91036100 -0.53349800  
H 4.71821500 -0.14024300 -0.18231500

### <sup>5</sup>IM3A

BP86/BS1 SCF energy in solution: -2358.283089 a.u.

BP86/BS2 SCF energy in solution: -2359.648132 a.u.

BP86/BS2 Free energy in solution: -2359.245595 a.u.

1 5

N 0.54267400 2.03874500 0.73969800  
N 1.58926600 -0.59222900 1.45515100  
C -0.39501400 2.53841400 1.76683500  
C 1.38018000 -1.65353700 2.46491400  
C 2.59711200 -1.01774500 0.44779200  
C 0.53801200 2.92040700 -0.45728400  
C 1.90840000 1.88063400 1.29034800  
C 2.01522600 0.64194900 2.16451000  
N -0.27845900 1.00601400 -1.85265700  
N 0.86559400 -1.58029200 -1.27716500  
C -1.37638600 0.60477300 -2.75128800  
C -0.00166800 -2.72803700 -1.63431800  
C 2.03367400 -2.07050900 -0.49627400  
C -0.45281300 2.43670900 -1.50716400  
C 1.05293900 0.68201600 -2.40727400  
C 1.26446100 -0.83120900 -2.51378900  
H 2.61366900 1.80978300 0.43789600  
H 2.21085200 2.77649200 1.88311400  
H 1.36950900 0.74568100 3.05947200  
H 3.06204600 0.53638700 2.53544100  
H -1.40392600 2.64387200 1.32853200  
H -0.47172100 1.82125200 2.60705700  
H -0.05429300 3.52302800 2.16585400  
H 0.28614700 3.96830200 -0.17762800  
H 1.56384300 2.95209800 -0.87392200  
H -1.48827600 2.53469800 -1.12476300  
H -0.36541300 3.07500600 -2.41918300  
H -1.33276700 1.17244500 -3.71080900

H -1.33581700 -0.47437900 -2.98569100  
H -2.34184500 0.81230000 -2.25242400  
H 1.19692000 1.14114400 -3.41556800  
H 1.82135100 1.11869600 -1.74007400  
H 2.33187000 -1.02408300 -2.75486000  
H 0.67692600 -1.23337600 -3.36244400  
H -0.89758300 -2.37191500 -2.17793900  
H 0.54199100 -3.45397400 -2.28268400  
H -0.33856100 -3.23022300 -0.71011600  
H 2.84027800 -2.42403200 -1.17867900  
H 1.70174200 -2.95383200 0.08338900  
H 2.92452500 -0.13054500 -0.12954600  
H 3.50265200 -1.42390200 0.95837400  
H 0.59559200 -1.33533400 3.17589500  
H 1.04464300 -2.59097100 1.99004700  
H 2.32534100 -1.84375800 3.02583900  
Co -0.20670600 -0.09364200 0.12582500  
O -2.38156300 -1.67973700 1.16833100  
O -0.98173200 -1.71132500 0.96058000  
N -2.10033900 0.44986000 0.32100600  
C -2.88132600 -0.44719200 0.77920400  
C -4.37482600 -0.39039800 0.98651800  
H -4.63307000 -0.56149900 2.05271100  
H -4.88431600 -1.17581100 0.38929400  
H -4.75387100 0.60094900 0.67624300

### <sup>3</sup>TS4A

BP86/BS1 SCF energy in solution: -2358.285441 a.u.

BP86/BS2 SCF energy in solution: -2359.656672 a.u.

BP86/BS2 Free energy in solution: -2359.2573 a.u.

1 3

N -0.94087700 1.99467200 -0.58636900  
N 1.14687500 1.23209500 1.33749500  
C -2.27073900 2.45428200 -0.12980800  
C 1.16567900 0.76809600 2.74021200  
C 2.50276000 1.18557000 0.74001100  
C -0.92568300 1.81291700 -2.07290500  
C 0.11895000 2.94551800 -0.13368100  
C 0.58814700 2.60841900 1.27011800  
N -0.08739400 -0.52070900 -1.71896200  
N 2.50160800 -1.24254500 -0.07052300  
C -0.41259800 -1.94598700 -1.95618700  
C 2.77100800 -2.58908400 0.40978400  
C 3.18241300 -0.19246400 0.67662600

C -1.06373700 0.34537900 -2.45096400  
C 1.31396800 -0.20863000 -2.10750500  
C 2.42699500 -1.10587800 -1.51873200  
H 0.96507300 2.88679300 -0.84567600  
H -0.25425800 3.99376400 -0.16778200  
H -0.26274400 2.65822000 1.97965400  
H 1.34134500 3.35739900 1.61166800  
H -3.03514000 1.70533600 -0.40342700  
H -2.27694900 2.55478800 0.97279600  
H -2.51764400 3.43905400 -0.58692700  
H -1.75139000 2.38492200 -2.54724500  
H 0.01603500 2.23393900 -2.47514600  
H -2.07098000 -0.02873300 -2.18546800  
H -0.92125300 0.22149500 -3.54909900  
H -0.19713000 -2.21481500 -3.01473400  
H 0.17585800 -2.58770200 -1.27795600  
H -1.48451600 -2.11358200 -1.74978200  
H 1.39609300 -0.31760000 -3.21412000  
H 1.50465800 0.85498400 -1.87709800  
H 3.38225200 -0.68303800 -1.91868900  
H 2.33393700 -2.12194400 -1.94859800  
H 2.11266400 -3.31677500 -0.10308500  
H 3.83286300 -2.89441300 0.22839600  
H 2.57562800 -2.65133900 1.49842900  
H 4.19932800 -0.00829200 0.24369000  
H 3.34782200 -0.57179400 1.70402800  
H 2.45303500 1.63278900 -0.27029100  
H 3.18324200 1.83814700 1.33941200  
H 0.14569300 0.84076000 3.16516200  
H 1.48091300 -0.28978300 2.78690800  
H 1.85755300 1.38813000 3.35719900  
Co -0.45259300 -0.01326700 0.28896400  
O 0.16778200 -1.36238900 0.96791800  
O -1.98991400 -2.63767300 1.09982900  
N -2.19109700 -0.41000400 0.38017100  
C -2.63302400 -1.58003700 0.89445800  
C -4.13425300 -1.56988500 1.23202500  
H -4.27390900 -1.92554000 2.27391200  
H -4.65743400 -2.28356300 0.56072800  
H -4.58669100 -0.56676700 1.11575600

<sup>5</sup>TS4A

BP86/BS1 SCF energy in solution: -2358.264097 a.u.

BP86/BS2 SCF energy in solution: -2359.631893 a.u.

BP86/BS2 Free energy in solution: -2359.233067 a.u.

1 5

N -0.19695400 2.23659200 0.07348100  
N -1.56921900 0.24312700 -1.56103900  
C 0.88407200 2.93018100 -0.65266500  
C -1.47546500 -0.41393400 -2.88526900  
C -2.68957500 -0.32223700 -0.76297000  
C -0.16249900 2.56352600 1.52057000  
C -1.51652200 2.52491100 -0.52849700  
C -1.73454700 1.70459100 -1.78782300  
N 0.29599600 0.16234500 2.05194200  
N -1.19865400 -1.82372700 0.60037800  
C 1.29265900 -0.72186800 2.68709300  
C -0.56890800 -3.15681800 0.46201600  
C -2.39363900 -1.73841500 -0.28276500  
C 0.69127600 1.56981500 2.29447000  
C -1.08314400 -0.14687700 2.48972900  
C -1.50742900 -1.54382700 2.03880700  
H -2.29818200 2.29698300 0.22290200  
H -1.62267700 3.60757300 -0.77742500  
H -1.00375800 1.99593000 -2.56846400  
H -2.74914500 1.91198500 -2.20111000  
H 1.86111300 2.66193000 -0.21140100  
H 0.90300100 2.61313700 -1.71358100  
H 0.73994100 4.03595600 -0.61071500  
H 0.23521700 3.59041500 1.68879200  
H -1.20103000 2.56948900 1.90584800  
H 1.75028800 1.65294400 1.97805000  
H 0.64447700 1.80677400 3.38421000  
H 1.28061300 -0.60134200 3.79578500  
H 1.10154200 -1.78416300 2.44951500  
H 2.29648100 -0.46034700 2.30352600  
H -1.17659500 -0.08054900 3.60069500  
H -1.76783500 0.61051600 2.06205100  
H -2.59492600 -1.66901100 2.22982000  
H -0.99248500 -2.30885000 2.65185200  
H 0.36020100 -3.19974400 1.06213800  
H -1.25927900 -3.95868500 0.81209600  
H -0.30137600 -3.32567300 -0.59587600  
H -3.29174500 -2.13672000 0.24134200  
H -2.21479700 -2.40028900 -1.15195400  
H -2.87826900 0.34148600 0.10269000  
H -3.62147300 -0.33205700 -1.37588600  
H -0.59992100 -0.01537200 -3.42956100

H -1.33991500 -1.50306800 -2.77699400  
H -2.39828700 -0.20906800 -3.47577200  
Co 0.18229600 -0.12067200 -0.19478700  
O 2.41950900 -1.47847600 -1.72250400  
O 0.66283000 -1.33887200 -1.38525800  
N 2.12386900 0.22350900 -0.18065200  
C 2.87827900 -0.53291800 -0.92315100  
C 4.39354000 -0.39805900 -0.93018500  
H 4.75864200 -0.21333700 -1.96219000  
H 4.86026000 -1.33914600 -0.56989100  
H 4.70535800 0.43789800 -0.27407800

<sup>os</sup>IM4A

BP86/BS1 SCF energy in solution: -2358.288612 a.u.

BP86/BS2 SCF energy in solution: -2359.658299 a.u.

BP86/BS2 Free energy in solution: -2359.256207 a.u.

1 1

N 1.10724300 1.48041300 1.10068600  
N -1.11874200 1.66899800 -0.75987400  
C 2.45354300 1.97898700 0.73564500  
C -1.24894300 1.78035100 -2.23073000  
C -2.44921500 1.49491600 -0.11595000  
C 1.16165800 0.72508700 2.39388100  
C 0.13626100 2.61406700 1.15445100  
C -0.43706500 2.88239400 -0.22368300  
N 0.03646400 -1.16847900 1.21924200  
N -2.72297500 -1.06478700 -0.27256200  
C 0.22473800 -2.59354200 0.83493000  
C -3.27389700 -2.09435500 -1.14229500  
C -3.27616900 0.26509200 -0.51884300  
C 1.15823700 -0.77114700 2.13197000  
C -1.29335000 -0.94650300 1.86121700  
C -2.52412300 -1.48613700 1.11225500  
H -0.67282800 2.34948000 1.86255800  
H 0.62367300 3.53159600 1.55330600  
H 0.37188300 3.15143000 -0.93210100  
H -1.14407400 3.74332100 -0.18999000  
H 3.17173100 1.14087200 0.70630300  
H 2.42996300 2.44807500 -0.26592200  
H 2.79642000 2.73048600 1.48214600  
H 2.07301200 0.99365800 2.96922500  
H 0.29752200 1.02168600 3.01903800  
H 2.09228800 -1.09399700 1.62692800  
H 1.06708300 -1.33368800 3.08885300

H 0.08554900 -3.23655900 1.73207500  
H -0.49955700 -2.86755800 0.04950300  
H 1.25476200 -2.70752300 0.44200800  
H -1.28256400 -1.46740300 2.84637600  
H -1.39979800 0.13043900 2.07709600  
H -3.40703400 -1.19184800 1.73268200  
H -2.49608200 -2.59239500 1.11770800  
H -2.71241200 -3.04018500 -1.01506000  
H -4.35082000 -2.29325800 -0.91498500  
H -3.19741400 -1.77521000 -2.20002900  
H -4.24819000 0.37022100 0.02681200  
H -3.52044600 0.32144800 -1.59748200  
H -2.30909000 1.53439500 0.97950400  
H -3.07963000 2.37781300 -0.37869400  
H -0.24685200 1.93846900 -2.67384200  
H -1.66279400 0.84389800 -2.64358900  
H -1.90600900 2.63888600 -2.50015500  
Co 0.30969800 0.04042900 -0.39165100  
O -0.66390200 -0.92858700 -1.34226300  
O 3.18646900 -2.01134300 -0.24279200  
N 1.92403700 -0.27053300 -1.04138500  
C 2.99230300 -1.05960700 -1.05875300  
C 4.02133700 -0.74209800 -2.14134300  
H 4.13580500 -1.62818800 -2.80158300  
H 5.00574000 -0.54815100 -1.66497600  
H 3.73371900 0.13333000 -2.75795000

### <sup>3</sup>IM4A

BP86/BS1 SCF energy in solution: -2358.294348 a.u.

BP86/BS2 SCF energy in solution: -2359.665134 a.u.

BP86/BS2 Free energy in solution: -2359.266534 a.u.

1 3

N 1.04005800 1.82869400 0.81839300  
N -0.91313500 1.30385600 -1.29573600  
C 2.44136900 2.23157800 0.55528900  
C -0.83476900 0.90374500 -2.72088300  
C -2.33214000 1.36141100 -0.84285000  
C 0.84373700 1.53447000 2.27623000  
C 0.09802900 2.88218200 0.32950600  
C -0.26313600 2.63652600 -1.12243900  
N -0.20222800 -0.63517600 1.61475100  
N -2.67814400 -1.08966700 -0.18723100  
C -0.02591600 -2.10595000 1.72222400  
C -3.19759600 -2.34795100 -0.70616000

C -3.15142800 0.06712300 -0.93749500  
C 0.79176300 0.03541100 2.51691100  
C -1.59513000 -0.21768300 1.95651300  
C -2.73195200 -0.99064200 1.26762200  
H -0.80832000 2.86161100 0.96476800  
H 0.54678000 3.89333700 0.44555800  
H 0.64934700 2.64788700 -1.75171400  
H -0.93257900 3.44410300 -1.49825900  
H 3.12863000 1.42322200 0.86182600  
H 2.59014600 2.41038100 -0.52670200  
H 2.68020200 3.16287600 1.11554700  
H 1.66650700 1.97286400 2.87889700  
H -0.09094900 2.02077400 2.61632400  
H 1.77586200 -0.42779200 2.30919200  
H 0.52788700 -0.17588500 3.57811200  
H -0.26239000 -2.43532200 2.75868100  
H -0.69084200 -2.61673700 1.00472800  
H 1.02214700 -2.36084400 1.46821800  
H -1.73143900 -0.36053000 3.05419400  
H -1.68163500 0.86688900 1.76910700  
H -3.68196700 -0.50224700 1.60945100  
H -2.76004000 -2.02072300 1.67345200  
H -2.70431700 -3.20335700 -0.20168400  
H -4.30431700 -2.45683300 -0.56124300  
H -2.99082700 -2.42558200 -1.79262100  
H -4.19085800 0.35169600 -0.62100500  
H -3.23233300 -0.23644200 -2.00052100  
H -2.35198600 1.76337700 0.18651900  
H -2.86136400 2.11252600 -1.47637800  
H 0.22266300 0.91510900 -3.04703000  
H -1.22687300 -0.12050800 -2.85113900  
H -1.41757600 1.61012200 -3.35545800  
Co 0.49296300 -0.03675300 -0.25339700  
O -0.14083200 -1.34416400 -1.04739300  
O 2.91122200 -2.47755700 0.11425200  
N 2.18844500 -0.41492300 -0.48919100  
C 2.88862100 -1.53927100 -0.72196500  
C 3.70974900 -1.56846900 -1.99991200  
H 3.29535500 -2.35207300 -2.67002100  
H 4.75881800 -1.84323100 -1.76292500  
H 3.69097000 -0.59694800 -2.53347100

<sup>5</sup>IM4A

BP86/BS1 SCF energy in solution: -2358.292294 a.u.

BP86/BS2 SCF energy in solution: -2359.664603 a.u.

BP86/BS2 Free energy in solution: -2359.26572 a.u.

1 5

N -1.72682400 -1.92885300 0.17078400  
N 0.37428300 -0.66405600 -1.86947900  
C -3.15039900 -1.70793200 -0.01488100  
C 0.39331900 0.21958100 -3.06146100  
C 1.69041200 -1.33411300 -1.68239200  
C -1.32689400 -2.24920200 1.53419200  
C -1.05495200 -2.59770100 -0.93155400  
C -0.71551400 -1.66178500 -2.09123500  
N 0.33211200 -0.31911700 1.89008400  
N 2.44730200 0.30010300 0.08726900  
C 0.57504900 0.78500100 2.85727100  
C 3.20952300 1.56905100 0.16492500  
C 2.77009200 -0.37239900 -1.20647300  
C -0.90404600 -1.02413900 2.34581600  
C 1.49032900 -1.24858700 1.80976100  
C 2.73481200 -0.54169800 1.29182200  
H -0.14560500 -3.10106600 -0.54677500  
H -1.69541900 -3.40931500 -1.36170200  
H -1.62163500 -1.09110300 -2.37749800  
H -0.43456100 -2.27993500 -2.97716600  
H -3.53890400 -1.00304100 0.74612900  
H -3.35520600 -1.27035600 -1.01243500  
H -3.73182200 -2.66313900 0.06449100  
H -2.17368900 -2.71619400 2.09120300  
H -0.52544300 -3.01556800 1.51790000  
H -1.71766400 -0.27238600 2.32063700  
H -0.75355800 -1.33360700 3.40681800  
H 0.78121500 0.37440100 3.87168600  
H 1.42702300 1.41784900 2.55027300  
H -0.32787600 1.42294700 2.90457000  
H 1.70329200 -1.69235900 2.81086100  
H 1.21449600 -2.07809800 1.13381900  
H 3.51905400 -1.29414200 1.06016700  
H 3.15234500 0.12032900 2.07412500  
H 2.97098500 2.10157600 1.10526900  
H 4.30435200 1.36860700 0.13718300  
H 2.92717300 2.21502500 -0.68654000  
H 3.73454500 -0.92090800 -1.11885700  
H 2.92313300 0.42533700 -1.95898400  
H 1.56684600 -2.16143700 -0.95884000  
H 2.01824000 -1.79390000 -2.64432500



H -0.57183000 0.75469700 -3.13421400  
H 1.19497400 0.97326400 -2.97823600  
H 0.54396700 -0.38696200 -3.98375700  
Co 0.25822800 0.68145200 -0.05294400  
O -1.60771100 3.31293300 0.20928300  
O 0.63603900 2.04864700 -0.92702400  
N -1.48696400 1.03142200 0.16776900  
C -2.14008100 2.20191800 -0.01889300  
C -3.60826100 2.09969200 -0.41430100  
H -3.89934300 3.01540100 -0.96770200  
H -4.23874900 2.03530700 0.49828400  
H -3.80881100 1.20433700 -1.03553500

<sup>o</sup>TS5A

BP86/BS1 SCF energy in solution: -2358.269592 a.u.

BP86/BS2 SCF energy in solution: -2359.638717 a.u.

BP86/BS2 Free energy in solution: -2359.237073 a.u.

1 1

N 0.94801800 0.49685300 1.70817800  
N -0.72959300 1.93808500 -0.05003500  
C 2.43111800 0.58680400 1.61808600  
C -0.73333400 2.65415200 -1.34527200  
C -2.10429100 1.77297800 0.52606400  
C 0.58856500 -0.61977000 2.62838600  
C 0.40692200 1.81884500 2.14299600  
C 0.15177800 2.66631600 0.91019600  
N -0.31509600 -1.82733200 0.66716300  
N -2.43784600 -0.33539600 -0.77612400  
C -0.05325100 -2.96888300 -0.24032000  
C -2.65033700 -0.58303400 -2.20759700  
C -3.04179500 0.93822500 -0.34013800  
C 0.60122500 -1.91941800 1.84530000  
C -1.73845900 -1.78543800 1.13800500  
C -2.74984800 -1.53176200 0.02785500  
H -0.52027000 1.65263300 2.72312900  
H 1.12089700 2.33471400 2.82091900  
H 1.10229600 2.87517600 0.37970800  
H -0.30646200 3.64407300 1.18158700  
H 2.85025900 -0.36049200 1.23588400  
H 2.72404700 1.40131400 0.93295700  
H 2.84388300 0.78977700 2.63113400  
H 1.30281100 -0.67603400 3.47914700  
H -0.40978800 -0.41473500 3.06021400  
H 1.61454400 -2.13236400 1.45140000

H 0.30167800 -2.77600700 2.49039900  
H -0.19476500 -3.92712300 0.30777400  
H -0.73718400 -2.93608300 -1.10607400  
H 0.98649100 -2.87886800 -0.60909200  
H -1.97187200 -2.75013200 1.64576900  
H -1.82074500 -0.98799400 1.89937300  
H -3.76012100 -1.45835000 0.49462300  
H -2.78522200 -2.40325500 -0.65487100  
H -2.06603000 -1.46610700 -2.52816000  
H -3.72873200 -0.76161200 -2.44040800  
H -2.30350900 0.28314000 -2.80254000  
H -3.97854400 0.76755200 0.23953100  
H -3.33556600 1.50883500 -1.24349900  
H -1.99654100 1.29130300 1.51528400  
H -2.54579500 2.78255000 0.69637200  
H 0.29963000 2.66433700 -1.74173800  
H -1.38565900 2.14517200 -2.07528400  
H -1.09066800 3.69857900 -1.20509500  
Co 0.07494400 0.01322400 -0.24149600  
O 0.14463900 -0.56202900 -1.84741600  
O 2.84836200 -1.48733700 -0.96867700  
N 1.68563900 0.53421300 -1.19366500  
C 2.75615400 -0.29086000 -1.33930400  
C 3.95877400 0.39978500 -1.99064900  
H 4.26578500 -0.17992800 -2.88755700  
H 4.81389100 0.39044400 -1.28158900  
H 3.74656500 1.44476100 -2.29042500

### <sup>3</sup>TS5A

BP86/BS1 SCF energy in solution: -2358.276781 a.u.

BP86/BS2 SCF energy in solution: -2359.646319 a.u.

BP86/BS2 Free energy in solution: -2359.245764 a.u.

1 3

N 1.09621100 0.86944200 1.50755500  
N -0.74799500 1.91692600 -0.40113600  
C 2.55068900 1.07798000 1.26681300  
C -0.75986600 2.37807200 -1.80589500  
C -2.12997800 1.79451700 0.16884000  
C 0.92268800 -0.09827400 2.63815900  
C 0.43227800 2.18580000 1.76091300  
C 0.07602200 2.83960600 0.43521700  
N -0.19686400 -1.59507500 1.01189000  
N -2.62331400 -0.59194200 -0.61266600  
C -0.09239100 -2.90045700 0.31820000

C -3.12402900 -1.26177000 -1.81426200  
C -3.06957500 0.80273100 -0.52679300  
C 0.84787900 -1.50933800 2.07885200  
C -1.56359200 -1.35656400 1.58130800  
C -2.73315100 -1.42723200 0.58924500  
H -0.47333600 2.00431800 2.37113700  
H 1.09581800 2.85352000 2.35316500  
H 0.99216300 3.07643700 -0.14166500  
H -0.46609000 3.79774200 0.60569300  
H 3.04734300 0.10792900 1.08560100  
H 2.70803700 1.72436800 0.38562900  
H 3.00555000 1.55414600 2.16369200  
H 1.76443700 -0.01712900 3.35919000  
H 0.00255400 0.16329100 3.19454300  
H 1.80594300 -1.79918700 1.60261400  
H 0.62853600 -2.24234300 2.88860100  
H -0.21877900 -3.72970500 1.04968100  
H -0.86822000 -2.97606200 -0.46347800  
H 0.90221700 -2.94221800 -0.16672600  
H -1.74615300 -2.11660200 2.37656800  
H -1.55572400 -0.36933500 2.07995300  
H -3.65236800 -1.17317900 1.17362300  
H -2.86318200 -2.47481800 0.25506900  
H -2.65259300 -2.25828800 -1.92109200  
H -4.23412600 -1.40360000 -1.78723800  
H -2.87488200 -0.66655300 -2.71416900  
H -4.04849100 0.87498500 0.01178700  
H -3.26275000 1.14848800 -1.56133800  
H -2.03536300 1.53366400 1.23982000  
H -2.61355100 2.79850700 0.12604500  
H 0.27904000 2.38204800 -2.18639300  
H -1.35418900 1.68815600 -2.43029100  
H -1.18710500 3.40367700 -1.87685600  
Co 0.15071300 0.01713000 -0.20229900  
O -0.19640000 -0.71106000 -1.65331200  
O 2.64912800 -1.88890400 -0.98383600  
N 1.72366900 0.21582600 -1.43666400  
C 2.69860600 -0.70852800 -1.42026000  
C 4.00828500 -0.17107000 -2.01939000  
H 4.29163700 -0.81061600 -2.88272300  
H 4.81233200 -0.25389700 -1.25808100  
H 3.93509000 0.88037200 -2.36165000

<sup>5</sup>TS5A

BP86/BS1 SCF energy in solution: -2358.278811 a.u.

BP86/BS2 SCF energy in solution: -2359.648161 a.u.

BP86/BS2 Free energy in solution: -2359.24917 a.u.

1 5

N 1.07669300 0.75069800 -1.63241300  
N -0.25472100 -1.75180900 -0.96226500  
C 2.53217700 0.88983900 -1.43351700  
C -0.05120000 -3.01649000 -0.21733600  
C -1.63592600 -1.61718800 -1.49756200  
C 0.47365800 2.07312300 -1.92106800  
C 0.80378100 -0.26981200 -2.67099800  
C 0.75517900 -1.65892900 -2.04975700  
N -0.77309600 1.99056000 0.23505400  
N -2.35850700 -0.45765500 0.61755700  
C -0.83360000 2.57976800 1.58995400  
C -2.68789100 -0.94315000 1.97351900  
C -2.68080400 -1.50382700 -0.39348000  
C 0.12968900 2.79718800 -0.62541900  
C -2.12038900 1.84464200 -0.38178000  
C -3.00770600 0.86209200 0.37427600  
H -0.15538300 -0.02398500 -3.16701300  
H 1.58248500 -0.25285600 -3.46774600  
H 1.73609500 -1.91771100 -1.60261400  
H 0.54019400 -2.41945900 -2.83662300  
H 2.74443400 1.57562400 -0.59297700  
H 2.98701400 -0.09236900 -1.20793600  
H 3.00844600 1.29565300 -2.35664800  
H 1.16523200 2.70756800 -2.52181000  
H -0.43127100 1.92232200 -2.54128700  
H 1.05037500 2.99195000 -0.03969700  
H -0.33297800 3.78585800 -0.85292600  
H -1.25898700 3.60915300 1.55655100  
H -1.45305500 1.95742700 2.26151200  
H 0.19064400 2.62185000 2.00660600  
H -2.63011700 2.83574000 -0.43205700  
H -1.98490900 1.49242100 -1.42250800  
H -3.95537700 0.73066500 -0.19370800  
H -3.28673800 1.28741300 1.35780000  
H -2.39296500 -0.18904200 2.72630300  
H -3.78149700 -1.14020500 2.06661900  
H -2.13505400 -1.87795200 2.18329100  
H -3.67045100 -1.30291000 -0.86026700  
H -2.77356900 -2.47050500 0.13807700  
H -1.66881400 -0.71144600 -2.13328500

H -1.88084900 -2.48883900 -2.14911100  
 H 0.94783800 -2.97995500 0.25843800  
 H -0.80614100 -3.12420700 0.58222900  
 H -0.12748300 -3.88985100 -0.90495500  
 Co -0.01726000 -0.05708800 0.39342800  
 O 2.64371300 -1.75239100 1.27876400  
 O 0.03125900 -0.78351800 1.94686000  
 N 1.61991300 0.36855900 1.29651900  
 C 2.65444900 -0.51130200 1.40040600  
 C 3.96300600 0.21910800 1.74073200  
 H 4.73869200 -0.06882900 1.00154300  
 H 4.29894100 -0.12938700 2.74114400  
 H 3.86297200 1.32165900 1.76652700

${}^2[\text{CoL}]^{2+}$ , L=13-TMC

BP86/BS1 SCF energy in solution: -2114.50922666 a.u.

BP86/BS2 SCF energy in solution: -2115.57782275 a.u.

BP86/BS2 Free energy in solution: -2115.19204575 a.u.

2 2

|    |             |             |             |
|----|-------------|-------------|-------------|
| Co | -0.11372800 | -0.06802900 | 0.47638100  |
| N  | 0.26408700  | 1.81458900  | -0.28136300 |
| N  | -2.06833400 | 0.35886200  | 0.37681900  |
| N  | -0.49578900 | -1.69440300 | -0.63796400 |
| C  | 1.95513500  | -1.83986500 | -0.42128100 |
| H  | 2.05245300  | -2.78778900 | 0.14324000  |
| H  | 2.90102500  | -1.70425700 | -0.98346800 |
| C  | 1.31907800  | 1.71756200  | -1.32865500 |
| H  | 1.43354100  | 2.71411900  | -1.81585900 |
| H  | 0.91590700  | 1.03273200  | -2.09968500 |
| C  | -1.61356400 | -1.22747500 | -1.50891900 |
| H  | -2.04572500 | -2.07491700 | -2.08902200 |
| H  | -1.19001100 | -0.50631800 | -2.23408500 |
| C  | -1.03973600 | 2.18749600  | -0.92137300 |
| H  | -1.11225700 | 1.64914700  | -1.88634800 |
| H  | -1.06328300 | 3.27743300  | -1.14766900 |
| C  | -2.68687100 | -0.57288800 | -0.64483300 |
| H  | -3.41054700 | -0.02250200 | -1.28041900 |
| H  | -3.26289900 | -1.34140700 | -0.09454400 |
| C  | 0.77666000  | -1.90027300 | -1.39009800 |
| H  | 0.84548500  | -1.09682300 | -2.14850000 |
| H  | 0.76601500  | -2.87330100 | -1.93238000 |
| C  | 0.61136100  | 2.82107800  | 0.75661400  |
| H  | 1.55882400  | 2.56214600  | 1.25969500  |
| H  | -0.18158400 | 2.86818700  | 1.52627900  |

|   |             |             |             |
|---|-------------|-------------|-------------|
| H | 0.72003100  | 3.82708800  | 0.29210600  |
| C | -0.88259100 | -2.90964300 | 0.12502600  |
| H | -1.19333400 | -3.71499600 | -0.57678000 |
| H | -1.72103700 | -2.68650000 | 0.80991900  |
| H | -0.03084100 | -3.27574200 | 0.72576700  |
| C | -2.67051100 | 0.13035600  | 1.71584700  |
| H | -3.75844100 | 0.36606700  | 1.71268100  |
| H | -2.16747900 | 0.77481700  | 2.46239100  |
| H | -2.53742400 | -0.92946900 | 2.00623100  |
| C | -2.18484100 | 1.80416900  | -0.00247300 |
| H | -2.15001400 | 2.39957900  | 0.93105500  |
| H | -3.16623200 | 2.00731000  | -0.48263500 |
| C | 2.78517500  | 0.37096000  | 0.41250100  |
| H | 3.80084500  | -0.08223600 | 0.47106300  |
| H | 2.68679100  | 1.01411300  | 1.30808400  |
| C | 2.70350500  | 1.22036400  | -0.86125200 |
| H | 3.15113300  | 0.67100400  | -1.71556000 |
| H | 3.37768500  | 2.08293200  | -0.67810700 |
| C | 1.89027500  | -1.23271300 | 1.97208500  |
| H | 2.90380100  | -1.65449500 | 2.15500800  |
| H | 1.13825000  | -2.02573500 | 2.14421700  |
| H | 1.71437500  | -0.40391400 | 2.68537300  |
| N | 1.77391400  | -0.71394300 | 0.57829600  |

$^4[\text{CoL}]^{2+}$ , L=13-TMC

BP86/BS1 SCF energy in solution: -2114.50190395 a.u.

BP86/BS2 SCF energy in solution: -2115.5666991 a.u.

BP86/BS2 Free energy in solution: -2115.1832251 a.u.

2 4

|    |             |             |             |
|----|-------------|-------------|-------------|
| Co | -0.07050400 | -0.08036700 | 0.60455400  |
| N  | 0.00181400  | 1.88160800  | -0.29335400 |
| N  | -2.21039500 | 0.11549700  | 0.40133500  |
| N  | -0.30743300 | -1.75809100 | -0.67815100 |
| C  | 2.18973200  | -1.58742600 | -0.51580300 |
| H  | 2.41548800  | -2.55313200 | -0.02237900 |
| H  | 3.07857300  | -1.33436900 | -1.13104900 |
| C  | 1.07243200  | 1.85088200  | -1.32898300 |
| H  | 1.06487400  | 2.81329700  | -1.89311100 |
| H  | 0.76427600  | 1.06753800  | -2.04892700 |
| C  | -1.50085600 | -1.41060100 | -1.48943500 |
| H  | -1.84876000 | -2.28274900 | -2.09043600 |
| H  | -1.20215100 | -0.61763900 | -2.20195100 |
| C  | -1.32939900 | 2.03260100  | -0.94989200 |
| H  | -1.29974000 | 1.47110800  | -1.90429800 |

|   |             |             |             |
|---|-------------|-------------|-------------|
| H | -1.51822700 | 3.09967400  | -1.20903900 |
| C | -2.64272300 | -0.92936800 | -0.58554600 |
| H | -3.47878000 | -0.55174900 | -1.21385400 |
| H | -3.04194400 | -1.78540900 | -0.00742200 |
| C | 0.96861100  | -1.74437200 | -1.44369100 |
| H | 0.91513300  | -0.90264000 | -2.16139000 |
| H | 1.08497300  | -2.67658800 | -2.04288800 |
| C | 0.22320100  | 2.94558900  | 0.71032300  |
| H | 1.18973400  | 2.80045700  | 1.22728400  |
| H | -0.58110800 | 2.92784500  | 1.47058600  |
| H | 0.22948900  | 3.94772900  | 0.22312700  |
| C | -0.48935600 | -3.01931700 | 0.07128900  |
| H | -0.57904200 | -3.88122200 | -0.62863000 |
| H | -1.40391900 | -2.97190800 | 0.69179300  |
| H | 0.37115500  | -3.19917200 | 0.74251500  |
| C | -2.85204300 | -0.11282800 | 1.71931500  |
| H | -3.95925600 | -0.00077500 | 1.66232100  |
| H | -2.46124800 | 0.61837900  | 2.45432800  |
| H | -2.61875900 | -1.13463500 | 2.07671800  |
| C | -2.45191400 | 1.51500800  | -0.05548400 |
| H | -2.53210000 | 2.14857800  | 0.84994000  |
| H | -3.42436500 | 1.59437500  | -0.59152500 |
| C | 2.77518400  | 0.69959000  | 0.38668000  |
| H | 3.86310600  | 0.45194000  | 0.40591500  |
| H | 2.57869800  | 1.29142400  | 1.30325900  |
| C | 2.51406200  | 1.57245200  | -0.85237400 |
| H | 3.04647000  | 1.15181200  | -1.73145700 |
| H | 3.02908400  | 2.53149900  | -0.63212400 |
| C | 2.31116700  | -1.11911000 | 1.89945300  |
| H | 3.38756400  | -1.39877400 | 1.97099700  |
| H | 1.69678100  | -2.01902500 | 2.09329000  |
| H | 2.09236800  | -0.36406300 | 2.68008300  |
| N | 1.98982100  | -0.55765800 | 0.56163500  |

${}^2[\text{CoL}]^{2+}$ , L=14-TMC

BP86/BS1 SCF energy in solution: -2153.80071714 a.u.

BP86/BS2 SCF energy in solution: -2154.91451191 a.u.

BP86/BS2 Free energy in solution: -2154.50129891 a.u.

2 2

|    |             |             |             |
|----|-------------|-------------|-------------|
| Co | -0.00002300 | 0.00000900  | 0.27508500  |
| N  | 1.14424800  | -1.66158500 | -0.20587300 |
| N  | -1.14424500 | 1.66167700  | -0.20585900 |
| N  | -1.60974400 | -1.29155600 | 0.33144500  |
| N  | 1.60976200  | 1.29149500  | 0.33147500  |

|   |             |             |             |
|---|-------------|-------------|-------------|
| C | 2.58948700  | 1.07732700  | -0.78610800 |
| H | 3.41028900  | 1.81827800  | -0.65306900 |
| H | 2.06648300  | 1.33454800  | -1.72940600 |
| C | -1.04843800 | -2.67777800 | 0.17337700  |
| H | -1.82965800 | -3.36578400 | -0.21509400 |
| H | -0.76038100 | -3.05196100 | 1.17425100  |
| C | 3.18492700  | -0.31948200 | -0.91366700 |
| H | 3.79250800  | -0.58812000 | -0.02455400 |
| H | 3.90970800  | -0.27717500 | -1.75392700 |
| C | -2.17649400 | 1.40930200  | -1.25604400 |
| H | -1.63087400 | 1.13551600  | -2.18248000 |
| H | -2.70708500 | 2.36960400  | -1.45347700 |
| C | 1.04846100  | 2.67773100  | 0.17362600  |
| H | 1.82969500  | 3.36582600  | -0.21467000 |
| H | 0.76035500  | 3.05171400  | 1.17455800  |
| C | -3.18484000 | 0.31958200  | -0.91363800 |
| H | -3.79228400 | 0.58827100  | -0.02444700 |
| H | -3.90974200 | 0.27731000  | -1.75379500 |
| C | -0.14570800 | 2.63103100  | -0.74960600 |
| H | -0.60935700 | 3.63795800  | -0.85525800 |
| H | 0.14327300  | 2.28856200  | -1.76320900 |
| C | 1.77076600  | -2.23907900 | 1.01920200  |
| H | 1.04144800  | -2.29307300 | 1.84768000  |
| H | 2.62117800  | -1.62284700 | 1.35466600  |
| H | 2.14579400  | -3.26343800 | 0.79972700  |
| C | -2.58949200 | -1.07726700 | -0.78610800 |
| H | -3.41033900 | -1.81817400 | -0.65310000 |
| H | -2.06651000 | -1.33448300 | -1.72942000 |
| C | 0.14577700  | -2.63091700 | -0.74978300 |
| H | 0.60949200  | -3.63780800 | -0.85551700 |
| H | -0.14314200 | -2.28835700 | -1.76337400 |
| C | 2.17662500  | -1.40928200 | -1.25595300 |
| H | 1.63108600  | -1.13564000 | -2.18247800 |
| H | 2.70726300  | -2.36959100 | -1.45322500 |
| C | -1.77105500 | 2.23912000  | 1.01909800  |
| H | -1.04205800 | 2.29276900  | 1.84787300  |
| H | -2.62180600 | 1.62305800  | 1.35399100  |
| H | -2.14574000 | 3.26362100  | 0.79968900  |
| C | -2.28009100 | -1.21335200 | 1.65619500  |
| H | -3.05564700 | -2.00669800 | 1.74338800  |
| H | -2.77065300 | -0.23595500 | 1.79886400  |
| H | -1.53087500 | -1.35424700 | 2.45874000  |
| C | 2.28017000  | 1.21306500  | 1.65617400  |
| H | 3.05577600  | 2.00635500  | 1.74345200  |



|   |            |            |            |
|---|------------|------------|------------|
| H | 2.77069700 | 0.23561900 | 1.79862100 |
| H | 1.53101700 | 1.35386400 | 2.45879300 |

$^4[\text{CoL}]^{2+}$ , L=14-TMC

BP86/BS1 SCF energy in solution: -2153.78910512 a.u.

BP86/BS2 SCF energy in solution: -2154.90015423 a.u.

BP86/BS2 Free energy in solution: -2154.48977623 a.u.

2 4

|    |             |             |             |
|----|-------------|-------------|-------------|
| Co | 0.00002600  | -0.00000600 | 0.32412100  |
| N  | -0.88806000 | 1.86626200  | -0.22033000 |
| N  | 0.88804700  | -1.86627100 | -0.22033600 |
| N  | 1.88247300  | 1.11850600  | 0.34325100  |
| N  | -1.88247300 | -1.11849700 | 0.34326200  |
| C  | -2.73987200 | -0.70223600 | -0.80930400 |
| H  | -3.68176100 | -1.30053700 | -0.77166400 |
| H  | -2.21192000 | -0.99741400 | -1.73975200 |
| C  | 1.47401900  | 2.54132300  | 0.14815500  |
| H  | 2.31466300  | 3.13576200  | -0.27682900 |
| H  | 1.25379700  | 2.97409500  | 1.14345100  |
| C  | -3.09776000 | 0.78354500  | -0.89844400 |
| H  | -3.63745100 | 1.12313700  | 0.01010400  |
| H  | -3.84074400 | 0.87343500  | -1.71945900 |
| C  | 1.95412000  | -1.73617500 | -1.25350700 |
| H  | 1.45671400  | -1.38885800 | -2.18337500 |
| H  | 2.36791900  | -2.75051400 | -1.46525200 |
| C  | -1.47403300 | -2.54131500 | 0.14816300  |
| H  | -2.31468500 | -3.13574600 | -0.27681700 |
| H  | -1.25380800 | -2.97410200 | 1.14345100  |
| C  | 3.09775200  | -0.78355000 | -0.89844000 |
| H  | 3.63745000  | -1.12315100 | 0.01010200  |
| H  | 3.84072800  | -0.87345900 | -1.71945800 |
| C  | -0.25501500 | -2.65500300 | -0.75785600 |
| H  | 0.03221900  | -3.72592900 | -0.87234200 |
| H  | -0.47981400 | -2.26624400 | -1.77192900 |
| C  | -1.40855100 | 2.48010400  | 1.02522800  |
| H  | -0.64114500 | 2.46132000  | 1.82200900  |
| H  | -2.29163000 | 1.92842700  | 1.39052400  |
| H  | -1.70318100 | 3.53870500  | 0.84110500  |
| C  | 2.73987300  | 0.70223700  | -0.80931200 |
| H  | 3.68176400  | 1.30053300  | -0.77167500 |
| H  | 2.21192200  | 0.99740100  | -1.73976400 |
| C  | 0.25499700  | 2.65500000  | -0.75785200 |
| H  | -0.03224900 | 3.72592300  | -0.87234500 |
| H  | 0.47979500  | 2.26625100  | -1.77193000 |

|   |             |             |             |
|---|-------------|-------------|-------------|
| C | -1.95412800 | 1.73617000  | -1.25351000 |
| H | -1.45672300 | 1.38883800  | -2.18337300 |
| H | -2.36791000 | 2.75051400  | -1.46526500 |
| C | 1.40854000  | -2.48009300 | 1.02523900  |
| H | 0.64119700  | -2.46113800 | 1.82207500  |
| H | 2.29171600  | -1.92850200 | 1.39043000  |
| H | 1.70301700  | -3.53874600 | 0.84117500  |
| C | 2.61310300  | 0.99272900  | 1.62386200  |
| H | 3.50044500  | 1.66773400  | 1.65126000  |
| H | 2.96625600  | -0.04392700 | 1.77323000  |
| H | 1.94084000  | 1.25690400  | 2.46396500  |
| C | -2.61311800 | -0.99271500 | 1.62386100  |
| H | -3.50044600 | -1.66773700 | 1.65126400  |
| H | -2.96629000 | 0.04393800  | 1.77320900  |
| H | -1.94086300 | -1.25685600 | 2.46398400  |

<sup>2</sup>TS1, L=13-TMC

BP86/BS1 SCF energy in solution: -2265.95807021 a.u.

BP86/BS2 SCF energy in solution: -2267.22302748 a.u.

BP86/BS2 Free energy in solution: -2266.81207448 a.u.

2 2

|   |             |             |             |
|---|-------------|-------------|-------------|
| N | -0.14655600 | 1.87595100  | 0.56367800  |
| N | 2.12018000  | 0.09604600  | 0.01382900  |
| N | 0.22254600  | -1.63880300 | 1.03485100  |
| C | -2.19108500 | -1.66901500 | 0.62016800  |
| H | -2.27825800 | -2.64496000 | 0.10684900  |
| H | -3.18177500 | -1.45457500 | 1.07007300  |
| C | -1.22814000 | 1.77839400  | 1.57421400  |
| H | -1.30174300 | 2.74100500  | 2.13299000  |
| H | -0.89602800 | 1.01787200  | 2.30664000  |
| C | 1.30885900  | -1.25554900 | 1.97947800  |
| H | 1.58131900  | -2.11259500 | 2.63543300  |
| H | 0.91269300  | -0.45105600 | 2.62774200  |
| C | 1.17685200  | 2.06171600  | 1.22808400  |
| H | 1.16420700  | 1.52129000  | 2.19361700  |
| H | 1.34726200  | 3.13634300  | 1.46342500  |
| C | 2.51864700  | -0.79657800 | 1.17677000  |
| H | 3.24437500  | -0.26652500 | 1.82767700  |
| H | 3.04719200  | -1.67097900 | 0.75292500  |
| C | -1.11361800 | -1.73254400 | 1.69188500  |
| H | -1.19597000 | -0.89243000 | 2.40631600  |
| H | -1.19932400 | -2.67625700 | 2.27506400  |
| C | -0.38839300 | 3.01288700  | -0.35859500 |
| H | -1.34611800 | 2.89850500  | -0.89760500 |

|    |             |             |             |
|----|-------------|-------------|-------------|
| H  | 0.42994500  | 3.08918300  | -1.09869300 |
| H  | -0.43278200 | 3.96469000  | 0.21845700  |
| C  | 0.55609400  | -2.90089200 | 0.31174500  |
| H  | 0.64247700  | -3.73357600 | 1.04366900  |
| H  | 1.51348800  | -2.79837100 | -0.22956300 |
| H  | -0.23101000 | -3.14964000 | -0.42245400 |
| C  | 2.97512900  | -0.23686700 | -1.15736600 |
| H  | 4.04788600  | -0.10469700 | -0.89669900 |
| H  | 2.73279100  | 0.43990400  | -1.99603000 |
| H  | 2.80598400  | -1.28759900 | -1.45947600 |
| C  | 2.29061800  | 1.55116000  | 0.33287100  |
| H  | 2.29189300  | 2.10022700  | -0.62923100 |
| H  | 3.28192400  | 1.71595700  | 0.80859700  |
| C  | -2.70713900 | 0.60802000  | -0.28914100 |
| H  | -3.77027300 | 0.30740900  | -0.42926000 |
| H  | -2.46211400 | 1.24854300  | -1.15961400 |
| C  | -2.61708200 | 1.40989900  | 1.01479900  |
| H  | -3.16384200 | 0.88112700  | 1.82331600  |
| H  | -3.20404700 | 2.33128300  | 0.81681300  |
| C  | -2.17679700 | -1.21412200 | -1.77349500 |
| H  | -3.23694300 | -1.54681800 | -1.80369400 |
| H  | -1.51833500 | -2.08138900 | -1.96275700 |
| H  | -2.02734600 | -0.46583800 | -2.57271600 |
| N  | -1.86770300 | -0.62603700 | -0.43699900 |
| Co | 0.12352100  | -0.17020800 | -0.32711800 |
| O  | 0.27897000  | 0.66806200  | -2.00183300 |
| H  | -0.54390100 | 1.06464800  | -2.37576400 |
| O  | 0.41910100  | -0.42808600 | -3.30932700 |
| H  | 1.30379800  | -0.09401600 | -3.59060300 |

<sup>2</sup>TS1, L=14-TMC

BP86/BS1 SCF energy in solution: -2305.25199297 a.u.

BP86/BS2 SCF energy in solution: -2306.56421462 a.u.

BP86/BS2 Free energy in solution: -2306.12733862 a.u.

2 2

|   |             |             |             |
|---|-------------|-------------|-------------|
| N | -1.11352400 | 1.79154100  | -0.15948300 |
| N | 1.08636300  | -1.62407800 | -0.61409200 |
| N | 1.68407300  | 1.28071500  | 0.15841400  |
| N | -1.70658100 | -1.23030600 | -0.05556600 |
| C | -2.57790800 | -0.85768700 | -1.21544500 |
| H | -3.41785200 | -1.58751900 | -1.25126600 |
| H | -1.98560400 | -0.99383300 | -2.14289400 |
| C | 1.13785900  | 2.67359700  | 0.29318200  |
| H | 1.91458300  | 3.41251400  | 0.00025900  |

|    |             |             |             |
|----|-------------|-------------|-------------|
| H  | 0.91416800  | 2.84856500  | 1.36427900  |
| C  | -3.12483600 | 0.56425200  | -1.17813600 |
| H  | -3.76820000 | 0.73964400  | -0.29181300 |
| H  | -3.79714800 | 0.67055500  | -2.05516100 |
| C  | 2.04395400  | -1.27917700 | -1.71475500 |
| H  | 1.42783000  | -0.95967300 | -2.58007200 |
| H  | 2.56305000  | -2.21863700 | -2.01220600 |
| C  | -1.14528800 | -2.60108900 | -0.29248500 |
| H  | -1.93239100 | -3.25874000 | -0.72093300 |
| H  | -0.86217200 | -3.02783900 | 0.68840200  |
| C  | 3.06409200  | -0.19268500 | -1.40625300 |
| H  | 3.76942300  | -0.49713200 | -0.60598800 |
| H  | 3.68843000  | -0.08148500 | -2.31742500 |
| C  | 0.04344500  | -2.51757200 | -1.21169300 |
| H  | 0.47428800  | -3.52602400 | -1.39859800 |
| H  | -0.24274700 | -2.09771100 | -2.19576800 |
| C  | -1.83434300 | 2.25203100  | 1.05895300  |
| H  | -1.11068900 | 2.54374800  | 1.84196300  |
| H  | -2.48292900 | 1.45889400  | 1.46520000  |
| H  | -2.45610200 | 3.13740700  | 0.80440100  |
| C  | 2.45175400  | 1.17582100  | -1.12771900 |
| H  | 3.25472400  | 1.94646900  | -1.09524600 |
| H  | 1.76423100  | 1.45055700  | -1.95353400 |
| C  | -0.10062900 | 2.82904900  | -0.55030700 |
| H  | -0.53782800 | 3.84395800  | -0.43122000 |
| H  | 0.12989200  | 2.69797500  | -1.62500300 |
| C  | -2.05333600 | 1.63513000  | -1.32107800 |
| H  | -1.42685300 | 1.41034000  | -2.20994900 |
| H  | -2.52552100 | 2.62876300  | -1.49310700 |
| C  | 1.76948200  | -2.33743700 | 0.49903800  |
| H  | 1.08040500  | -2.45977200 | 1.35538200  |
| H  | 2.64677500  | -1.76436500 | 0.84493200  |
| H  | 2.12017500  | -3.33214700 | 0.14859700  |
| C  | 2.60159400  | 1.06246100  | 1.31175600  |
| H  | 3.43539800  | 1.79547400  | 1.25440400  |
| H  | 3.02931100  | 0.04723400  | 1.31192400  |
| H  | 2.07688700  | 1.22882200  | 2.27057800  |
| C  | -2.52268100 | -1.30757200 | 1.18720300  |
| H  | -3.31006600 | -2.08067300 | 1.04884300  |
| H  | -3.01732900 | -0.34541700 | 1.40176800  |
| H  | -1.87404000 | -1.57809900 | 2.03755000  |
| Co | -0.01020200 | 0.04254100  | 0.01919400  |
| O  | -0.14763200 | -0.09739200 | 1.87107400  |
| H  | 0.27149300  | 0.64814900  | 2.35928100  |

|   |            |             |            |
|---|------------|-------------|------------|
| O | 0.27911100 | -1.23848900 | 3.29080500 |
| H | 1.23875900 | -1.28141300 | 3.07064200 |

<sup>2</sup>IM2, L=13-TMC

BP86/BS1 SCF energy in solution: -2189.6230483 a.u.

BP86/BS2 SCF energy in solution: -2190.78708194 a.u.

BP86/BS2 Free energy in solution: -2190.39599394 a.u.

2 2

|    |             |             |             |
|----|-------------|-------------|-------------|
| Co | -0.10709400 | -0.10241200 | 0.54483500  |
| N  | 0.08706500  | 1.80928000  | -0.47636800 |
| N  | -2.14182800 | 0.09542000  | 0.29632900  |
| N  | -0.29885700 | -1.68838300 | -0.76382400 |
| C  | 2.13150300  | -1.70194200 | -0.46083500 |
| H  | 2.23436700  | -2.64766700 | 0.10251300  |
| H  | 3.10048800  | -1.52071800 | -0.96851100 |
| C  | 1.11623200  | 1.67633500  | -1.54025200 |
| H  | 1.13815600  | 2.62543000  | -2.12306500 |
| H  | 0.74596100  | 0.89516400  | -2.23155500 |
| C  | -1.44238800 | -1.35130700 | -1.65400400 |
| H  | -1.75662500 | -2.23746900 | -2.24908800 |
| H  | -1.09229900 | -0.57820900 | -2.36367700 |
| C  | -1.27626100 | 1.99290400  | -1.06430900 |
| H  | -1.32581300 | 1.42704000  | -2.01328200 |
| H  | -1.43234700 | 3.06481500  | -1.31431400 |
| C  | -2.60205200 | -0.85782200 | -0.79495700 |
| H  | -3.36872300 | -0.35813700 | -1.42143100 |
| H  | -3.09834800 | -1.70970300 | -0.29423300 |
| C  | 1.00323600  | -1.81115900 | -1.47850700 |
| H  | 1.05128400  | -1.00660000 | -2.23602400 |
| H  | 1.06568600  | -2.78124600 | -2.01929600 |
| C  | 0.39606100  | 2.94605400  | 0.43215000  |
| H  | 1.34539300  | 2.78459000  | 0.96871900  |
| H  | -0.40806000 | 3.07301700  | 1.17702100  |
| H  | 0.48106400  | 3.87055200  | -0.18062000 |
| C  | -0.58408400 | -2.90764200 | 0.04353800  |
| H  | -0.71051300 | -3.77810200 | -0.63643800 |
| H  | -1.50875900 | -2.77924200 | 0.63280600  |
| H  | 0.24347200  | -3.11921600 | 0.74351300  |
| C  | -2.87932200 | -0.19120100 | 1.55672300  |
| H  | -3.97100600 | -0.06770800 | 1.38926100  |
| H  | -2.54443500 | 0.50950700  | 2.34303900  |
| H  | -2.67624600 | -1.22910100 | 1.88131700  |
| C  | -2.33796500 | 1.53213300  | -0.08280800 |
| H  | -2.29312100 | 2.13112900  | 0.84739700  |

|   |             |             |             |
|---|-------------|-------------|-------------|
| H | -3.35128700 | 1.66742500  | -0.51749000 |
| O | -0.10836200 | 0.63936300  | 2.03552000  |
| C | 2.70981200  | 0.62032400  | 0.29365900  |
| H | 3.77568100  | 0.31339000  | 0.38471800  |
| H | 2.51025100  | 1.30425800  | 1.13989700  |
| C | 2.53885600  | 1.34344500  | -1.04680800 |
| H | 3.03517500  | 0.77085100  | -1.85733300 |
| H | 3.12853100  | 2.27726000  | -0.93887500 |
| C | 2.20949900  | -1.10471300 | 1.91814800  |
| H | 3.26272900  | -1.45790500 | 1.93468000  |
| H | 1.53901500  | -1.94399200 | 2.18143800  |
| H | 2.08229900  | -0.29001100 | 2.65365600  |
| N | 1.87615100  | -0.59798000 | 0.55245300  |

<sup>4</sup>IM2, L=13-TMC

BP86/BS1 SCF energy in solution: -2189.6368764 a.u.

BP86/BS2 SCF energy in solution: -2190.80083368 a.u.

BP86/BS2 Free energy in solution: -2190.41100368 a.u.

2 4

|    |             |             |             |
|----|-------------|-------------|-------------|
| Co | -0.10112600 | -0.13458300 | 0.52933400  |
| N  | 0.04468200  | 1.92156300  | -0.45268800 |
| N  | -2.13966800 | 0.06418100  | 0.30206900  |
| N  | -0.28013200 | -1.72904500 | -0.76334700 |
| C  | 2.16501200  | -1.67846000 | -0.49579700 |
| H  | 2.29943700  | -2.62792400 | 0.05488300  |
| H  | 3.11933600  | -1.46904700 | -1.02035100 |
| C  | 1.06038800  | 1.74448200  | -1.51836500 |
| H  | 1.09439000  | 2.66306200  | -2.15019000 |
| H  | 0.68126100  | 0.93533000  | -2.17210600 |
| C  | -1.42557700 | -1.36734000 | -1.64845200 |
| H  | -1.73290900 | -2.24200100 | -2.26383600 |
| H  | -1.07363100 | -0.57858700 | -2.33999700 |
| C  | -1.32885100 | 2.04166900  | -1.01578400 |
| H  | -1.36304500 | 1.49045000  | -1.97483000 |
| H  | -1.55783500 | 3.10587300  | -1.24615600 |
| C  | -2.59185200 | -0.88514000 | -0.79506200 |
| H  | -3.35455700 | -0.38548300 | -1.42638700 |
| H  | -3.08840400 | -1.74123700 | -0.30127200 |
| C  | 1.02141100  | -1.80267900 | -1.49374800 |
| H  | 1.03612200  | -0.98333300 | -2.23647300 |
| H  | 1.09745600  | -2.76163000 | -2.05201500 |
| C  | 0.34297800  | 3.05132500  | 0.44938500  |
| H  | 1.31978000  | 2.92211300  | 0.94705000  |
| H  | -0.43372600 | 3.13180500  | 1.23163200  |

|   |             |             |             |
|---|-------------|-------------|-------------|
| H | 0.36484200  | 3.99854100  | -0.13629600 |
| C | -0.54356500 | -2.96642300 | 0.01818400  |
| H | -0.64178500 | -3.82765300 | -0.67780900 |
| H | -1.47677400 | -2.86767700 | 0.60028600  |
| H | 0.28607900  | -3.16341300 | 0.72096200  |
| C | -2.84726500 | -0.26409300 | 1.56991100  |
| H | -3.94411500 | -0.16285200 | 1.42254000  |
| H | -2.51599000 | 0.42849100  | 2.36454700  |
| H | -2.61467500 | -1.30347500 | 1.86965300  |
| C | -2.36642800 | 1.50685000  | -0.03983900 |
| H | -2.33318200 | 2.07680900  | 0.90906800  |
| H | -3.38694800 | 1.62515900  | -0.46327000 |
| O | -0.07052500 | 0.54761900  | 2.03339000  |
| C | 2.68345000  | 0.66403400  | 0.28876800  |
| H | 3.76107800  | 0.39846800  | 0.37473400  |
| H | 2.45340100  | 1.32089700  | 1.14903500  |
| C | 2.48728000  | 1.41514300  | -1.03366300 |
| H | 2.98924700  | 0.87150900  | -1.86126200 |
| H | 3.06700600  | 2.35317700  | -0.90447600 |
| C | 2.26068100  | -1.10778600 | 1.88598100  |
| H | 3.32825400  | -1.41560300 | 1.89241400  |
| H | 1.62826300  | -1.98092900 | 2.13517500  |
| H | 2.10161000  | -0.31372200 | 2.63768200  |
| N | 1.90064000  | -0.59295700 | 0.53236800  |

<sup>2</sup>IM2, L=14-TMC

BP86/BS1 SCF energy in solution: -2228.91585272 a.u.

BP86/BS2 SCF energy in solution: -2230.12384917 a.u.

BP86/BS2 Free energy in solution: -2229.70581217 a.u.

2 2

|    |             |             |             |
|----|-------------|-------------|-------------|
| Co | 0.00451300  | 0.00197600  | 0.21155700  |
| N  | 1.05494800  | -1.75456300 | -0.19850000 |
| N  | -1.05683300 | 1.75255300  | -0.19779300 |
| N  | -1.74007400 | -1.20989800 | 0.22976400  |
| N  | 1.73850700  | 1.21080900  | 0.22974100  |
| O  | -0.00082300 | -0.00373900 | 1.89670200  |
| C  | 2.51438400  | 0.95516800  | -1.02674100 |
| H  | 3.35550200  | 1.68386800  | -1.05131800 |
| H  | 1.85246900  | 1.18517500  | -1.88655200 |
| C  | -1.20864000 | -2.61112300 | 0.23602100  |
| H  | -2.00604700 | -3.30997800 | -0.09747800 |
| H  | -0.96249700 | -2.87180800 | 1.28308100  |
| C  | 3.05406100  | -0.46468600 | -1.17063900 |
| H  | 3.75117000  | -0.72900900 | -0.34993000 |

|   |             |             |             |
|---|-------------|-------------|-------------|
| H | 3.67121800  | -0.47753100 | -2.09323700 |
| C | -1.98059900 | 1.52299000  | -1.35938100 |
| H | -1.33841200 | 1.24420200  | -2.22043500 |
| H | -2.44790700 | 2.50417700  | -1.60199800 |
| C | 1.20693100  | 2.61270500  | 0.23411300  |
| H | 2.00388900  | 3.31058500  | -0.10221000 |
| H | 0.96247100  | 2.87510500  | 1.28107300  |
| C | -3.05638100 | 0.46359200  | -1.17076600 |
| H | -3.75446700 | 0.72831000  | -0.35096400 |
| H | -3.67260100 | 0.47646800  | -2.09401200 |
| C | -0.00653800 | 2.72346500  | -0.64996900 |
| H | -0.41931700 | 3.75503100  | -0.62815900 |
| H | 0.24489600  | 2.49407700  | -1.70351400 |
| C | 1.76267000  | -2.31609600 | 0.98296700  |
| H | 1.03065700  | -2.55953400 | 1.77304900  |
| H | 2.48212100  | -1.59453200 | 1.40061800  |
| H | 2.30411700  | -3.23838200 | 0.68160100  |
| C | -2.51636000 | -0.95598600 | -1.02601500 |
| H | -3.35763100 | -1.68467200 | -1.05008000 |
| H | -1.85504000 | -1.18643800 | -1.88614200 |
| C | 0.00366400  | -2.72444200 | -0.64940700 |
| H | 0.41506700  | -3.75658500 | -0.62693900 |
| H | -0.24833500 | -2.49563600 | -1.70292100 |
| C | 1.97831700  | -1.52427100 | -1.36023900 |
| H | 1.33595700  | -1.24473500 | -2.22097100 |
| H | 2.44572500  | -2.50512100 | -1.60373200 |
| C | -1.76356600 | 2.31283700  | 0.98477400  |
| H | -1.03085500 | 2.55539300  | 1.77453200  |
| H | -2.48268700 | 1.59065500  | 1.40183800  |
| H | -2.30502200 | 3.23559600  | 0.68481000  |
| C | -2.60919500 | -1.08310400 | 1.42889400  |
| H | -3.32526000 | -1.93272200 | 1.44499200  |
| H | -3.19367900 | -0.14876300 | 1.41157300  |
| H | -1.97091300 | -1.09860000 | 2.32992500  |
| C | 2.60966600  | 1.08665000  | 1.42834500  |
| H | 3.33992200  | 1.92427600  | 1.42769200  |
| H | 3.17771800  | 0.14215400  | 1.42431900  |
| H | 1.97617900  | 1.12703100  | 2.33161400  |

<sup>4</sup>IM2, L=14-TMC

BP86/BS1 SCF energy in solution: -2228.92568485 a.u.

BP86/BS2 SCF energy in solution: -2230.1336822 a.u.

BP86/BS2 Free energy in solution: -2229.7166012 a.u.

2 4



|    |             |             |             |
|----|-------------|-------------|-------------|
| Co | 0.00002700  | -0.00003600 | 0.34580300  |
| N  | 1.22946800  | -1.69634100 | -0.30002500 |
| N  | -1.22942000 | 1.69632600  | -0.30005700 |
| N  | -1.60203300 | -1.35494700 | 0.27777300  |
| N  | 1.60200100  | 1.35492900  | 0.27781500  |
| O  | -0.00006700 | 0.00010400  | 2.01152500  |
| C  | 2.38540500  | 1.14798900  | -0.99047500 |
| H  | 3.14668600  | 1.95935300  | -1.01837200 |
| H  | 1.69453200  | 1.32051000  | -1.83955800 |
| C  | -0.94777800 | -2.70704000 | 0.22862000  |
| H  | -1.70406700 | -3.46251200 | -0.07518900 |
| H  | -0.62750900 | -2.95938600 | 1.25796600  |
| C  | 3.07522200  | -0.19953000 | -1.17690700 |
| H  | 3.77879700  | -0.42333900 | -0.34944500 |
| H  | 3.71124700  | -0.09411500 | -2.08052800 |
| C  | -2.12612700 | 1.36427400  | -1.44145200 |
| H  | -1.47725700 | 1.12412100  | -2.30895100 |
| H  | -2.70915600 | 2.27717100  | -1.70429500 |
| C  | 0.94774700  | 2.70702300  | 0.22877800  |
| H  | 1.70407200  | 3.46250300  | -0.07491300 |
| H  | 0.62739700  | 2.95927700  | 1.25811500  |
| C  | -3.07525200 | 0.19967200  | -1.17685800 |
| H  | -3.77878800 | 0.42355800  | -0.34937600 |
| H  | -3.71131900 | 0.09428200  | -2.08045200 |
| C  | -0.22611100 | 2.71438900  | -0.72418900 |
| H  | -0.69116300 | 3.72506500  | -0.74779000 |
| H  | 0.08981600  | 2.48076100  | -1.75932700 |
| C  | 2.00554700  | -2.22941700 | 0.85069700  |
| H  | 1.32913700  | -2.48886400 | 1.68383600  |
| H  | 2.73049700  | -1.48685000 | 1.22162400  |
| H  | 2.56091000  | -3.13942200 | 0.53262700  |
| C  | -2.38555800 | -1.14790400 | -0.99043700 |
| H  | -3.14695500 | -1.95916300 | -1.01825400 |
| H  | -1.69481000 | -1.32052600 | -1.83959500 |
| C  | 0.22614500  | -2.71434100 | -0.72426800 |
| H  | 0.69119400  | -3.72501900 | -0.74794800 |
| H  | -0.08969100 | -2.48060500 | -1.75940700 |
| C  | 2.12615300  | -1.36420700 | -1.44142700 |
| H  | 1.47724800  | -1.12406400 | -2.30890200 |
| H  | 2.70921100  | -2.27707000 | -1.70432800 |
| C  | -2.00555200 | 2.22925000  | 0.85071300  |
| H  | -1.32921000 | 2.48836000  | 1.68400700  |
| H  | -2.73068100 | 1.48670600  | 1.22133400  |
| H  | -2.56073600 | 3.13941600  | 0.53279300  |

|   |             |             |            |
|---|-------------|-------------|------------|
| C | -2.48616800 | -1.32450900 | 1.47171200 |
| H | -3.21904400 | -2.15656800 | 1.39750900 |
| H | -3.04052800 | -0.37396100 | 1.54139300 |
| H | -1.87174700 | -1.45151000 | 2.38124100 |
| C | 2.48629000  | 1.32442800  | 1.47164200 |
| H | 3.21922700  | 2.15642800  | 1.39733900 |
| H | 3.04059800  | 0.37384600  | 1.54126600 |
| H | 1.87201800  | 1.45151300  | 2.38125700 |

<sup>CS</sup>IM4, L=13-TMC

BP86/BS1 SCF energy in solution: -2190.27170009 a.u.

BP86/BS2 SCF energy in solution: -2191.43808356 a.u.

BP86/BS2 Free energy in solution: -2191.03343056 a.u.

2 1

|    |             |             |             |
|----|-------------|-------------|-------------|
| Co | -0.11561400 | -0.10098300 | 0.52229000  |
| N  | 0.04381300  | 1.70380600  | -0.53402000 |
| N  | -2.14914900 | 0.05603500  | 0.28383300  |
| N  | -0.24962500 | -1.66087300 | -0.76037400 |
| C  | 2.16700100  | -1.65422300 | -0.42408700 |
| H  | 2.26232300  | -2.58917900 | 0.15810700  |
| H  | 3.14617000  | -1.48391400 | -0.91625000 |
| C  | 1.07680800  | 1.61933000  | -1.60258400 |
| H  | 1.05772100  | 2.57736000  | -2.16942400 |
| H  | 0.73727900  | 0.84005200  | -2.30902300 |
| C  | -1.40274300 | -1.38011200 | -1.65615400 |
| H  | -1.68558500 | -2.29116200 | -2.22933100 |
| H  | -1.07973200 | -0.61705800 | -2.38786600 |
| C  | -1.32011800 | 1.89358200  | -1.13302800 |
| H  | -1.38582200 | 1.30125200  | -2.06451600 |
| H  | -1.45227000 | 2.95992100  | -1.41519200 |
| C  | -2.57929700 | -0.91386300 | -0.80269600 |
| H  | -3.35901100 | -0.44313100 | -1.43624500 |
| H  | -3.05425800 | -1.77787800 | -0.30197300 |
| C  | 1.05853300  | -1.79017900 | -1.45896200 |
| H  | 1.11159200  | -1.00742400 | -2.23734200 |
| H  | 1.13410100  | -2.77306100 | -1.97459400 |
| C  | 0.32594300  | 2.87642500  | 0.35100000  |
| H  | 1.31328500  | 2.78847400  | 0.83174700  |
| H  | -0.44180200 | 2.95843000  | 1.13777200  |
| H  | 0.32394300  | 3.79291700  | -0.27780600 |
| C  | -0.51734200 | -2.87450900 | 0.06892900  |
| H  | -0.63092300 | -3.75677900 | -0.59728300 |
| H  | -1.44248300 | -2.75151100 | 0.65863400  |
| H  | 0.31293600  | -3.06141300 | 0.77265700  |

|   |             |             |             |
|---|-------------|-------------|-------------|
| C | -2.89635700 | -0.21688600 | 1.53764600  |
| H | -3.98650600 | -0.08012900 | 1.36844600  |
| H | -2.54592000 | 0.48051200  | 2.31904400  |
| H | -2.70917100 | -1.25703900 | 1.86570800  |
| C | -2.37250500 | 1.47443700  | -0.12770100 |
| H | -2.31659500 | 2.10053100  | 0.78348900  |
| H | -3.39177600 | 1.59257400  | -0.55441400 |
| O | -0.23098900 | 0.69158100  | 2.15779700  |
| C | 2.71575100  | 0.67846200  | 0.25585500  |
| H | 3.78657500  | 0.38701300  | 0.34120100  |
| H | 2.53083400  | 1.39737900  | 1.07670700  |
| C | 2.51367000  | 1.33930600  | -1.11278800 |
| H | 3.01256100  | 0.73828800  | -1.90089700 |
| H | 3.08447800  | 2.28908200  | -1.05921500 |
| C | 2.26109100  | -1.00938100 | 1.93030500  |
| H | 3.31009900  | -1.37590100 | 1.92551800  |
| H | 1.58950200  | -1.83446400 | 2.23522400  |
| H | 2.18640700  | -0.18450200 | 2.66258800  |
| N | 1.88980800  | -0.53009700 | 0.56545700  |
| H | 0.62500500  | 1.03822500  | 2.49164300  |

<sup>3</sup>IM4, L=13-TMC

BP86/BS1 SCF energy in solution: -2190.27568355 a.u.

BP86/BS2 SCF energy in solution: -2191.44113277 a.u.

BP86/BS2 Free energy in solution: -2191.04106877 a.u.

2 3

|    |             |             |             |
|----|-------------|-------------|-------------|
| Co | -0.10923500 | -0.14371400 | 0.48447900  |
| N  | 0.05177000  | 1.89184800  | -0.49349000 |
| N  | -2.13568200 | 0.06051300  | 0.28566500  |
| N  | -0.27339900 | -1.73850200 | -0.75666400 |
| C  | 2.16079000  | -1.68361600 | -0.46311100 |
| H  | 2.27471700  | -2.62422500 | 0.10714900  |
| H  | 3.12745000  | -1.49697900 | -0.97400000 |
| C  | 1.06138300  | 1.72361500  | -1.56658800 |
| H  | 1.09842400  | 2.64670700  | -2.19153300 |
| H  | 0.67730200  | 0.92043900  | -2.22504800 |
| C  | -1.41567100 | -1.38635500 | -1.65102400 |
| H  | -1.71973400 | -2.26891400 | -2.25666700 |
| H  | -1.05891300 | -0.60747700 | -2.35137600 |
| C  | -1.32497800 | 2.01911500  | -1.05269800 |
| H  | -1.36818800 | 1.45693700  | -2.00549200 |
| H  | -1.54513500 | 3.08259000  | -1.29568700 |
| C  | -2.58631200 | -0.88967300 | -0.80985000 |
| H  | -3.34042700 | -0.39196300 | -1.45351800 |

|   |             |             |             |
|---|-------------|-------------|-------------|
| H | -3.09380700 | -1.74038700 | -0.31747300 |
| C | 1.03321500  | -1.81950000 | -1.47496800 |
| H | 1.05348500  | -1.00802800 | -2.22620800 |
| H | 1.11721100  | -2.78462500 | -2.02151100 |
| C | 0.35250600  | 3.02969000  | 0.39881600  |
| H | 1.36286700  | 2.93877800  | 0.83443900  |
| H | -0.37884200 | 3.06828800  | 1.22634500  |
| H | 0.30581600  | 3.98059900  | -0.17937700 |
| C | -0.54279600 | -2.96600400 | 0.03655000  |
| H | -0.62948900 | -3.83759000 | -0.64788600 |
| H | -1.48347100 | -2.86091400 | 0.60549500  |
| H | 0.27816800  | -3.14856700 | 0.75334500  |
| C | -2.86234200 | -0.24951500 | 1.54492100  |
| H | -3.95402300 | -0.10108000 | 1.39686000  |
| H | -2.49842400 | 0.41863500  | 2.34490600  |
| H | -2.67569200 | -1.30105800 | 1.83500300  |
| C | -2.35987800 | 1.50075500  | -0.06626300 |
| H | -2.31490600 | 2.07803800  | 0.87756900  |
| H | -3.38307200 | 1.62439500  | -0.48304200 |
| O | -0.20216000 | 0.60425000  | 2.12935200  |
| C | 2.68570500  | 0.66559000  | 0.25717800  |
| H | 3.76227400  | 0.39529700  | 0.34307600  |
| H | 2.47527300  | 1.35598500  | 1.09678200  |
| C | 2.48837600  | 1.37954200  | -1.08651800 |
| H | 2.97214500  | 0.79979800  | -1.90040300 |
| H | 3.08847500  | 2.30897200  | -0.99342400 |
| C | 2.28241900  | -1.07759700 | 1.89117400  |
| H | 3.33577600  | -1.43025400 | 1.86429600  |
| H | 1.62550900  | -1.91807500 | 2.18634600  |
| H | 2.21898900  | -0.27309300 | 2.64832600  |
| N | 1.88867100  | -0.57460100 | 0.54145500  |
| H | 0.68283600  | 0.81297100  | 2.50247900  |

<sup>CS</sup>IM4, L=14-TMC

BP86/BS1 SCF energy in solution: -2229.56359841 a.u.

BP86/BS2 SCF energy in solution: -2230.77431035 a.u.

BP86/BS2 Free energy in solution: -2230.34747235 a.u.

2 1

|    |             |             |             |
|----|-------------|-------------|-------------|
| Co | 0.00380100  | -0.00315700 | 0.16267100  |
| N  | 1.09552400  | -1.73444300 | -0.20217100 |
| N  | -1.10249500 | 1.73057100  | -0.18459300 |
| N  | -1.70980800 | -1.23385500 | 0.20458600  |
| N  | 1.69881700  | 1.24992800  | 0.20147500  |
| O  | -0.03954000 | -0.03927100 | 1.99550800  |

|   |             |             |             |
|---|-------------|-------------|-------------|
| C | 2.47241000  | 1.00734300  | -1.05999400 |
| H | 3.28514900  | 1.76686100  | -1.10727400 |
| H | 1.79067500  | 1.19494600  | -1.91520400 |
| C | -1.15626600 | -2.62587900 | 0.21480300  |
| H | -1.93911400 | -3.34175600 | -0.11771300 |
| H | -0.90525900 | -2.87809500 | 1.26283300  |
| C | 3.06081600  | -0.39526100 | -1.18247800 |
| H | 3.76264000  | -0.62346100 | -0.35484900 |
| H | 3.68247000  | -0.40131000 | -2.10225000 |
| C | -2.03870200 | 1.49790700  | -1.33686300 |
| H | -1.40057500 | 1.24888100  | -2.21033800 |
| H | -2.53520000 | 2.46916800  | -1.56137300 |
| C | 1.14460600  | 2.64497000  | 0.20423700  |
| H | 1.92298100  | 3.35571700  | -0.14855900 |
| H | 0.90921900  | 2.90956400  | 1.25284400  |
| C | -3.08421800 | 0.40519600  | -1.16479800 |
| H | -3.78620700 | 0.63462700  | -0.33757300 |
| H | -3.70439900 | 0.41777300  | -2.08552000 |
| C | -0.08590600 | 2.72575900  | -0.65684700 |
| H | -0.51883100 | 3.74945500  | -0.63273800 |
| H | 0.15460600  | 2.49917500  | -1.71388300 |
| C | 1.81451800  | -2.30937600 | 0.96373800  |
| H | 1.10214100  | -2.51092200 | 1.78395300  |
| H | 2.58991700  | -1.61979900 | 1.33796200  |
| H | 2.30710100  | -3.25967700 | 0.66525200  |
| C | -2.50238800 | -1.00003100 | -1.04383300 |
| H | -3.32127800 | -1.75402800 | -1.07140200 |
| H | -1.83931000 | -1.19966000 | -1.91088000 |
| C | 0.06084600  | -2.71634400 | -0.66589200 |
| H | 0.48480900  | -3.74373100 | -0.65497300 |
| H | -0.19291000 | -2.47914900 | -1.71750400 |
| C | 2.02022200  | -1.49217000 | -1.36104200 |
| H | 1.37500300  | -1.23785600 | -2.22753800 |
| H | 2.51811500  | -2.45996300 | -1.59620100 |
| C | -1.80187500 | 2.27381400  | 1.00642700  |
| H | -1.06918100 | 2.47972300  | 1.80651600  |
| H | -2.53223900 | 1.55084900  | 1.40361600  |
| H | -2.33192700 | 3.21184400  | 0.73303800  |
| C | -2.58134600 | -1.12773300 | 1.40565000  |
| H | -3.29725500 | -1.97786200 | 1.40692200  |
| H | -3.16497100 | -0.19293200 | 1.40454900  |
| H | -1.94309700 | -1.15693100 | 2.30546600  |
| C | 2.60261000  | 1.17113400  | 1.38241600  |
| H | 3.40884900  | 1.92851000  | 1.27333100  |

|   |            |             |            |
|---|------------|-------------|------------|
| H | 3.07589100 | 0.18041000  | 1.48213100 |
| H | 2.02935700 | 1.39945400  | 2.29899500 |
| H | 0.87031800 | -0.20180000 | 2.32397500 |

<sup>3</sup>IM4, L=14-TMC

BP86/BS1 SCF energy in solution: -2229.56582586 a.u.

BP86/BS2 SCF energy in solution: -2230.77639243 a.u.

BP86/BS2 Free energy in solution: -2230.34850043 a.u.

2 3

|    |             |             |             |
|----|-------------|-------------|-------------|
| Co | -0.01251700 | 0.00853500  | 0.30407600  |
| N  | 1.11723400  | -1.73864400 | -0.32586000 |
| N  | -1.10722100 | 1.74280000  | -0.28384700 |
| N  | -1.68812000 | -1.24696900 | 0.24419700  |
| N  | 1.66484900  | 1.26525900  | 0.25736500  |
| O  | -0.00368800 | -0.20191600 | 2.12260300  |
| C  | 2.42402200  | 1.02662900  | -1.02167700 |
| H  | 3.22059600  | 1.80296600  | -1.06504600 |
| H  | 1.73042400  | 1.21890300  | -1.86422400 |
| C  | -1.11216700 | -2.63239500 | 0.18979900  |
| H  | -1.90655200 | -3.34590100 | -0.11954700 |
| H  | -0.80853700 | -2.90762500 | 1.21795000  |
| C  | 3.04722700  | -0.35323800 | -1.20464400 |
| H  | 3.73680300  | -0.60953800 | -0.37440500 |
| H  | 3.68899200  | -0.28610400 | -2.10794300 |
| C  | -2.03449300 | 1.48719000  | -1.42564600 |
| H  | -1.40417600 | 1.21418600  | -2.29723400 |
| H  | -2.54604200 | 2.44589100  | -1.67187800 |
| C  | 1.10707000  | 2.66013600  | 0.22259000  |
| H  | 1.90461300  | 3.36945200  | -0.08720200 |
| H  | 0.81153700  | 2.92916800  | 1.25546700  |
| C  | -3.06711400 | 0.39420700  | -1.17946600 |
| H  | -3.75080100 | 0.65595800  | -0.34618700 |
| H  | -3.71068400 | 0.35505900  | -2.08315000 |
| C  | -0.07562700 | 2.73541100  | -0.71149100 |
| H  | -0.50882500 | 3.75970100  | -0.70916500 |
| H  | 0.21350900  | 2.50793700  | -1.75538300 |
| C  | 1.85739800  | -2.32235600 | 0.82499800  |
| H  | 1.16760700  | -2.51064900 | 1.66584800  |
| H  | 2.64589200  | -1.63749500 | 1.17886000  |
| H  | 2.33505300  | -3.27630300 | 0.51022300  |
| C  | -2.47666300 | -1.00174600 | -1.01118600 |
| H  | -3.29480100 | -1.75626900 | -1.02998300 |
| H  | -1.81305400 | -1.21718000 | -1.87236700 |
| C  | 0.06192200  | -2.70033600 | -0.75819500 |

|   |             |             |             |
|---|-------------|-------------|-------------|
| H | 0.47386000  | -3.73361400 | -0.78716800 |
| H | -0.23769100 | -2.44282000 | -1.79268800 |
| C | 2.03642800  | -1.46406700 | -1.46544300 |
| H | 1.40424000  | -1.19082000 | -2.33563600 |
| H | 2.56527700  | -2.41073700 | -1.72290700 |
| C | -1.83955700 | 2.29280000  | 0.89087000  |
| H | -1.13708500 | 2.49627800  | 1.71828600  |
| H | -2.59987300 | 1.58380700  | 1.25408000  |
| H | -2.34532700 | 3.23897500  | 0.59825100  |
| C | -2.56944600 | -1.19160700 | 1.44058200  |
| H | -3.30279200 | -2.02498800 | 1.38809900  |
| H | -3.12842500 | -0.24197500 | 1.48637400  |
| H | -1.94694100 | -1.28781000 | 2.34688500  |
| C | 2.59164500  | 1.19531800  | 1.41896000  |
| H | 3.44421700  | 1.88739900  | 1.24790100  |
| H | 2.99277400  | 0.17855800  | 1.56573700  |
| H | 2.07210400  | 1.52949600  | 2.33717000  |
| H | 0.79051100  | 0.17818800  | 2.55682700  |

<sup>os</sup>IM5, L=13-TMC

BP86/BS1 SCF energy in solution: -2265.36195531 a.u.

BP86/BS2 SCF energy in solution: -2266.62111604 a.u.

BP86/BS2 Free energy in solution: -2266.21635304 a.u.

2 1

|    |             |             |             |
|----|-------------|-------------|-------------|
| Co | 0.11816800  | 0.03790100  | 0.43247400  |
| N  | -0.12245500 | -1.40213400 | -1.05938000 |
| N  | 2.16200800  | -0.27644500 | 0.24373300  |
| N  | 0.50143500  | 1.86071500  | -0.37919400 |
| C  | -1.93771000 | 2.01167600  | -0.26736900 |
| H  | -2.06578100 | 2.79042700  | 0.50749300  |
| H  | -2.85544500 | 2.02613400  | -0.88867900 |
| C  | -1.08309400 | -0.93446600 | -2.09733600 |
| H  | -1.08069400 | -1.68063500 | -2.92343700 |
| H  | -0.65854100 | -0.00542800 | -2.51978100 |
| C  | 1.69665300  | 1.69779200  | -1.25041900 |
| H  | 2.09920700  | 2.69042200  | -1.55296100 |
| H  | 1.37195900  | 1.17711900  | -2.17062500 |
| C  | 1.24514200  | -1.55882800 | -1.66055700 |
| H  | 1.39933500  | -0.74853900 | -2.39622100 |
| H  | 1.29500800  | -2.51800000 | -2.21910800 |
| C  | 2.75275300  | 0.92031000  | -0.47761900 |
| H  | 3.56826000  | 0.58645300  | -1.15207900 |
| H  | 3.21406000  | 1.57042200  | 0.28857500  |
| C  | -0.71108500 | 2.30746100  | -1.11809300 |

|   |             |             |             |
|---|-------------|-------------|-------------|
| H | -0.73685400 | 1.77096200  | -2.08383200 |
| H | -0.65359600 | 3.39445300  | -1.34845700 |
| C | -0.55344100 | -2.72942500 | -0.53388100 |
| H | -1.47443900 | -2.64784500 | 0.06482700  |
| H | 0.23929500  | -3.16757900 | 0.09675200  |
| H | -0.74261700 | -3.40204000 | -1.39737300 |
| C | 0.80001900  | 2.78536300  | 0.75398000  |
| H | 1.21008100  | 3.73764200  | 0.35330200  |
| H | 1.53823000  | 2.34061500  | 1.44668600  |
| H | -0.11767900 | 3.00890400  | 1.32474500  |
| C | 2.86008700  | -0.45510400 | 1.54346600  |
| H | 3.94409000  | -0.63233300 | 1.37187200  |
| H | 2.42531700  | -1.32008100 | 2.07546100  |
| H | 2.73554100  | 0.45516000  | 2.16012500  |
| C | 2.28766500  | -1.52906800 | -0.56235000 |
| H | 2.15462400  | -2.38455600 | 0.12797100  |
| H | 3.30976200  | -1.60743200 | -0.99143200 |
| O | 0.13407400  | -1.14195700 | 1.82324600  |
| C | -2.74781200 | -0.34817600 | -0.13662000 |
| H | -3.78956500 | 0.02660300  | -0.02347500 |
| H | -2.66632300 | -1.23686500 | 0.51679600  |
| C | -2.52672300 | -0.71973800 | -1.60842200 |
| H | -2.97620100 | 0.04879400  | -2.27076700 |
| H | -3.12303700 | -1.64089800 | -1.77194300 |
| C | -2.22655500 | 0.88167200  | 1.87925200  |
| H | -3.23746600 | 1.34152400  | 1.91982000  |
| H | -1.50426500 | 1.55804600  | 2.37407500  |
| H | -2.24629600 | -0.08674600 | 2.40579200  |
| N | -1.82920400 | 0.67284000  | 0.45246300  |
| O | -1.03444200 | -1.82014500 | 2.29858200  |
| H | -0.68144700 | -2.73285600 | 2.43689300  |

<sup>3</sup>IM5, L=13-TMC

BP86/BS1 SCF energy in solution: -2265.36315918 a.u.

BP86/BS2 SCF energy in solution: -2266.62140395 a.u.

BP86/BS2 Free energy in solution: -2266.21991595 a.u.

2 3

|    |             |             |             |
|----|-------------|-------------|-------------|
| Co | 0.13288900  | 0.10032400  | 0.40832800  |
| N  | -0.20413700 | -1.64397300 | -0.96530200 |
| N  | 2.14741200  | -0.31787300 | 0.26026000  |
| N  | 0.57534900  | 1.85071400  | -0.49851100 |
| C  | -1.86809500 | 2.06751600  | -0.44131300 |
| H  | -1.98693500 | 2.91773900  | 0.25599300  |
| H  | -2.77686100 | 2.04620200  | -1.07559500 |



|   |             |             |             |
|---|-------------|-------------|-------------|
| C | -1.13392900 | -1.17731700 | -2.02244600 |
| H | -1.22495300 | -1.96262400 | -2.80951800 |
| H | -0.64463100 | -0.30999000 | -2.50700500 |
| C | 1.74523000  | 1.54149200  | -1.37615100 |
| H | 2.17790200  | 2.48188300  | -1.78423100 |
| H | 1.36569100  | 0.94919300  | -2.22937000 |
| C | 1.17825300  | -1.81974400 | -1.50128800 |
| H | 1.33946600  | -1.07735100 | -2.30621800 |
| H | 1.28615000  | -2.82459800 | -1.96820700 |
| C | 2.78434000  | 0.77598100  | -0.57461700 |
| H | 3.55391800  | 0.34127000  | -1.24534300 |
| H | 3.30761300  | 1.45907600  | 0.12053500  |
| C | -0.62380700 | 2.24986800  | -1.29309800 |
| H | -0.64895900 | 1.60870800  | -2.19364000 |
| H | -0.52913300 | 3.30394300  | -1.63434500 |
| C | -0.66821500 | -2.90529200 | -0.34757200 |
| H | -1.66515900 | -2.78237100 | 0.10901700  |
| H | 0.03186500  | -3.22947100 | 0.44339200  |
| H | -0.72777700 | -3.69998100 | -1.12548200 |
| C | 0.91763900  | 2.86296900  | 0.53723400  |
| H | 1.29278000  | 3.78464900  | 0.04190600  |
| H | 1.69565100  | 2.47430100  | 1.21918100  |
| H | 0.02649400  | 3.11984800  | 1.13712700  |
| C | 2.83779600  | -0.38089300 | 1.57527000  |
| H | 3.91445000  | -0.61374600 | 1.42512600  |
| H | 2.37621900  | -1.16844800 | 2.19707200  |
| H | 2.74695700  | 0.59498000  | 2.08960200  |
| C | 2.21181200  | -1.66524000 | -0.39658200 |
| H | 2.04420700  | -2.42042200 | 0.39584200  |
| H | 3.23389400  | -1.83185600 | -0.80086700 |
| O | 0.09103500  | -0.91757400 | 1.91183800  |
| C | -2.71708800 | -0.27457800 | -0.09641400 |
| H | -3.75745200 | 0.10940600  | 0.00428400  |
| H | -2.61903000 | -1.10291000 | 0.63012600  |
| C | -2.54282800 | -0.78834000 | -1.53151600 |
| H | -2.94405200 | -0.04874400 | -2.25576700 |
| H | -3.22287500 | -1.66356500 | -1.59779600 |
| C | -2.20467300 | 1.15264000  | 1.79047400  |
| H | -3.21595800 | 1.61262800  | 1.77529100  |
| H | -1.48453400 | 1.87383500  | 2.22082500  |
| H | -2.23215400 | 0.24094500  | 2.41018900  |
| N | -1.79474800 | 0.79972200  | 0.39763400  |
| O | -1.08572000 | -1.57602900 | 2.38606000  |
| H | -0.90904600 | -1.59696000 | 3.35940200  |

<sup>OS</sup>IM5, L=14-TMC

BP86/BS1 SCF energy in solution: -2304.65475071 a.u.

BP86/BS2 SCF energy in solution: -2305.95891697 a.u.

BP86/BS2 Free energy in solution: -2305.52766697 a.u.

2 1

|    |             |             |             |
|----|-------------|-------------|-------------|
| Co | -0.01578200 | 0.02251700  | 0.07591200  |
| N  | 1.12094700  | -1.67893400 | -0.40742600 |
| N  | -1.15410600 | 1.73115800  | -0.21795000 |
| N  | -1.67684500 | -1.26583600 | 0.08782200  |
| N  | 1.66273300  | 1.29231900  | 0.12451800  |
| O  | -0.16840500 | 0.24803100  | 1.88855900  |
| C  | 2.41600000  | 1.17490600  | -1.16271900 |
| H  | 3.24124700  | 1.92225900  | -1.14286800 |
| H  | 1.73339100  | 1.46466500  | -1.98726200 |
| C  | -1.09394600 | -2.64752000 | 0.04812800  |
| H  | -1.86953000 | -3.37127100 | -0.28579600 |
| H  | -0.81154300 | -2.93143000 | 1.08068200  |
| C  | 2.97355000  | -0.21710300 | -1.44064200 |
| H  | 3.72320900  | -0.52570100 | -0.68374200 |
| H  | 3.53116900  | -0.15354800 | -2.39837900 |
| C  | -2.04711500 | 1.50011000  | -1.40358000 |
| H  | -1.37877900 | 1.27982100  | -2.26206200 |
| H  | -2.55931400 | 2.46331100  | -1.62626700 |
| C  | 1.07126800  | 2.66221800  | 0.24692400  |
| H  | 1.82988700  | 3.42524400  | -0.03332100 |
| H  | 0.81892500  | 2.82130300  | 1.31287500  |
| C  | -3.07006000 | 0.38071200  | -1.27091300 |
| H  | -3.79269000 | 0.57832900  | -0.45326100 |
| H  | -3.67339900 | 0.39503700  | -2.20274200 |
| C  | -0.15470700 | 2.77662200  | -0.61912200 |
| H  | -0.61024500 | 3.78644900  | -0.53341800 |
| H  | 0.09577500  | 2.62278100  | -1.68606500 |
| C  | 1.99607600  | -2.32746200 | 0.60317100  |
| H  | 1.38045600  | -2.78113400 | 1.39961000  |
| H  | 2.68145800  | -1.60536000 | 1.07437300  |
| H  | 2.59349000  | -3.12628500 | 0.11232600  |
| C  | -2.45798600 | -1.01349000 | -1.16853800 |
| H  | -3.25840400 | -1.78530900 | -1.22864200 |
| H  | -1.77664900 | -1.17321400 | -2.02873400 |
| C  | 0.10167900  | -2.68573100 | -0.86334300 |
| H  | 0.55179900  | -3.70100400 | -0.88293200 |
| H  | -0.18665500 | -2.44267500 | -1.90402500 |
| C  | 1.89991800  | -1.27948800 | -1.63261300 |

|   |             |             |             |
|---|-------------|-------------|-------------|
| H | 1.15651000  | -0.91514500 | -2.37342400 |
| H | 2.35182500  | -2.20642200 | -2.05212400 |
| C | -1.91736700 | 2.23360900  | 0.95293500  |
| H | -1.22538500 | 2.44447400  | 1.78754600  |
| H | -2.65444300 | 1.49324300  | 1.30230300  |
| H | -2.45251900 | 3.16615200  | 0.67254800  |
| C | -2.59030600 | -1.22937200 | 1.26156600  |
| H | -3.36956000 | -2.01205700 | 1.13455600  |
| H | -3.09213400 | -0.25520800 | 1.36648500  |
| H | -2.03428900 | -1.44026400 | 2.19154700  |
| C | 2.59400000  | 1.13472600  | 1.27391500  |
| H | 3.34422400  | 1.95456600  | 1.24334700  |
| H | 3.13485300  | 0.17638200  | 1.22680300  |
| H | 2.02843000  | 1.18909700  | 2.21882600  |
| O | 0.55559800  | -0.66508000 | 2.68816600  |
| H | -0.11767800 | -1.35603000 | 2.91804700  |

<sup>3</sup>IM5, L=14-TMC

BP86/BS1 SCF energy in solution: -2304.65297385 a.u.

BP86/BS2 SCF energy in solution: -2305.95586858 a.u.

BP86/BS2 Free energy in solution: -2305.52826158 a.u.

2 3

|    |             |             |             |
|----|-------------|-------------|-------------|
| Co | 0.00143300  | -0.01701300 | 0.18445700  |
| N  | 1.09878500  | -1.81895600 | -0.19211400 |
| N  | -1.10989700 | 1.66032800  | -0.56409600 |
| N  | -1.68636900 | -1.27477900 | 0.23444900  |
| N  | 1.68610300  | 1.18924700  | -0.04417300 |
| O  | -0.17869900 | 0.11949900  | 2.02094000  |
| C  | 2.39606800  | 0.82936100  | -1.32007700 |
| H  | 3.19652000  | 1.58811300  | -1.46862000 |
| H  | 1.67780100  | 0.93894400  | -2.15650700 |
| C  | -1.13209700 | -2.65853000 | 0.40280000  |
| H  | -1.92561400 | -3.40375700 | 0.17570600  |
| H  | -0.86319000 | -2.78381900 | 1.46977400  |
| C  | 3.00051700  | -0.56944700 | -1.36410600 |
| H  | 3.74958200  | -0.72294600 | -0.56065600 |
| H  | 3.57287600  | -0.63512300 | -2.31309600 |
| C  | -1.98673300 | 1.26833900  | -1.71170200 |
| H  | -1.31350700 | 0.93153400  | -2.52685700 |
| H  | -2.50663300 | 2.18601700  | -2.07098800 |
| C  | 1.13052500  | 2.57952700  | -0.15720700 |
| H  | 1.92549500  | 3.26292100  | -0.52795800 |
| H  | 0.85824600  | 2.90992300  | 0.86322700  |
| C  | -3.00782000 | 0.17600400  | -1.41751500 |

|   |             |             |             |
|---|-------------|-------------|-------------|
| H | -3.74547700 | 0.49636400  | -0.65346000 |
| H | -3.59530000 | 0.03540800  | -2.34890900 |
| C | -0.06532900 | 2.60150400  | -1.07413100 |
| H | -0.48009200 | 3.63038900  | -1.14846900 |
| H | 0.21054300  | 2.28953600  | -2.09956000 |
| C | 1.87860700  | -2.25731600 | 0.99815800  |
| H | 1.19953800  | -2.43712100 | 1.85124400  |
| H | 2.61432600  | -1.49556600 | 1.30259800  |
| H | 2.41973200  | -3.19925600 | 0.76005700  |
| C | -2.39945900 | -1.18225200 | -1.08352800 |
| H | -3.19902000 | -1.95703900 | -1.07514700 |
| H | -1.67863300 | -1.46304900 | -1.87728700 |
| C | 0.06418300  | -2.86123500 | -0.48911100 |
| H | 0.49596000  | -3.87527300 | -0.34338500 |
| H | -0.21390800 | -2.77972700 | -1.55710600 |
| C | 1.97042800  | -1.68907700 | -1.40327500 |
| H | 1.29066800  | -1.52719400 | -2.26519700 |
| H | 2.47835900  | -2.66812600 | -1.55993400 |
| C | -1.89030100 | 2.34491900  | 0.50094800  |
| H | -1.23670000 | 2.60125900  | 1.35416400  |
| H | -2.70327400 | 1.70220300  | 0.87686800  |
| H | -2.34161200 | 3.27366100  | 0.08858600  |
| C | -2.64009000 | -1.06376900 | 1.35659800  |
| H | -3.43077400 | -1.84356800 | 1.30811600  |
| H | -3.12020500 | -0.07392500 | 1.30130000  |
| H | -2.10010800 | -1.14438700 | 2.31547600  |
| C | 2.66905000  | 1.21261200  | 1.07654400  |
| H | 3.41875500  | 2.00855000  | 0.87654800  |
| H | 3.20565900  | 0.25400000  | 1.16228700  |
| H | 2.14545500  | 1.42842800  | 2.02296700  |
| O | 0.18822800  | 1.28933400  | 2.75810200  |
| H | 0.03396400  | 0.98659600  | 3.68669900  |

<sup>o</sup>TS3, L=13-TMC

BP86/BS1 SCF energy in solution: -2633.95476709 a.u.

BP86/BS2 SCF energy in solution: -2635.6532742 a.u.

BP86/BS2 Free energy in solution: -2635.0489892 a.u.

2 1

|   |             |             |             |
|---|-------------|-------------|-------------|
| N | -2.27723400 | 0.03828200  | 1.86354300  |
| N | -1.26105600 | -2.07983700 | 0.16000400  |
| N | -2.99267100 | -0.61397400 | -1.44157800 |
| C | -3.30912600 | 1.81177200  | -1.58558500 |
| H | -2.94210900 | 1.98324200  | -2.61504900 |
| H | -4.01086100 | 2.63900100  | -1.35401200 |

|    |             |             |             |
|----|-------------|-------------|-------------|
| C  | -3.57203800 | 0.76792600  | 1.90635600  |
| H  | -3.98875100 | 0.69067900  | 2.93678400  |
| H  | -4.26653100 | 0.20909900  | 1.25288100  |
| C  | -3.53482800 | -1.89907100 | -0.92747500 |
| H  | -4.18084000 | -2.39027700 | -1.69023900 |
| H  | -4.17473600 | -1.66808600 | -0.05520600 |
| C  | -2.48846200 | -1.40469700 | 2.20385400  |
| H  | -3.46608000 | -1.72115100 | 1.79482400  |
| H  | -2.54561300 | -1.52885500 | 3.30742400  |
| C  | -2.37419600 | -2.81503700 | -0.56039500 |
| H  | -2.72827800 | -3.66551500 | 0.05954600  |
| H  | -1.93687800 | -3.25191400 | -1.47752800 |
| C  | -4.01590100 | 0.46691600  | -1.49683700 |
| H  | -4.64014800 | 0.39281300  | -0.58804700 |
| H  | -4.69174600 | 0.32837700  | -2.37055800 |
| C  | -1.33131700 | 0.61774700  | 2.85535500  |
| H  | -1.04728000 | 1.64883200  | 2.58779600  |
| H  | -0.41036800 | 0.01218800  | 2.90562800  |
| H  | -1.81866200 | 0.62693200  | 3.85500200  |
| C  | -2.35451200 | -0.79945100 | -2.77609800 |
| H  | -1.52377100 | -1.52490300 | -2.71602400 |
| H  | -1.94703600 | 0.15862500  | -3.14613700 |
| H  | -3.10714800 | -1.17370400 | -3.50491900 |
| C  | 0.03796200  | -2.62867600 | -0.30610000 |
| H  | 0.09037400  | -3.71774500 | -0.08310800 |
| H  | 0.88135700  | -2.11674000 | 0.18941300  |
| H  | 0.13204900  | -2.48494800 | -1.39886800 |
| C  | -1.35650900 | -2.24173000 | 1.64006500  |
| H  | -0.38602300 | -1.92515200 | 2.07034300  |
| H  | -1.50146100 | -3.31357200 | 1.90047400  |
| C  | -2.37825200 | 2.70009100  | 0.55918300  |
| H  | -2.60078200 | 3.73967100  | 0.22761800  |
| H  | -1.41405100 | 2.74632600  | 1.10000700  |
| C  | -3.50684000 | 2.25048000  | 1.49235600  |
| H  | -4.49287100 | 2.51030100  | 1.05366900  |
| H  | -3.40610000 | 2.89069400  | 2.39340300  |
| C  | -0.98815100 | 2.53173500  | -1.39353100 |
| H  | -1.30372000 | 3.54073400  | -1.73881900 |
| H  | -0.70621100 | 1.91976100  | -2.26970400 |
| H  | -0.11476900 | 2.62481100  | -0.72581200 |
| N  | -2.11023500 | 1.87883600  | -0.66052600 |
| Co | -1.53223600 | -0.02376700 | -0.14141000 |
| O  | 0.08667300  | 0.47013900  | 0.55684400  |
| O  | 0.83671800  | 0.35039300  | -0.63089100 |

|   |            |             |             |
|---|------------|-------------|-------------|
| H | 1.74789400 | -0.23599700 | -0.25998800 |
| N | 5.04174100 | 0.19752900  | -0.15189600 |
| C | 5.13955400 | 1.20072900  | 0.95784300  |
| H | 4.27740900 | 1.88701600  | 0.82461500  |
| H | 4.96178900 | 0.65465700  | 1.90670000  |
| C | 4.99309000 | 0.86362100  | -1.49178900 |
| H | 4.24446900 | 1.67764500  | -1.39971300 |
| H | 5.97476100 | 1.34224800  | -1.70304900 |
| C | 6.07605100 | -0.88073500 | -0.08606600 |
| H | 5.89211700 | -1.54545400 | -0.95227300 |
| H | 7.08477900 | -0.43431400 | -0.23247300 |
| C | 6.02101900 | -1.70689200 | 1.19715200  |
| H | 6.71719300 | -2.56554100 | 1.10438100  |
| H | 6.32394300 | -1.13355500 | 2.09689200  |
| H | 5.00165100 | -2.11304800 | 1.36383500  |
| C | 6.44241900 | 1.99431300  | 1.04785600  |
| H | 6.64103800 | 2.58965700  | 0.13328400  |
| H | 6.37045300 | 2.70744900  | 1.89504600  |
| H | 7.32128800 | 1.34455800  | 1.23852000  |
| C | 4.59962800 | -0.06467400 | -2.64034700 |
| H | 4.43548000 | 0.54521600  | -3.55236900 |
| H | 5.38567800 | -0.80787900 | -2.88309700 |
| H | 3.65777500 | -0.61094400 | -2.42602000 |
| O | 2.78298900 | -0.85385000 | 0.26530600  |
| H | 3.88257600 | -0.35387100 | 0.04133800  |
| H | 2.64671700 | -0.75117600 | 1.22999300  |

<sup>3</sup>TS3, L=13-TMC

BP86/BS1 SCF energy in solution: -2633.9610297 a.u.

BP86/BS2 SCF energy in solution: -2635.66020241 a.u.

BP86/BS2 Free energy in solution: -2635.05619141 a.u.

2 3

|   |             |             |             |
|---|-------------|-------------|-------------|
| N | -2.39002300 | -0.31227500 | 1.88944700  |
| N | -1.35813100 | -2.06787000 | -0.26607700 |
| N | -3.04161300 | -0.33807900 | -1.59981900 |
| C | -3.32841100 | 2.08178900  | -1.33166700 |
| H | -2.96112200 | 2.40613400  | -2.32359900 |
| H | -4.01567800 | 2.87501000  | -0.97083400 |
| C | -3.66847500 | 0.42319500  | 2.00224300  |
| H | -4.13153700 | 0.23350900  | 3.00096500  |
| H | -4.35841500 | -0.02171200 | 1.25996000  |
| C | -3.60347800 | -1.69188100 | -1.33893500 |
| H | -4.24005500 | -2.02506400 | -2.18924700 |
| H | -4.25375000 | -1.61459700 | -0.44807400 |

|    |             |             |             |
|----|-------------|-------------|-------------|
| C  | -2.60377700 | -1.78236300 | 1.89126200  |
| H  | -3.57636300 | -2.00491400 | 1.41173500  |
| H  | -2.67182500 | -2.17382900 | 2.93265800  |
| C  | -2.45205100 | -2.66687700 | -1.12458600 |
| H  | -2.81975300 | -3.60907300 | -0.66725500 |
| H  | -1.99732600 | -2.94069300 | -2.09463900 |
| C  | -4.05293600 | 0.74872300  | -1.44814700 |
| H  | -4.65185400 | 0.52577500  | -0.54651200 |
| H  | -4.74865800 | 0.75614700  | -2.31655800 |
| C  | -1.48539300 | 0.04762900  | 3.00401000  |
| H  | -1.24339300 | 1.12510200  | 2.99117100  |
| H  | -0.53576100 | -0.51203100 | 2.92976600  |
| H  | -1.96938300 | -0.19329400 | 3.97960700  |
| C  | -2.40096600 | -0.27747700 | -2.94391400 |
| H  | -1.66481600 | -1.09293300 | -3.06215300 |
| H  | -1.87210200 | 0.68277700  | -3.08195500 |
| H  | -3.17722300 | -0.37738800 | -3.73401600 |
| C  | -0.03376400 | -2.48348900 | -0.79906400 |
| H  | 0.04964700  | -3.59269500 | -0.79556300 |
| H  | 0.77478300  | -2.05872700 | -0.17759300 |
| H  | 0.08036400  | -2.11807300 | -1.83745000 |
| C  | -1.46830000 | -2.48938100 | 1.16600300  |
| H  | -0.49939600 | -2.25423000 | 1.64850700  |
| H  | -1.60634700 | -3.59184900 | 1.21740800  |
| C  | -2.39556100 | 2.51526600  | 0.95880500  |
| H  | -2.56813200 | 3.61077400  | 0.85132800  |
| H  | -1.44051700 | 2.40108600  | 1.50663000  |
| C  | -3.56127600 | 1.94849800  | 1.78114400  |
| H  | -4.52853500 | 2.29258500  | 1.35807800  |
| H  | -3.47470400 | 2.46416900  | 2.76103100  |
| C  | -1.00801400 | 2.76486900  | -0.99339800 |
| H  | -1.31483900 | 3.82712000  | -1.11467200 |
| H  | -0.73001800 | 2.35563500  | -1.98264600 |
| H  | -0.13081400 | 2.71313700  | -0.32451000 |
| N  | -2.13044000 | 1.97463900  | -0.41582000 |
| Co | -1.57086100 | -0.00342800 | -0.25891500 |
| O  | -0.01028800 | 0.22500500  | 0.59114400  |
| O  | 1.00575700  | 0.51463200  | -0.31638400 |
| H  | 1.90085000  | 0.02269600  | 0.17129200  |
| N  | 5.23594800  | 0.01522900  | -0.08248700 |
| C  | 4.95731600  | 0.89648400  | -1.25724100 |
| H  | 4.34104000  | 0.29213900  | -1.95632200 |
| H  | 4.30673500  | 1.72151500  | -0.90179300 |
| C  | 5.92241300  | -1.24752300 | -0.48974800 |

|   |            |             |             |
|---|------------|-------------|-------------|
| H | 5.41443600 | -1.59477800 | -1.41362900 |
| H | 6.97981000 | -1.02900800 | -0.76374300 |
| C | 5.95283900 | 0.70215900  | 1.03125400  |
| H | 6.05063000 | -0.03924300 | 1.84950900  |
| H | 6.98916000 | 0.95795200  | 0.71067800  |
| C | 5.23408200 | 1.94112100  | 1.56316200  |
| H | 5.74062100 | 2.28823200  | 2.48698400  |
| H | 5.24178200 | 2.78610300  | 0.84513800  |
| H | 4.17802000 | 1.71636600  | 1.82122300  |
| C | 6.17293500 | 1.46679500  | -1.99156300 |
| H | 6.82407100 | 0.67230300  | -2.41014800 |
| H | 5.82354900 | 2.08952600  | -2.84125000 |
| H | 6.79445600 | 2.11688000  | -1.34156200 |
| C | 5.86683400 | -2.35546400 | 0.56303300  |
| H | 6.27734800 | -3.29031300 | 0.12869300  |
| H | 6.46790600 | -2.12581900 | 1.46652900  |
| H | 4.82145600 | -2.55520800 | 0.87741300  |
| O | 2.90736600 | -0.65267000 | 0.71105000  |
| H | 3.96427600 | -0.34535100 | 0.37849700  |
| H | 2.87762600 | -0.52896000 | 1.68251900  |

<sup>o</sup>STS3, L=14-TMC

BP86/BS1 SCF energy in solution: -2673.24694183 a.u.

BP86/BS2 SCF energy in solution: -2674.98967881 a.u.

BP86/BS2 Free energy in solution: -2674.35769681 a.u.

2 1

|   |             |             |             |
|---|-------------|-------------|-------------|
| N | -1.67686300 | 1.09445200  | -1.81086400 |
| N | -2.65658800 | -1.14883100 | 1.46714600  |
| N | -1.24677200 | -1.68044000 | -1.18645800 |
| N | -2.24316100 | 1.68339800  | 1.12029400  |
| C | -3.42426800 | 2.39657900  | 0.54178200  |
| H | -3.68984900 | 3.23448500  | 1.22627400  |
| H | -4.28145900 | 1.69382400  | 0.53881000  |
| C | -0.79256200 | -1.09180900 | -2.48741900 |
| H | -0.77618300 | -1.87992700 | -3.27322400 |
| H | 0.24879800  | -0.74326200 | -2.34507300 |
| C | -3.21548300 | 2.92818700  | -0.87372000 |
| H | -2.42958700 | 3.71055000  | -0.90975600 |
| H | -4.15456900 | 3.44510700  | -1.16335300 |
| C | -3.65014900 | -2.07088600 | 0.82588300  |
| H | -4.37569300 | -1.42678400 | 0.28654400  |
| H | -4.21202600 | -2.58262200 | 1.64066900  |
| C | -2.60079300 | 1.10218000  | 2.45097600  |
| H | -3.14731000 | 1.85627100  | 3.06008900  |



|    |             |             |             |
|----|-------------|-------------|-------------|
| H  | -1.65360600 | 0.87321100  | 2.97681600  |
| C  | -3.08131100 | -3.10482100 | -0.13848200 |
| H  | -2.38052800 | -3.79678700 | 0.37195100  |
| H  | -3.93399900 | -3.73958200 | -0.45941700 |
| C  | -3.42708800 | -0.14514100 | 2.26937700  |
| H  | -3.71066200 | -0.58047600 | 3.25226800  |
| H  | -4.36848400 | 0.07944700  | 1.73171300  |
| C  | -0.51504100 | 1.98814000  | -2.04623200 |
| H  | 0.40988000  | 1.38707700  | -2.08175600 |
| H  | -0.39810200 | 2.71939500  | -1.23145200 |
| H  | -0.64968100 | 2.52995300  | -3.00865700 |
| C  | -2.47071500 | -2.51603100 | -1.40759300 |
| H  | -2.19732200 | -3.33753000 | -2.10855500 |
| H  | -3.22956900 | -1.89344100 | -1.92166300 |
| C  | -1.68702400 | 0.05119500  | -2.88714000 |
| H  | -1.35853000 | 0.49295300  | -3.85301100 |
| H  | -2.73027300 | -0.29153400 | -3.02993800 |
| C  | -2.97360300 | 1.84468800  | -1.91698900 |
| H  | -3.78463500 | 1.08911700  | -1.85411300 |
| H  | -3.02100200 | 2.28835600  | -2.93807400 |
| C  | -1.74696100 | -1.88055500 | 2.38338000  |
| H  | -1.04186800 | -1.17086300 | 2.85180200  |
| H  | -1.15457500 | -2.63577500 | 1.84276300  |
| H  | -2.34105700 | -2.38975600 | 3.17373400  |
| C  | -0.13464800 | -2.55134900 | -0.71688500 |
| H  | 0.06301200  | -3.32392600 | -1.49319600 |
| H  | -0.39422500 | -3.07305000 | 0.21837100  |
| H  | 0.78367000  | -1.95862100 | -0.55739700 |
| C  | -1.14083000 | 2.65191300  | 1.36252600  |
| H  | -1.44575100 | 3.35709100  | 2.16655900  |
| H  | -0.92529800 | 3.24359600  | 0.45783400  |
| H  | -0.23029700 | 2.10507600  | 1.65694000  |
| Co | -1.75574000 | -0.01462200 | -0.02575800 |
| O  | -0.12929900 | -0.05833900 | 0.86959800  |
| O  | 0.91757500  | 0.62116500  | 0.25376400  |
| H  | 1.76071800  | -0.17032100 | 0.11664000  |
| N  | 5.10048800  | -0.03441200 | 0.06692200  |
| C  | 5.06004500  | 1.19407900  | -0.79757900 |
| H  | 4.74518500  | 0.84491000  | -1.80235700 |
| H  | 4.24049300  | 1.83143100  | -0.41039200 |
| C  | 6.00611300  | -1.09192800 | -0.50188200 |
| H  | 5.84513000  | -1.07806200 | -1.59891900 |
| H  | 7.05964400  | -0.79462900 | -0.31522400 |
| C  | 5.40500600  | 0.24481700  | 1.51183000  |

|   |            |             |             |
|---|------------|-------------|-------------|
| H | 5.32922300 | -0.72927700 | 2.03380700  |
| H | 6.46205300 | 0.57693400  | 1.59453500  |
| C | 4.45485100 | 1.25000200  | 2.15710600  |
| H | 4.61971200 | 1.24879900  | 3.25383000  |
| H | 4.61831100 | 2.28637700  | 1.79849000  |
| H | 3.39562100 | 0.97880700  | 1.96957100  |
| C | 6.36068100 | 1.98740800  | -0.88753900 |
| H | 7.19248800 | 1.39076900  | -1.31456200 |
| H | 6.20001700 | 2.85800700  | -1.55620900 |
| H | 6.68377700 | 2.38226400  | 0.09723600  |
| C | 5.72986200 | -2.49274900 | 0.03901600  |
| H | 6.37344600 | -3.21735800 | -0.50049900 |
| H | 5.95857300 | -2.59283200 | 1.11954700  |
| H | 4.67223800 | -2.78171700 | -0.12838000 |
| O | 2.73862400 | -1.00085600 | 0.04020900  |
| H | 3.99376600 | -0.47875800 | 0.04354700  |
| H | 2.67396800 | -1.50057900 | 0.87996200  |

<sup>3</sup>TS3, L=14-TMC

BP86/BS1 SCF energy in solution: -2673.24983402 a.u.

BP86/BS2 SCF energy in solution: -2674.99248547 a.u.

BP86/BS2 Free energy in solution: -2674.36277047 a.u.

2 3

|   |             |             |             |
|---|-------------|-------------|-------------|
| N | -2.02892600 | 1.12923000  | -1.81395800 |
| N | -2.54696400 | -1.01020900 | 1.70665900  |
| N | -1.77491800 | -1.69022900 | -1.19961300 |
| N | -1.73474700 | 1.71715200  | 1.22826200  |
| C | -2.94045000 | 2.53967500  | 0.86916000  |
| H | -3.00435900 | 3.36742000  | 1.61184600  |
| H | -3.83565300 | 1.90285200  | 1.01292100  |
| C | -1.56758000 | -1.15495700 | -2.58492200 |
| H | -1.82333000 | -1.94325900 | -3.32710400 |
| H | -0.48756500 | -0.93290900 | -2.68442300 |
| C | -2.97580600 | 3.11942200  | -0.54275400 |
| H | -2.10742700 | 3.78244200  | -0.73609600 |
| H | -3.86179000 | 3.78801900  | -0.58004800 |
| C | -3.77076500 | -1.77499300 | 1.32241000  |
| H | -4.51052400 | -1.03241400 | 0.95756700  |
| H | -4.19448700 | -2.24067200 | 2.24263800  |
| C | -1.91066700 | 1.18308600  | 2.61741000  |
| H | -2.20086000 | 2.01092600  | 3.30199500  |
| H | -0.92443700 | 0.81025200  | 2.95738700  |
| C | -3.55738700 | -2.84091800 | 0.25459700  |
| H | -2.86934700 | -3.63660500 | 0.60672700  |

|    |             |             |             |
|----|-------------|-------------|-------------|
| H  | -4.53497300 | -3.34698700 | 0.10877800  |
| C  | -2.94378900 | 0.08085600  | 2.64596800  |
| H  | -3.05411900 | -0.31943300 | 3.67831400  |
| H  | -3.93941800 | 0.45687300  | 2.34182700  |
| C  | -0.80094300 | 1.81988600  | -2.28396600 |
| H  | 0.04658500  | 1.11053400  | -2.31810400 |
| H  | -0.52372100 | 2.64318200  | -1.60470200 |
| H  | -0.97363500 | 2.24788700  | -3.29694900 |
| C  | -3.14918300 | -2.29392100 | -1.10994800 |
| H  | -3.19347500 | -3.10995900 | -1.86629900 |
| H  | -3.88198800 | -1.52253200 | -1.41830200 |
| C  | -2.39976300 | 0.08689600  | -2.81252800 |
| H  | -2.24749500 | 0.46776000  | -3.84710600 |
| H  | -3.48086400 | -0.12690500 | -2.70682000 |
| C  | -3.15943700 | 2.08965700  | -1.65405000 |
| H  | -4.06828200 | 1.48669100  | -1.44728300 |
| H  | -3.32065300 | 2.61081000  | -2.62680500 |
| C  | -1.56078400 | -1.88300400 | 2.39771800  |
| H  | -0.72413000 | -1.27428100 | 2.78671400  |
| H  | -1.13690400 | -2.63872400 | 1.71613100  |
| H  | -2.05086700 | -2.40524100 | 3.25004500  |
| C  | -0.75196200 | -2.74848800 | -0.98191500 |
| H  | -0.79952900 | -3.47926000 | -1.81857500 |
| H  | -0.93639000 | -3.29515400 | -0.04224000 |
| H  | 0.24854000  | -2.28118900 | -0.95546500 |
| C  | -0.51600800 | 2.56445400  | 1.23848800  |
| H  | -0.63426100 | 3.37117600  | 1.99462200  |
| H  | -0.33993000 | 3.02710500  | 0.25342600  |
| H  | 0.35885800  | 1.94229300  | 1.49539400  |
| Co | -1.65899800 | 0.00531600  | 0.00800600  |
| O  | 0.17170500  | 0.04720800  | 0.19549400  |
| O  | 1.02697800  | -0.36917200 | -0.81903000 |
| H  | 1.95548300  | -0.80575900 | -0.26899100 |
| N  | 5.15985500  | -0.09782300 | 0.01156400  |
| C  | 4.81466400  | 1.06209600  | -0.86874000 |
| H  | 4.40467300  | 0.62461700  | -1.80302000 |
| H  | 3.97646400  | 1.60199100  | -0.38375000 |
| C  | 6.10776300  | -1.04050600 | -0.66092800 |
| H  | 5.76521000  | -1.12840000 | -1.71295900 |
| H  | 7.12526300  | -0.58997900 | -0.68500900 |
| C  | 5.63970500  | 0.29642500  | 1.37059300  |
| H  | 5.80943500  | -0.64531900 | 1.92989800  |
| H  | 6.62978100  | 0.79840900  | 1.28267000  |
| C  | 4.65745100  | 1.17217600  | 2.14624100  |

|   |            |             |             |
|---|------------|-------------|-------------|
| H | 5.01512100 | 1.28255900  | 3.19047500  |
| H | 4.56072200 | 2.19187600  | 1.72115100  |
| H | 3.64668700 | 0.71478900  | 2.18254500  |
| C | 5.95090000 | 2.03187300  | -1.19462600 |
| H | 6.79231500 | 1.53655500  | -1.72142900 |
| H | 5.56446800 | 2.82726500  | -1.86530100 |
| H | 6.35341800 | 2.53157400  | -0.28955900 |
| C | 6.15400800 | -2.43045300 | -0.02636500 |
| H | 6.77630900 | -3.09682300 | -0.65860000 |
| H | 6.60447300 | -2.42825200 | 0.98709500  |
| H | 5.13710400 | -2.86890200 | 0.04135200  |
| O | 2.98033600 | -1.36353800 | 0.25367600  |
| H | 4.00406300 | -0.75956400 | 0.16707400  |
| H | 2.80633600 | -1.49927600 | 1.20760500  |

<sup>3</sup>TS5a, L=13-TMC

BP86/BS1 SCF energy in solution: -2418.0964788 a.u.

BP86/BS2 SCF energy in solution: -2419.56114208 a.u.

BP86/BS2 Free energy in solution: -2419.12558208 a.u.

2 3

|   |             |             |             |
|---|-------------|-------------|-------------|
| N | 1.22499400  | -0.49614800 | 1.82853800  |
| N | 1.19998900  | 1.96316600  | 0.25062100  |
| N | 1.53235500  | 0.03254800  | -1.70767100 |
| C | 0.45639700  | -2.16913200 | -1.86144500 |
| H | -0.11898700 | -2.02967300 | -2.79590400 |
| H | 0.62511600  | -3.25960700 | -1.74876900 |
| C | 1.87628100  | -1.80090000 | 1.55816900  |
| H | 2.45329800  | -2.12468000 | 2.45693600  |
| H | 2.62485300  | -1.61563700 | 0.76322600  |
| C | 2.76535500  | 0.78034300  | -1.32822400 |
| H | 3.41731900  | 0.93861500  | -2.21587600 |
| H | 3.32035100  | 0.14963900  | -0.60932600 |
| C | 2.24037000  | 0.57207700  | 2.04799800  |
| H | 3.13329700  | 0.34044200  | 1.43569400  |
| H | 2.57673100  | 0.58669100  | 3.10944400  |
| C | 2.36283500  | 2.11460600  | -0.71607500 |
| H | 3.22539500  | 2.57968700  | -0.19594900 |
| H | 2.04759700  | 2.82166400  | -1.50559900 |
| C | 1.78090700  | -1.42307500 | -1.93934100 |
| H | 2.49118700  | -1.76796600 | -1.16576700 |
| H | 2.26384200  | -1.58060900 | -2.92918700 |
| C | 0.33949400  | -0.58630500 | 3.01336700  |
| H | -0.51959200 | -1.25420300 | 2.82771400  |
| H | -0.05040600 | 0.41102900  | 3.29221300  |

|    |             |             |             |
|----|-------------|-------------|-------------|
| H  | 0.91454500  | -0.97987800 | 3.88267100  |
| C  | 0.86098200  | 0.65545000  | -2.88446500 |
| H  | 1.53967700  | 0.60671300  | -3.76367200 |
| H  | 0.61770600  | 1.71250000  | -2.67767000 |
| H  | -0.07554900 | 0.12201600  | -3.12586100 |
| C  | 0.27801100  | 3.11815300  | 0.06652600  |
| H  | 0.81669900  | 4.07242500  | 0.25388100  |
| H  | -0.56947000 | 3.04609100  | 0.77112000  |
| H  | -0.11041600 | 3.12340700  | -0.96957400 |
| C  | 1.66520000  | 1.92792600  | 1.67611200  |
| H  | 0.79445400  | 2.17307700  | 2.31603100  |
| H  | 2.41849900  | 2.72883700  | 1.84120300  |
| C  | -0.41486200 | -2.57513300 | 0.46345900  |
| H  | -0.89458500 | -3.52609900 | 0.13772100  |
| H  | -1.11061200 | -2.10402700 | 1.18385900  |
| C  | 0.91349100  | -2.93295900 | 1.14282700  |
| H  | 1.48963700  | -3.63865000 | 0.50788300  |
| H  | 0.61576100  | -3.51990800 | 2.03708800  |
| C  | -1.80351500 | -1.51908000 | -1.19778400 |
| H  | -2.16837400 | -2.49812100 | -1.57697700 |
| H  | -1.85304700 | -0.77685900 | -2.01693500 |
| H  | -2.45163900 | -1.19417800 | -0.36604700 |
| N  | -0.39827100 | -1.65293800 | -0.71930100 |
| Co | 0.30210000  | 0.16054500  | -0.13299000 |
| O  | -1.36867800 | 0.59001000  | 0.77010900  |
| O  | -5.07810500 | 0.03871400  | -0.35820900 |
| H  | -2.24333900 | 1.10132800  | 0.14379200  |
| O  | -5.77654900 | 0.43210800  | 0.78228400  |
| H  | -6.56225200 | -0.16799000 | 0.76622400  |
| O  | -3.19669600 | 1.62510300  | -0.44937400 |
| H  | -2.96498400 | 1.73005800  | -1.39577900 |
| H  | -4.06636500 | 0.91919200  | -0.41244000 |
| H  | -1.26194500 | 1.15427400  | 1.56484300  |

<sup>3</sup>TS5a, L=14-TMC

BP86/BS1 SCF energy in solution: -2457.38819232 a.u.

BP86/BS2 SCF energy in solution: -2458.89694043 a.u.

BP86/BS2 Free energy in solution: -2458.43461143 a.u.

2 3

|   |             |             |             |
|---|-------------|-------------|-------------|
| N | -1.31851900 | 1.91913100  | -0.62939300 |
| N | -0.43617600 | -1.59876200 | 1.33348500  |
| N | -1.98183600 | -0.80185800 | -1.22315400 |
| N | 0.92246000  | 0.94251400  | 1.24540400  |
| C | 0.26508500  | 1.96902100  | 2.11875200  |

|   |             |             |             |
|---|-------------|-------------|-------------|
| H | 1.03353300  | 2.32650400  | 2.84071600  |
| H | -0.52568000 | 1.46112400  | 2.70552100  |
| C | -2.52053600 | 0.32505800  | -2.05704300 |
| H | -3.50096200 | 0.03209800  | -2.49168500 |
| H | -1.82425000 | 0.48412600  | -2.90238700 |
| C | -0.34409000 | 3.15975500  | 1.38563300  |
| H | 0.41693900  | 3.71639300  | 0.80169600  |
| H | -0.68898000 | 3.86894600  | 2.16696600  |
| C | -1.81220300 | -2.01464100 | 1.74606400  |
| H | -2.26683800 | -1.15102400 | 2.27460300  |
| H | -1.71057100 | -2.84014700 | 2.48737700  |
| C | 1.42113200  | -0.18853800 | 2.09721500  |
| H | 1.96859300  | 0.22042300  | 2.97461000  |
| H | 2.14912000  | -0.76256000 | 1.49067300  |
| C | -2.72620500 | -2.44575700 | 0.60532700  |
| H | -2.33078300 | -3.33218600 | 0.06808700  |
| H | -3.67595100 | -2.78457000 | 1.06968700  |
| C | 0.27246200  | -1.06092800 | 2.53560300  |
| H | 0.63586200  | -1.89881800 | 3.17002800  |
| H | -0.45862000 | -0.49042300 | 3.14010200  |
| C | -0.49566900 | 2.60192400  | -1.66315700 |
| H | -0.37010800 | 1.94951200  | -2.54575900 |
| H | 0.50537300  | 2.85331000  | -1.27772100 |
| H | -1.00170700 | 3.54165900  | -1.97623500 |
| C | -3.09304400 | -1.31877700 | -0.35165900 |
| H | -3.90821800 | -1.65424900 | -1.03149600 |
| H | -3.48502800 | -0.46559300 | 0.23656100  |
| C | -2.64875900 | 1.57461700  | -1.22492600 |
| H | -3.02042200 | 2.42201800  | -1.84145300 |
| H | -3.37128000 | 1.43624300  | -0.39800800 |
| C | -1.56598500 | 2.81619900  | 0.54337300  |
| H | -2.31714500 | 2.30582500  | 1.18095900  |
| H | -2.03804100 | 3.74959900  | 0.15984800  |
| C | 0.32602500  | -2.76504600 | 0.81105500  |
| H | 1.32718700  | -2.45509900 | 0.45907200  |
| H | -0.20793500 | -3.23797400 | -0.02998200 |
| H | 0.43782600  | -3.52353400 | 1.61701700  |
| C | -1.53790800 | -1.87227600 | -2.15969400 |
| H | -2.42788500 | -2.32290000 | -2.64999400 |
| H | -0.97676400 | -2.66736700 | -1.64298100 |
| H | -0.90310000 | -1.44649700 | -2.95906900 |
| C | 2.11531700  | 1.54270100  | 0.58532700  |
| H | 2.81075100  | 1.91290400  | 1.36958000  |
| H | 1.83749500  | 2.39074200  | -0.06211200 |

|    |             |             |             |
|----|-------------|-------------|-------------|
| H  | 2.63439400  | 0.79069700  | -0.02868200 |
| Co | -0.50054400 | 0.05551300  | -0.01402700 |
| O  | 0.93212100  | -0.31634000 | -1.34316900 |
| O  | 4.83732200  | -0.13335500 | -1.61384700 |
| H  | 1.88304100  | -0.92073800 | -1.16421500 |
| O  | 5.80994200  | -0.31447800 | -0.61600600 |
| H  | 6.57010300  | 0.19941900  | -0.98150300 |
| O  | 2.98703500  | -1.55688500 | -0.90701100 |
| H  | 3.01037100  | -2.38144500 | -1.43487000 |
| H  | 3.89445000  | -0.90472800 | -1.23588500 |
| H  | 0.64330400  | -0.51912500 | -2.25567100 |

<sup>5</sup>TS7, L=13-TMC

BP86/BS1 SCF energy in solution: -2341.24170008 a.u.

BP86/BS2 SCF energy in solution: -2342.59933948 a.u.

BP86/BS2 Free energy in solution: -2342.19523048 a.u.

1 5

|   |             |             |             |
|---|-------------|-------------|-------------|
| N | -1.51759300 | 1.49639400  | -0.37126800 |
| N | 1.41995900  | 1.74430300  | 0.01576000  |
| N | 0.72109100  | -0.49374600 | 1.73089000  |
| C | -0.99842900 | -2.26507400 | 1.33254300  |
| H | -0.29630600 | -3.12159200 | 1.31716200  |
| H | -1.96378900 | -2.65801100 | 1.72208000  |
| C | -2.57260400 | 1.04425100  | 0.57599500  |
| H | -3.35777200 | 1.83415300  | 0.66234300  |
| H | -2.08170800 | 0.99605300  | 1.56688300  |
| C | 0.97581500  | 0.82824900  | 2.35068600  |
| H | 1.47717200  | 0.72386600  | 3.34305500  |
| H | -0.00690600 | 1.30242300  | 2.53714600  |
| C | -0.88119900 | 2.73475800  | 0.16546500  |
| H | -0.90266200 | 2.68272400  | 1.27128000  |
| H | -1.47584600 | 3.63484600  | -0.11788500 |
| C | 1.85192600  | 1.71152400  | 1.44857000  |
| H | 1.89273600  | 2.73989000  | 1.87490600  |
| H | 2.89050100  | 1.32593000  | 1.46677900  |
| C | -0.46455100 | -1.19117400 | 2.29189000  |
| H | -1.24207400 | -0.42997900 | 2.49642200  |
| H | -0.22123600 | -1.67165100 | 3.26937500  |
| C | -2.06165300 | 1.74423900  | -1.72175700 |
| H | -2.50099400 | 0.82081900  | -2.14302100 |
| H | -1.25384500 | 2.07885100  | -2.39952800 |
| H | -2.85424100 | 2.52881000  | -1.69179900 |
| C | 1.91914600  | -1.36056000 | 1.75690000  |
| H | 2.11950600  | -1.72357400 | 2.79229600  |

|    |             |             |             |
|----|-------------|-------------|-------------|
| H  | 2.80186700  | -0.80060100 | 1.39932200  |
| H  | 1.79418200  | -2.22732500 | 1.08064100  |
| C  | 2.60861700  | 1.76196100  | -0.86745500 |
| H  | 3.22245900  | 2.68017000  | -0.70955100 |
| H  | 2.27929100  | 1.73318500  | -1.92364800 |
| H  | 3.23054800  | 0.86824300  | -0.67520400 |
| C  | 0.55004600  | 2.89933300  | -0.32714300 |
| H  | 0.55404000  | 2.99462400  | -1.43177900 |
| H  | 0.97167000  | 3.84977900  | 0.07936400  |
| C  | -2.54113400 | -1.42483400 | -0.46950600 |
| H  | -3.18372900 | -2.33741300 | -0.40742600 |
| H  | -2.48412700 | -1.16527800 | -1.54623200 |
| C  | -3.27169900 | -0.30146700 | 0.28342200  |
| H  | -3.63333600 | -0.67754500 | 1.26441100  |
| H  | -4.19156300 | -0.12096800 | -0.31279600 |
| C  | -0.67821300 | -2.83341300 | -1.01393100 |
| H  | -1.28818700 | -3.76289400 | -0.92105100 |
| H  | 0.38448300  | -3.07399000 | -0.82176300 |
| H  | -0.76655700 | -2.47234200 | -2.05707100 |
| N  | -1.14932300 | -1.78486800 | -0.07871200 |
| Co | 0.08959400  | -0.00525900 | -0.26576100 |
| O  | 0.45511900  | -0.03136900 | -2.38276000 |
| H  | -0.21795600 | -0.52406700 | -2.89702900 |
| H  | 1.26766700  | -0.66101800 | -2.34724400 |
| O  | 2.61399800  | -2.62707800 | -1.40249800 |
| O  | 2.39117300  | -1.34723900 | -1.52419800 |

<sup>5</sup>TS7, L=14-TMC

BP86/BS1 SCF energy in solution: -2380.53349432 a.u.

BP86/BS2 SCF energy in solution: -2381.93477146 a.u.

BP86/BS2 Free energy in solution: -2381.50059446 a.u.

1 5

|   |             |             |             |
|---|-------------|-------------|-------------|
| N | -1.71773600 | 0.36450000  | -1.12214000 |
| N | 2.17072700  | -0.81843100 | 0.05834900  |
| N | 0.66297500  | 2.00012700  | -0.36155100 |
| N | -0.48827900 | -2.20281300 | 0.38991300  |
| C | -0.97739800 | -2.81950300 | -0.87540300 |
| H | -1.25549100 | -3.88182600 | -0.66625000 |
| H | -0.13000400 | -2.85123500 | -1.58981400 |
| C | -0.60675000 | 2.58939400  | -0.87405100 |
| H | -0.40137700 | 3.54651900  | -1.41106900 |
| H | -1.24317100 | 2.82854500  | -0.00043100 |
| C | -2.14851300 | -2.11477100 | -1.56102100 |
| H | -3.04541000 | -2.08955600 | -0.90758500 |



|    |             |             |             |
|----|-------------|-------------|-------------|
| H  | -2.43695600 | -2.75550900 | -2.42166900 |
| C  | 2.83558500  | -0.27137200 | -1.15571000 |
| H  | 2.24002900  | -0.60021500 | -2.03384300 |
| H  | 3.84566000  | -0.74005400 | -1.25636300 |
| C  | 0.82069600  | -2.80483800 | 0.76103500  |
| H  | 0.77637000  | -3.91808200 | 0.68270500  |
| H  | 1.00837500  | -2.56668000 | 1.82677100  |
| C  | 2.98077000  | 1.25077700  | -1.18857500 |
| H  | 3.51050100  | 1.62362500  | -0.28695000 |
| H  | 3.65751400  | 1.48800300  | -2.03711900 |
| C  | 1.96233400  | -2.28398100 | -0.10603500 |
| H  | 2.89696800  | -2.84350100 | 0.13429200  |
| H  | 1.75063200  | -2.47954400 | -1.17639500 |
| C  | -3.01122700 | 0.56303100  | -0.42963800 |
| H  | -2.97014000 | 1.43888900  | 0.24230200  |
| H  | -3.26264500 | -0.31496000 | 0.19325200  |
| H  | -3.82788600 | 0.70992900  | -1.17713500 |
| C  | 1.68979400  | 2.03312300  | -1.44334200 |
| H  | 1.94318500  | 3.10158600  | -1.65123300 |
| H  | 1.22123300  | 1.63381200  | -2.36542200 |
| C  | -1.33510200 | 1.63043600  | -1.80964000 |
| H  | -2.23606400 | 2.13367000  | -2.23175000 |
| H  | -0.69052800 | 1.37027700  | -2.67354000 |
| C  | -1.84068500 | -0.72768600 | -2.12947200 |
| H  | -0.88592100 | -0.76614000 | -2.69640300 |
| H  | -2.63949700 | -0.44664600 | -2.85923800 |
| C  | 3.01309500  | -0.57824600 | 1.24951300  |
| H  | 2.60602800  | -1.11760200 | 2.12524100  |
| H  | 3.06643000  | 0.50054000  | 1.49309300  |
| H  | 4.05300600  | -0.94500700 | 1.07776200  |
| C  | 1.13259500  | 2.77764500  | 0.80436200  |
| H  | 1.32906500  | 3.84109300  | 0.52769800  |
| H  | 2.07271700  | 2.34886800  | 1.20148800  |
| H  | 0.36364200  | 2.74953900  | 1.59861900  |
| C  | -1.45966500 | -2.43978200 | 1.47819500  |
| H  | -1.61218600 | -3.53231000 | 1.65103100  |
| H  | -2.43997900 | -1.99182500 | 1.22804200  |
| H  | -1.08795700 | -1.97605300 | 2.41034900  |
| Co | 0.03313900  | -0.03096700 | 0.20230900  |
| O  | 0.29771200  | -0.03875000 | 2.33620400  |
| H  | 1.12388300  | 0.40395200  | 2.62343100  |
| H  | -0.44036500 | 0.60161000  | 2.62037900  |
| O  | -2.58263200 | 2.25728200  | 2.29045300  |
| O  | -1.52525400 | 1.54438600  | 2.03210700  |
